# Supplementary material
Source: publisher figshare collection journal article supplement (https://acs.figshare.com/ndownloader/files/5885982)
Supplement: Supplementary file 1 [file 5885982]

data_xushy_0722_1
_audit_creation_date              2016-07-27
_audit_creation_method
;
Olex2 1.2
(compiled 2016.02.19 svn.r3266 for OlexSys, GUI svn.r5155)
;
_publ_contact_author_address      ?
_publ_contact_author_email        ?
_publ_contact_author_name         ''
_publ_contact_author_phone        ?
_publ_section_references
;
Dolomanov, O.V., Bourhis, L.J., Gildea, R.J, Howard, J.A.K. & Puschmann, H.
 (2009), J. Appl. Cryst. 42, 339-341.

Sheldrick, G.M. (2008). Acta Cryst. A64, 112-122.

Sheldrick, G.M. (2015). Acta Cryst. C71, 3-8.
;
_chemical_name_common             ?
_chemical_name_systematic         ?
_chemical_formula_moiety          'C15 H23 N O3'
_chemical_formula_sum             'C15 H23 N O3'
_chemical_formula_weight          265.34
_chemical_absolute_configuration  unk
_chemical_melting_point           ?
loop_
  _atom_type_symbol
  _atom_type_description
  _atom_type_scat_dispersion_real
  _atom_type_scat_dispersion_imag
  _atom_type_scat_source
 'C' 'C' 0.0033 0.0016 'International Tables Vol C Tables 4.2.6.8 and 6.1.1.4'
 'H' 'H' 0.0000 0.0000 'International Tables Vol C Tables 4.2.6.8 and 6.1.1.4'
 'N' 'N' 0.0061 0.0033 'International Tables Vol C Tables 4.2.6.8 and 6.1.1.4'
 'O' 'O' 0.0106 0.0060 'International Tables Vol C Tables 4.2.6.8 and 6.1.1.4'

_shelx_space_group_comment
;
The symmetry employed for this shelxl refinement is uniquely defined
by the following loop, which should always be used as a source of
symmetry information in preference to the above space-group names.
They are only intended as comments.
;
_space_group_crystal_system       'orthorhombic'
_space_group_IT_number            19
_space_group_name_H-M_alt         'P 21 21 21'
_space_group_name_Hall            'P 2ac 2ab'
loop_
  _space_group_symop_operation_xyz
 'x, y, z'
 '-x+1/2, -y, z+1/2'
 'x+1/2, -y+1/2, -z'
 '-x, y+1/2, -z+1/2'

_cell_length_a                    8.5731(5)
_cell_length_b                    9.2969(4)
_cell_length_c                    17.1079(7)
_cell_angle_alpha                 90
_cell_angle_beta                  90
_cell_angle_gamma                 90
_cell_volume                      1363.55(12)
_cell_formula_units_Z             4
_cell_measurement_reflns_used     925
_cell_measurement_temperature     294.23(10)
_cell_measurement_theta_max       23.7830
_cell_measurement_theta_min       4.0110
_shelx_estimated_absorpt_T_max    ?
_shelx_estimated_absorpt_T_min    ?
_exptl_absorpt_coefficient_mu     0.089
_exptl_absorpt_correction_T_max   1.00000
_exptl_absorpt_correction_T_min   0.83609
_exptl_absorpt_correction_type    multi-scan
_exptl_absorpt_process_details
;
CrysAlisPro, Agilent Technologies,
Version 1.171.37.35 (release 13-08-2014 CrysAlis171 .NET)
(compiled Aug 13 2014,18:06:01)
Empirical absorption correction using spherical harmonics,
 implemented in SCALE3 ABSPACK scaling algorithm.
;
_exptl_absorpt_special_details    ?
_exptl_crystal_colour             'clear light colourless'
_exptl_crystal_colour_lustre      clear
_exptl_crystal_colour_modifier    light
_exptl_crystal_colour_primary     colourless
_exptl_crystal_density_diffrn     1.293
_exptl_crystal_density_meas       ?
_exptl_crystal_density_method     ?
_exptl_crystal_description        block
_exptl_crystal_F_000              576
_exptl_crystal_size_max           0.22
_exptl_crystal_size_mid           0.17
_exptl_crystal_size_min           0.14
_exptl_transmission_factor_max    ?
_exptl_transmission_factor_min    ?
_diffrn_reflns_av_R_equivalents   0.0272
_diffrn_reflns_av_unetI/netI      0.0621
_diffrn_reflns_Laue_measured_fraction_full 0.997
_diffrn_reflns_Laue_measured_fraction_max 0.997
_diffrn_reflns_limit_h_max        6
_diffrn_reflns_limit_h_min        -10
_diffrn_reflns_limit_k_max        11
_diffrn_reflns_limit_k_min        -6
_diffrn_reflns_limit_l_max        6
_diffrn_reflns_limit_l_min        -21
_diffrn_reflns_number             3496
_diffrn_reflns_point_group_measured_fraction_full 0.950
_diffrn_reflns_point_group_measured_fraction_max 0.945
_diffrn_reflns_theta_full         25.500
_diffrn_reflns_theta_max          26.017
_diffrn_reflns_theta_min          3.364
_diffrn_ambient_environment       air
_diffrn_ambient_temperature       294.23(10)
_diffrn_detector                  'CCD plate'
_diffrn_detector_area_resol_mean  16.0733
_diffrn_detector_type             Eos
_diffrn_measured_fraction_theta_full 0.997
_diffrn_measured_fraction_theta_max 0.997
_diffrn_measurement_details
;
#__ type_ start__ end____ width___ exp.time_
  1 omega  -38.00   85.25   1.4500    6.0000
omega____ theta____ kappa____ phi______ frames
    -       22.7867    0.0000  150.0000 85

#__ type_ start__ end____ width___ exp.time_
  2 omega   64.00   91.55   1.4500    6.0000
omega____ theta____ kappa____ phi______ frames
    -       22.7867  178.0000  -30.0000 19
;
_diffrn_measurement_device        'four-circle diffractometer'
_diffrn_measurement_device_type   'SuperNova, Dual, Cu at zero, Eos'
_diffrn_measurement_method        '\w scans'
_diffrn_orient_matrix_UB_11       -0.0360413000
_diffrn_orient_matrix_UB_12       -0.0134817000
_diffrn_orient_matrix_UB_13       0.0365842000
_diffrn_orient_matrix_UB_21       0.0681343000
_diffrn_orient_matrix_UB_22       -0.0361898000
_diffrn_orient_matrix_UB_23       0.0129219000
_diffrn_orient_matrix_UB_31       0.0300506000
_diffrn_orient_matrix_UB_32       0.0658036000
_diffrn_orient_matrix_UB_33       0.0146152000
_diffrn_radiation_monochromator   mirror
_diffrn_radiation_probe           x-ray
_diffrn_radiation_type            MoK\a
_diffrn_radiation_wavelength      0.71073
_diffrn_source                    'SuperNova (Mo) X-ray Source'
_reflns_Friedel_coverage          0.627
_reflns_Friedel_fraction_full     0.884
_reflns_Friedel_fraction_max      0.872
_reflns_number_gt                 1994
_reflns_number_total              2540
_reflns_odcompleteness_completeness 99.51
_reflns_odcompleteness_iscentric  1
_reflns_odcompleteness_theta      26.32
_reflns_special_details
;
 Reflections were merged by SHELXL according to the crystal
 class for the calculation of statistics and refinement.
 
 _reflns_Friedel_fraction is defined as the number of unique
 Friedel pairs measured divided by the number that would be
 possible theoretically, ignoring centric projections and
 systematic absences.
;
_reflns_threshold_expression      'I > 2\s(I)'
_computing_cell_refinement
;
CrysAlisPro, Agilent Technologies,
Version 1.171.37.35 (release 13-08-2014 CrysAlis171 .NET)
(compiled Aug 13 2014,18:06:01)
;
_computing_data_collection
;
CrysAlisPro, Agilent Technologies,
Version 1.171.37.35 (release 13-08-2014 CrysAlis171 .NET)
(compiled Aug 13 2014,18:06:01)
;
_computing_data_reduction
;
CrysAlisPro, Agilent Technologies,
Version 1.171.37.35 (release 13-08-2014 CrysAlis171 .NET)
(compiled Aug 13 2014,18:06:01)
;
_computing_molecular_graphics     'Olex2 (Dolomanov et al., 2009)'
_computing_publication_material   'Olex2 (Dolomanov et al., 2009)'
_computing_structure_refinement   'ShelXL (Sheldrick, 2015)'
_computing_structure_solution     'ShelXS (Sheldrick, 2008)'
_refine_diff_density_max          0.144
_refine_diff_density_min          -0.157
_refine_diff_density_rms          0.039
_refine_ls_abs_structure_details
;
 Flack x determined using 575 quotients [(I+)-(I-)]/[(I+)+(I-)]
 (Parsons, Flack and Wagner, Acta Cryst. B69 (2013) 249-259).
;
_refine_ls_abs_structure_Flack    1.6(10)
_refine_ls_extinction_coef        .
_refine_ls_extinction_method      none
_refine_ls_goodness_of_fit_ref    1.089
_refine_ls_hydrogen_treatment     constr
_refine_ls_matrix_type            full
_refine_ls_number_parameters      175
_refine_ls_number_reflns          2540
_refine_ls_number_restraints      0
_refine_ls_R_factor_all           0.0722
_refine_ls_R_factor_gt            0.0532
_refine_ls_restrained_S_all       1.089
_refine_ls_shift/su_max           0.000
_refine_ls_shift/su_mean          0.000
_refine_ls_structure_factor_coef  Fsqd
_refine_ls_weighting_details
'w=1/[\s^2^(Fo^2^)+(0.0325P)^2^+0.1623P] where P=(Fo^2^+2Fc^2^)/3'
_refine_ls_weighting_scheme       calc
_refine_ls_wR_factor_gt           0.0978
_refine_ls_wR_factor_ref          0.1118
_refine_special_details           ?
_olex2_refinement_description
;
1. Fixed Uiso
 At 1.2 times of:
  All C(H) groups, All C(H,H) groups
 At 1.5 times of:
  All C(H,H,H) groups, All O(H) groups
2.a Ternary CH refined with riding coordinates:
 C2(H2A), C8(H8), C9(H9), C10(H10), C11(H11), C13(H13)
2.b Secondary CH2 refined with riding coordinates:
 C3(H3A,H3B), C4(H4A,H4B), C6(H6A,H6B), C7(H7A,H7B), C12(H12A,H12B), C14(H14A,
 H14B)
2.c Idealised Me refined as rotating group:
 C15(H15A,H15B,H15C)
2.d Idealised tetrahedral OH refined as rotating group:
 O2(H2), O3(H3)
;
_atom_sites_solution_hydrogens    geom
_atom_sites_solution_primary      direct
_atom_sites_solution_secondary    ?
loop_
  _atom_site_label
  _atom_site_type_symbol
  _atom_site_fract_x
  _atom_site_fract_y
  _atom_site_fract_z
  _atom_site_U_iso_or_equiv
  _atom_site_adp_type
  _atom_site_occupancy
  _atom_site_site_symmetry_order
  _atom_site_calc_flag
  _atom_site_refinement_flags_posn
  _atom_site_refinement_flags_adp
  _atom_site_refinement_flags_occupancy
  _atom_site_disorder_assembly
  _atom_site_disorder_group
 O1 O 0.0167(4) 0.5458(3) 0.36288(15) 0.0519(8) Uani 1 1 d . . . . .
 O2 O 0.2181(4) 0.8529(3) 0.14778(15) 0.0463(7) Uani 1 1 d . . . . .
 H2 H 0.1442 0.9082 0.1426 0.069 Uiso 1 1 calc GR . . . .
 O3 O 0.4739(4) 0.8319(3) 0.06738(19) 0.0577(9) Uani 1 1 d . . . . .
 H3 H 0.4330 0.8935 0.0949 0.086 Uiso 1 1 calc GR . . . .
 N1 N 0.0880(4) 0.5085(3) 0.23732(16) 0.0356(8) Uani 1 1 d . . . . .
 C1 C 0.1995(4) 0.5113(4) 0.17116(18) 0.0298(8) Uani 1 1 d . . . . .
 C2 C 0.3654(5) 0.5539(4) 0.19624(19) 0.0325(8) Uani 1 1 d . . . . .
 H2A H 0.4123 0.4648 0.2159 0.039 Uiso 1 1 calc R . . . .
 C3 C 0.3705(5) 0.6571(4) 0.26500(19) 0.0406(10) Uani 1 1 d . . . . .
 H3A H 0.3208 0.7474 0.2513 0.049 Uiso 1 1 calc R . . . .
 H3B H 0.4778 0.6766 0.2797 0.049 Uiso 1 1 calc R . . . .
 C4 C 0.2837(5) 0.5854(4) 0.3328(2) 0.0431(10) Uani 1 1 d . . . . .
 H4A H 0.3402 0.4999 0.3487 0.052 Uiso 1 1 calc R . . . .
 H4B H 0.2816 0.6509 0.3770 0.052 Uiso 1 1 calc R . . . .
 C5 C 0.1197(5) 0.5444(4) 0.3122(2) 0.0374(9) Uani 1 1 d . . . . .
 C6 C -0.0700(5) 0.5265(4) 0.2054(2) 0.0443(10) Uani 1 1 d . . . . .
 H6A H -0.1427 0.5581 0.2453 0.053 Uiso 1 1 calc R . . . .
 H6B H -0.1080 0.4380 0.1821 0.053 Uiso 1 1 calc R . . . .
 C7 C -0.0444(5) 0.6424(5) 0.1438(2) 0.0503(11) Uani 1 1 d . . . . .
 H7A H -0.0490 0.7373 0.1672 0.060 Uiso 1 1 calc R . . . .
 H7B H -0.1229 0.6361 0.1032 0.060 Uiso 1 1 calc R . . . .
 C8 C 0.1182(5) 0.6129(4) 0.1104(2) 0.0345(9) Uani 1 1 d . . . . .
 H8 H 0.1034 0.5566 0.0626 0.041 Uiso 1 1 calc R . . . .
 C9 C 0.2120(5) 0.7449(4) 0.0878(2) 0.0376(9) Uani 1 1 d . . . . .
 H9 H 0.1643 0.7876 0.0412 0.045 Uiso 1 1 calc R . . . .
 C10 C 0.3812(5) 0.7051(4) 0.0682(2) 0.0365(9) Uani 1 1 d . . . . .
 H10 H 0.3813 0.6667 0.0149 0.044 Uiso 1 1 calc R . . . .
 C11 C 0.4561(5) 0.5888(4) 0.1215(2) 0.0355(9) Uani 1 1 d . . . . .
 H11 H 0.5597 0.6233 0.1369 0.043 Uiso 1 1 calc R . . . .
 C12 C 0.4775(5) 0.4443(4) 0.0785(2) 0.0436(10) Uani 1 1 d . . . . .
 H12A H 0.5281 0.4624 0.0288 0.052 Uiso 1 1 calc R . . . .
 H12B H 0.5464 0.3838 0.1092 0.052 Uiso 1 1 calc R . . . .
 C13 C 0.3254(5) 0.3625(4) 0.0636(2) 0.0399(10) Uani 1 1 d . . . . .
 H13 H 0.2701 0.4123 0.0214 0.048 Uiso 1 1 calc R . . . .
 C14 C 0.2171(5) 0.3601(4) 0.1348(2) 0.0377(9) Uani 1 1 d . . . . .
 H14A H 0.2587 0.2945 0.1737 0.045 Uiso 1 1 calc R . . . .
 H14B H 0.1153 0.3248 0.1191 0.045 Uiso 1 1 calc R . . . .
 C15 C 0.3602(6) 0.2091(4) 0.0352(3) 0.0598(13) Uani 1 1 d . . . . .
 H15A H 0.2640 0.1611 0.0231 0.090 Uiso 1 1 calc GR . . . .
 H15B H 0.4139 0.1572 0.0756 0.090 Uiso 1 1 calc GR . . . .
 H15C H 0.4243 0.2132 -0.0107 0.090 Uiso 1 1 calc GR . . . .

loop_
  _atom_site_aniso_label
  _atom_site_aniso_U_11
  _atom_site_aniso_U_22
  _atom_site_aniso_U_33
  _atom_site_aniso_U_23
  _atom_site_aniso_U_13
  _atom_site_aniso_U_12
 O1 0.057(2) 0.0595(17) 0.0389(15) -0.0051(13) 0.0157(16) -0.0118(16)
 O2 0.0520(19) 0.0389(15) 0.0479(15) -0.0048(13) 0.0051(15) 0.0087(14)
 O3 0.057(2) 0.0390(15) 0.077(2) 0.0024(15) 0.0208(18) -0.0135(15)
 N1 0.032(2) 0.0445(17) 0.0305(15) 0.0035(14) 0.0001(15) -0.0060(15)
 C1 0.030(2) 0.0338(18) 0.0250(16) 0.0028(15) 0.0000(17) -0.0038(18)
 C2 0.032(2) 0.0343(18) 0.0315(18) 0.0011(15) -0.0019(17) -0.0018(18)
 C3 0.040(2) 0.050(2) 0.0314(18) -0.0034(17) -0.0032(19) -0.010(2)
 C4 0.046(3) 0.054(2) 0.0284(17) -0.0031(18) -0.003(2) -0.007(2)
 C5 0.048(3) 0.0332(19) 0.0309(18) 0.0024(15) 0.004(2) -0.0042(19)
 C6 0.033(2) 0.055(2) 0.045(2) 0.007(2) 0.0023(19) -0.005(2)
 C7 0.033(2) 0.062(2) 0.056(3) 0.012(2) 0.000(2) 0.003(2)
 C8 0.035(2) 0.0382(19) 0.0305(17) 0.0031(16) -0.0027(18) 0.0006(18)
 C9 0.045(3) 0.038(2) 0.0303(18) 0.0029(16) 0.0022(19) 0.0038(19)
 C10 0.043(3) 0.0343(19) 0.0324(18) 0.0022(15) 0.008(2) -0.0051(18)
 C11 0.032(2) 0.0389(19) 0.0353(19) -0.0003(17) 0.0024(18) -0.0036(19)
 C12 0.048(3) 0.043(2) 0.039(2) 0.0037(18) 0.007(2) 0.008(2)
 C13 0.048(3) 0.041(2) 0.0312(18) -0.0025(17) -0.0015(19) 0.005(2)
 C14 0.043(2) 0.0348(19) 0.0354(18) -0.0004(16) -0.003(2) -0.0020(19)
 C15 0.075(4) 0.048(2) 0.056(3) -0.017(2) -0.001(3) 0.007(3)

_geom_special_details
;
 All esds (except the esd in the dihedral angle between two l.s. planes)
 are estimated using the full covariance matrix.  The cell esds are taken
 into account individually in the estimation of esds in distances, angles
 and torsion angles; correlations between esds in cell parameters are only
 used when they are defined by crystal symmetry.  An approximate (isotropic)
 treatment of cell esds is used for estimating esds involving l.s. planes.
;
loop_
  _geom_bond_atom_site_label_1
  _geom_bond_atom_site_label_2
  _geom_bond_distance
  _geom_bond_site_symmetry_2
  _geom_bond_publ_flag
 O1 C5 1.238(5) . ?
 O2 H2 0.8200 . ?
 O2 C9 1.436(4) . ?
 O3 H3 0.8200 . ?
 O3 C10 1.422(4) . ?
 N1 C1 1.482(4) . ?
 N1 C5 1.351(4) . ?
 N1 C6 1.471(5) . ?
 C1 C2 1.537(5) . ?
 C1 C8 1.568(5) . ?
 C1 C14 1.545(5) . ?
 C2 H2A 0.9800 . ?
 C2 C3 1.519(5) . ?
 C2 C11 1.531(5) . ?
 C3 H3A 0.9700 . ?
 C3 H3B 0.9700 . ?
 C3 C4 1.532(5) . ?
 C4 H4A 0.9700 . ?
 C4 H4B 0.9700 . ?
 C4 C5 1.499(5) . ?
 C6 H6A 0.9700 . ?
 C6 H6B 0.9700 . ?
 C6 C7 1.522(5) . ?
 C7 H7A 0.9700 . ?
 C7 H7B 0.9700 . ?
 C7 C8 1.532(5) . ?
 C8 H8 0.9800 . ?
 C8 C9 1.517(5) . ?
 C9 H9 0.9800 . ?
 C9 C10 1.534(6) . ?
 C10 H10 0.9800 . ?
 C10 C11 1.553(5) . ?
 C11 H11 0.9800 . ?
 C11 C12 1.542(5) . ?
 C12 H12A 0.9700 . ?
 C12 H12B 0.9700 . ?
 C12 C13 1.531(5) . ?
 C13 H13 0.9800 . ?
 C13 C14 1.532(5) . ?
 C13 C15 1.535(5) . ?
 C14 H14A 0.9700 . ?
 C14 H14B 0.9700 . ?
 C15 H15A 0.9600 . ?
 C15 H15B 0.9600 . ?
 C15 H15C 0.9600 . ?

loop_
  _geom_angle_atom_site_label_1
  _geom_angle_atom_site_label_2
  _geom_angle_atom_site_label_3
  _geom_angle
  _geom_angle_site_symmetry_1
  _geom_angle_site_symmetry_3
  _geom_angle_publ_flag
 C9 O2 H2 109.5 . . ?
 C10 O3 H3 109.5 . . ?
 C5 N1 C1 126.2(3) . . ?
 C5 N1 C6 120.6(3) . . ?
 C6 N1 C1 108.0(3) . . ?
 N1 C1 C2 112.8(3) . . ?
 N1 C1 C8 103.3(3) . . ?
 N1 C1 C14 110.8(3) . . ?
 C2 C1 C8 116.1(3) . . ?
 C2 C1 C14 104.9(3) . . ?
 C14 C1 C8 108.9(3) . . ?
 C1 C2 H2A 104.9 . . ?
 C3 C2 C1 114.0(3) . . ?
 C3 C2 H2A 104.9 . . ?
 C3 C2 C11 119.9(3) . . ?
 C11 C2 C1 106.9(3) . . ?
 C11 C2 H2A 104.9 . . ?
 C2 C3 H3A 110.3 . . ?
 C2 C3 H3B 110.3 . . ?
 C2 C3 C4 107.3(3) . . ?
 H3A C3 H3B 108.5 . . ?
 C4 C3 H3A 110.3 . . ?
 C4 C3 H3B 110.3 . . ?
 C3 C4 H4A 109.0 . . ?
 C3 C4 H4B 109.0 . . ?
 H4A C4 H4B 107.8 . . ?
 C5 C4 C3 112.8(3) . . ?
 C5 C4 H4A 109.0 . . ?
 C5 C4 H4B 109.0 . . ?
 O1 C5 N1 121.6(4) . . ?
 O1 C5 C4 120.1(3) . . ?
 N1 C5 C4 118.3(3) . . ?
 N1 C6 H6A 111.4 . . ?
 N1 C6 H6B 111.4 . . ?
 N1 C6 C7 101.8(3) . . ?
 H6A C6 H6B 109.3 . . ?
 C7 C6 H6A 111.4 . . ?
 C7 C6 H6B 111.4 . . ?
 C6 C7 H7A 110.7 . . ?
 C6 C7 H7B 110.7 . . ?
 C6 C7 C8 105.3(3) . . ?
 H7A C7 H7B 108.8 . . ?
 C8 C7 H7A 110.7 . . ?
 C8 C7 H7B 110.7 . . ?
 C1 C8 H8 106.8 . . ?
 C7 C8 C1 105.4(3) . . ?
 C7 C8 H8 106.8 . . ?
 C9 C8 C1 114.9(3) . . ?
 C9 C8 C7 115.6(3) . . ?
 C9 C8 H8 106.8 . . ?
 O2 C9 C8 113.8(3) . . ?
 O2 C9 H9 108.3 . . ?
 O2 C9 C10 106.9(3) . . ?
 C8 C9 H9 108.3 . . ?
 C8 C9 C10 111.2(3) . . ?
 C10 C9 H9 108.3 . . ?
 O3 C10 C9 109.3(3) . . ?
 O3 C10 H10 107.0 . . ?
 O3 C10 C11 110.6(3) . . ?
 C9 C10 H10 107.0 . . ?
 C9 C10 C11 115.5(3) . . ?
 C11 C10 H10 107.0 . . ?
 C2 C11 C10 115.3(3) . . ?
 C2 C11 H11 107.8 . . ?
 C2 C11 C12 105.9(3) . . ?
 C10 C11 H11 107.8 . . ?
 C12 C11 C10 112.0(3) . . ?
 C12 C11 H11 107.8 . . ?
 C11 C12 H12A 108.7 . . ?
 C11 C12 H12B 108.7 . . ?
 H12A C12 H12B 107.6 . . ?
 C13 C12 C11 114.3(3) . . ?
 C13 C12 H12A 108.7 . . ?
 C13 C12 H12B 108.7 . . ?
 C12 C13 H13 107.4 . . ?
 C12 C13 C14 113.0(3) . . ?
 C12 C13 C15 110.4(3) . . ?
 C14 C13 H13 107.4 . . ?
 C14 C13 C15 110.8(3) . . ?
 C15 C13 H13 107.4 . . ?
 C1 C14 H14A 109.3 . . ?
 C1 C14 H14B 109.3 . . ?
 C13 C14 C1 111.5(3) . . ?
 C13 C14 H14A 109.3 . . ?
 C13 C14 H14B 109.3 . . ?
 H14A C14 H14B 108.0 . . ?
 C13 C15 H15A 109.5 . . ?
 C13 C15 H15B 109.5 . . ?
 C13 C15 H15C 109.5 . . ?
 H15A C15 H15B 109.5 . . ?
 H15A C15 H15C 109.5 . . ?
 H15B C15 H15C 109.5 . . ?

loop_
  _geom_torsion_atom_site_label_1
  _geom_torsion_atom_site_label_2
  _geom_torsion_atom_site_label_3
  _geom_torsion_atom_site_label_4
  _geom_torsion
  _geom_torsion_site_symmetry_1
  _geom_torsion_site_symmetry_2
  _geom_torsion_site_symmetry_3
  _geom_torsion_site_symmetry_4
  _geom_torsion_publ_flag
 O2 C9 C10 O3 -40.3(4) . . . . ?
 O2 C9 C10 C11 85.2(4) . . . . ?
 O3 C10 C11 C2 112.0(3) . . . . ?
 O3 C10 C11 C12 -126.7(3) . . . . ?
 N1 C1 C2 C3 -31.3(4) . . . . ?
 N1 C1 C2 C11 -166.2(3) . . . . ?
 N1 C1 C8 C7 -7.6(4) . . . . ?
 N1 C1 C8 C9 120.9(3) . . . . ?
 N1 C1 C14 C13 177.0(3) . . . . ?
 N1 C6 C7 C8 34.9(4) . . . . ?
 C1 N1 C5 O1 176.3(3) . . . . ?
 C1 N1 C5 C4 -2.8(5) . . . . ?
 C1 N1 C6 C7 -41.6(4) . . . . ?
 C1 C2 C3 C4 57.3(4) . . . . ?
 C1 C2 C11 C10 55.4(4) . . . . ?
 C1 C2 C11 C12 -69.1(4) . . . . ?
 C1 C8 C9 O2 -73.4(4) . . . . ?
 C1 C8 C9 C10 47.4(4) . . . . ?
 C2 C1 C8 C7 -131.6(3) . . . . ?
 C2 C1 C8 C9 -3.2(4) . . . . ?
 C2 C1 C14 C13 -60.9(4) . . . . ?
 C2 C3 C4 C5 -56.5(4) . . . . ?
 C2 C11 C12 C13 54.3(4) . . . . ?
 C3 C2 C11 C10 -76.3(4) . . . . ?
 C3 C2 C11 C12 159.2(3) . . . . ?
 C3 C4 C5 O1 -148.3(3) . . . . ?
 C3 C4 C5 N1 30.7(5) . . . . ?
 C5 N1 C1 C2 2.8(5) . . . . ?
 C5 N1 C1 C8 -123.4(4) . . . . ?
 C5 N1 C1 C14 120.0(4) . . . . ?
 C5 N1 C6 C7 114.4(4) . . . . ?
 C6 N1 C1 C2 157.0(3) . . . . ?
 C6 N1 C1 C8 30.8(4) . . . . ?
 C6 N1 C1 C14 -85.7(4) . . . . ?
 C6 N1 C5 O1 25.0(5) . . . . ?
 C6 N1 C5 C4 -154.1(3) . . . . ?
 C6 C7 C8 C1 -16.8(4) . . . . ?
 C6 C7 C8 C9 -144.9(3) . . . . ?
 C7 C8 C9 O2 49.8(4) . . . . ?
 C7 C8 C9 C10 170.5(3) . . . . ?
 C8 C1 C2 C3 87.7(4) . . . . ?
 C8 C1 C2 C11 -47.2(4) . . . . ?
 C8 C1 C14 C13 64.1(4) . . . . ?
 C8 C9 C10 O3 -165.0(3) . . . . ?
 C8 C9 C10 C11 -39.6(4) . . . . ?
 C9 C10 C11 C2 -12.7(4) . . . . ?
 C9 C10 C11 C12 108.5(4) . . . . ?
 C10 C11 C12 C13 -72.2(4) . . . . ?
 C11 C2 C3 C4 -174.2(3) . . . . ?
 C11 C12 C13 C14 -44.5(4) . . . . ?
 C11 C12 C13 C15 -169.2(3) . . . . ?
 C12 C13 C14 C1 47.4(4) . . . . ?
 C14 C1 C2 C3 -152.0(3) . . . . ?
 C14 C1 C2 C11 73.2(3) . . . . ?
 C14 C1 C8 C7 110.2(3) . . . . ?
 C14 C1 C8 C9 -121.3(3) . . . . ?
 C15 C13 C14 C1 171.9(3) . . . . ?

_shelx_SHELXL_version_number      '2014/7'
_iucr_refine_instructions_details
;

    xushy_0722_1.res created by SHELXL-2014/7

TITL xushy_0722_1 in P212121 #19
REM reset to P212121 #19
CELL 0.71073 8.57307 9.296856 17.107929 90 90 90
ZERR 4 0.000526 0.000375 0.00073 0 0 0
LATT -1
SYMM 0.5-X,-Y,0.5+Z
SYMM 0.5+X,0.5-Y,-Z
SYMM -X,0.5+Y,0.5-Z
SFAC C H N O
UNIT 60 92 4 12
 
L.S. 8
PLAN  20
BOND
HTAB
CONF
MORE -1
BOND $H
CONF
fmap 2
acta 51.0
SHEL 999 0.81
REM <olex2.extras>
REM <HklSrc "%.\\xushy_0722_1.hkl">
REM </olex2.extras>
 
WGHT    0.032500    0.162300
FVAR       9.61923
O1    4    0.016704    0.545837    0.362884    11.00000    0.05717    0.05951 =
         0.03890   -0.00512    0.01568   -0.01181
O2    4    0.218050    0.852914    0.147778    11.00000    0.05200    0.03890 =
         0.04789   -0.00478    0.00506    0.00868
AFIX 147
H2    2    0.144193    0.908152    0.142634    11.00000   -1.50000
AFIX   0
O3    4    0.473903    0.831935    0.067375    11.00000    0.05694    0.03901 =
         0.07704    0.00236    0.02078   -0.01353
AFIX 147
H3    2    0.432951    0.893459    0.094915    11.00000   -1.50000
AFIX   0
N1    3    0.088046    0.508535    0.237320    11.00000    0.03174    0.04449 =
         0.03055    0.00349    0.00010   -0.00601
C1    1    0.199546    0.511270    0.171164    11.00000    0.03049    0.03379 =
         0.02499    0.00282    0.00004   -0.00382
C2    1    0.365394    0.553904    0.196244    11.00000    0.03173    0.03430 =
         0.03146    0.00115   -0.00192   -0.00183
AFIX  13
H2A   2    0.412261    0.464798    0.215867    11.00000   -1.20000
AFIX   0
C3    1    0.370544    0.657123    0.264997    11.00000    0.04034    0.05014 =
         0.03143   -0.00340   -0.00316   -0.00981
AFIX  23
H3A   2    0.320805    0.747365    0.251264    11.00000   -1.20000
H3B   2    0.477768    0.676624    0.279674    11.00000   -1.20000
AFIX   0
C4    1    0.283658    0.585427    0.332823    11.00000    0.04648    0.05441 =
         0.02840   -0.00310   -0.00269   -0.00654
AFIX  23
H4A   2    0.340159    0.499868    0.348678    11.00000   -1.20000
H4B   2    0.281596    0.650861    0.376973    11.00000   -1.20000
AFIX   0
C5    1    0.119661    0.544445    0.312169    11.00000    0.04809    0.03321 =
         0.03086    0.00240    0.00439   -0.00420
C6    1   -0.070021    0.526495    0.205374    11.00000    0.03283    0.05472 =
         0.04539    0.00676    0.00230   -0.00481
AFIX  23
H6A   2   -0.142738    0.558101    0.245273    11.00000   -1.20000
H6B   2   -0.107963    0.437999    0.182125    11.00000   -1.20000
AFIX   0
C7    1   -0.044392    0.642371    0.143836    11.00000    0.03340    0.06178 =
         0.05565    0.01225    0.00040    0.00268
AFIX  23
H7A   2   -0.048981    0.737344    0.167199    11.00000   -1.20000
H7B   2   -0.122926    0.636092    0.103162    11.00000   -1.20000
AFIX   0
C8    1    0.118243    0.612940    0.110418    11.00000    0.03485    0.03817 =
         0.03052    0.00311   -0.00273    0.00056
AFIX  13
H8    2    0.103384    0.556581    0.062585    11.00000   -1.20000
AFIX   0
C9    1    0.212000    0.744940    0.087850    11.00000    0.04467    0.03786 =
         0.03033    0.00291    0.00225    0.00376
AFIX  13
H9    2    0.164344    0.787579    0.041222    11.00000   -1.20000
AFIX   0
C10   1    0.381179    0.705086    0.068206    11.00000    0.04288    0.03433 =
         0.03239    0.00222    0.00781   -0.00511
AFIX  13
H10   2    0.381254    0.666655    0.014866    11.00000   -1.20000
AFIX   0
C11   1    0.456131    0.588812    0.121505    11.00000    0.03214    0.03893 =
         0.03530   -0.00030    0.00242   -0.00360
AFIX  13
H11   2    0.559707    0.623260    0.136899    11.00000   -1.20000
AFIX   0
C12   1    0.477491    0.444339    0.078531    11.00000    0.04835    0.04349 =
         0.03910    0.00366    0.00741    0.00807
AFIX  23
H12A  2    0.528067    0.462434    0.028775    11.00000   -1.20000
H12B  2    0.546406    0.383763    0.109166    11.00000   -1.20000
AFIX   0
C13   1    0.325384    0.362501    0.063594    11.00000    0.04764    0.04098 =
         0.03119   -0.00250   -0.00150    0.00475
AFIX  13
H13   2    0.270124    0.412321    0.021385    11.00000   -1.20000
AFIX   0
C14   1    0.217065    0.360052    0.134781    11.00000    0.04296    0.03482 =
         0.03544   -0.00037   -0.00334   -0.00205
AFIX  23
H14A  2    0.258743    0.294531    0.173651    11.00000   -1.20000
H14B  2    0.115251    0.324814    0.119130    11.00000   -1.20000
AFIX   0
C15   1    0.360167    0.209136    0.035220    11.00000    0.07487    0.04802 =
         0.05645   -0.01725   -0.00091    0.00739
AFIX 137
H15A  2    0.264029    0.161136    0.023076    11.00000   -1.50000
H15B  2    0.413873    0.157159    0.075553    11.00000   -1.50000
H15C  2    0.424348    0.213221   -0.010709    11.00000   -1.50000
AFIX   0
HKLF 4
 
REM  xushy_0722_1 in P212121 #19
REM R1 =  0.0532 for    1994 Fo > 4sig(Fo)  and  0.0722 for all    2540 data
REM    175 parameters refined using      0 restraints
 
END  
     
WGHT      0.0325      0.1557 

REM Instructions for potential hydrogen bonds
EQIV $1 -x, y+1/2, -z+1/2
HTAB O2 O1_$1
HTAB O3 O2
EQIV $2 -x+1, y-1/2, -z+1/2
HTAB C4 O3_$2

REM Highest difference peak  0.144,  deepest hole -0.157,  1-sigma level  0.039
Q1    1   0.2653  0.4775  0.0033  11.00000  0.05    0.14
Q2    1  -0.0514  0.3241  0.1612  11.00000  0.05    0.14
Q3    1   0.4436  0.4149  0.2277  11.00000  0.05    0.14
Q4    1   0.2838  0.1192 -0.0738  11.00000  0.05    0.14
Q5    1  -0.1241  0.7141  0.0869  11.00000  0.05    0.13
Q6    1   0.1974  0.5672  0.1418  11.00000  0.05    0.13
Q7    1   0.3059  0.1330  0.0746  11.00000  0.05    0.13
Q8    1   0.5849  0.4341  0.0366  11.00000  0.05    0.13
Q9    1  -0.1402  0.5761  0.0669  11.00000  0.05    0.13
Q10   1   0.5344  0.6512  0.2790  11.00000  0.05    0.12
Q11   1   0.3285  0.4152  0.3510  11.00000  0.05    0.12
Q12   1   0.4476  0.3569  0.3125  11.00000  0.05    0.12
Q13   1  -0.1935  0.6621  0.0371  11.00000  0.05    0.12
Q14   1   0.3320  0.5711 -0.0660  11.00000  0.05    0.12
Q15   1   0.0740  0.7869  0.2376  11.00000  0.05    0.12
Q16   1   0.1975  0.4455  0.1474  11.00000  0.05    0.12
Q17   1   0.5188  0.6565  0.3521  11.00000  0.05    0.12
Q18   1   0.0120  0.6567  0.3992  11.00000  0.05    0.11
Q19   1  -0.1302  0.2655  0.2039  11.00000  0.05    0.11
Q20   1  -0.2296  0.7522  0.1842  11.00000  0.05    0.11

  REM The information below was added by Olex2.
  REM
  REM R1 = 0.0532 for 1994 Fo > 4sig(Fo) and 0.0722 for all 3872 data
  REM n/a parameters refined using n/a restraints
  REM Highest difference peak 0.14, deepest hole -0.16
  REM Mean Shift 0, Max Shift 0.000.
  
  REM +++ Tabular Listing of Refinement Information +++
  REM R1_all = 0.0722
  REM R1_gt = 0.0532
  REM wR_ref = 0.1118
  REM GOOF = 1.089
  REM Shift_max = 0.000
  REM Shift_mean = 0
  REM Reflections_all = 3872
  REM Reflections_gt = 1994
  REM Parameters = n/a
  REM Hole = -0.16
  REM Peak = 0.14
  REM Flack = 1.6(10)
  
  
;
_olex2_date_sample_data_collection 2016-07-25
_olex2_submission_special_instructions 'No special instructions were received'
loop_
  _refln_index_h
  _refln_index_k
  _refln_index_l
  _refln_F_squared_meas
  _refln_F_squared_sigma
  _refln_scale_group_code
 0 0 -3 -28.162 68.4598 1
 0 0 -4 809771 4658.73 1
 0 0 -5 293.57 130.133 1
 0 0 -6 14216.4 782.454 1
 0 0 -7 1916.1 358.028 1
 0 0 -8 3967.76 492.528 1
 0 0 -9 384.67 229.118 1
 0 0 -10 92585.1 2618.55 1
 0 0 -11 2790.4 554.861 1
 0 0 -12 6424.49 822.063 1
 0 0 -13 6749.24 883.156 1
 0 0 -14 20680.6 1567.03 1
 0 0 -15 4921.16 854.027 1
 0 0 -16 16433.9 1534.18 1
 0 0 -17 1583.28 558.943 1
 0 0 -18 6769.25 1082.73 1
 0 0 -19 -298.511 287.815 1
 0 0 -20 2498.42 728.953 1
 0 0 -21 18.4875 224.12 1
 0 0 -22 363.56 285.856 1
 0 1 -3 73904.1 1399.63 1
 0 1 -4 10637.4 602.276 1
 0 1 -5 240385 3088.88 1
 0 1 -6 40190.9 1376.3 1
 0 1 -7 4652.57 528.161 1
 0 -1 -7 5173.82 491.18 1
 0 -1 -8 166723 2944.27 1
 0 1 -8 157580 3181.62 1
 0 -1 -9 1313.92 310.108 1
 0 1 -9 939.125 287.085 1
 0 1 -10 3376.97 557.026 1
 0 -1 -10 4343.35 553.139 1
 0 1 -11 11128.4 1009.85 1
 0 -1 -11 11642.7 950.178 1
 0 1 -12 3893.41 656.385 1
 0 -1 -12 5499.76 710.446 1
 0 1 -13 2932.85 593.81 1
 0 -1 -13 3700.53 624.641 1
 0 -1 -14 3411.68 631.747 1
 0 1 -14 3013.64 622.298 1
 0 -1 -15 5825.93 855.389 1
 0 1 -15 6720.82 963.534 1
 0 1 -16 357.522 290.36 1
 0 -1 -16 -64.013 309.845 1
 0 -1 -17 2410.5 633.722 1
 0 1 -17 3334.34 758.905 1
 0 -1 -18 2795.18 682.253 1
 0 1 -18 3027.66 743.611 1
 0 -1 -19 2603.58 693.365 1
 0 1 -19 2742.93 747.771 1
 0 -1 -20 2225.1 665.238 1
 0 1 -20 3273.65 850.492 1
 0 1 -21 451.127 382.256 1
 0 -1 -21 389.665 331.393 1
 0 -1 -22 37.1982 222.615 1
 0 2 0 246943 2817.48 2
 0 2 0 250650 2257.84 1
 0 -2 0 250549 2131.88 1
 0 2 1 325199 3325.17 2
 0 2 1 333072 2375.5 1
 0 2 -1 318615 2813.31 1
 0 -2 -1 321319 2351.51 1
 0 -2 -2 926344 4140.92 1
 0 2 -2 859436 5047.78 1
 0 2 -3 136794 2188.49 1
 0 2 -4 4990.44 456.502 1
 0 2 -5 40195.4 1392.62 1
 0 2 -6 125670 2634.86 1
 0 2 -7 9708.86 790.348 1
 0 2 -8 692.224 245.518 1
 0 -2 -9 4799.26 530.109 1
 0 2 -9 5380.45 675.674 1
 0 -2 -10 11628.4 877.513 1
 0 2 -10 13621.2 1113.31 1
 0 2 -11 53322.5 2315.62 1
 0 -2 -11 52039 1955.03 1
 0 -2 -12 2911.22 530.38 1
 0 2 -12 2275.64 563.197 1
 0 2 -13 12575.3 1228.08 1
 0 -2 -13 13392 1120.64 1
 0 -2 -14 4263.47 686.792 1
 0 2 -14 5800.82 899.995 1
 0 -2 -15 16764.6 1403.09 1
 0 2 -15 15848.1 1505.77 1
 0 2 -16 6470.64 1011.54 1
 0 -2 -16 7289.05 970.463 1
 0 -2 -17 2241.16 570.398 1
 0 2 -17 1236.45 448.835 1
 0 2 -18 -361.88 474.026 1
 0 -2 -18 15.6782 246.525 1
 0 -2 -19 295.048 363.844 1
 0 2 -19 158.146 304.066 1
 0 2 -20 72.0625 203.273 1
 0 -2 -20 560.974 437.603 1
 0 -2 -21 180.971 290.677 1
 0 2 -21 517.406 413.703 1
 0 -2 -22 579.696 405.72 1
 0 3 0 75.943 79.0062 1
 0 -3 0 19.3268 41.1288 1
 0 3 0 -73.5416 114.089 2
 0 -3 -1 45594.7 1043.48 1
 0 3 -1 43621.8 1246.9 1
 0 -3 1 46236.5 1164.06 1
 0 3 1 44264.5 1508.71 2
 0 3 1 44444.5 1120.27 1
 0 3 2 312.588 153.249 2
 0 -3 2 131.702 75.6467 1
 0 3 2 259.646 95.3321 1
 0 -3 -2 189.047 75.3205 1
 0 3 -2 189.648 121.863 1
 0 3 -3 1873.5 324.182 1
 0 -3 -3 1714.06 229.339 1
 0 3 -4 27952.7 1194.19 1
 0 -3 -4 25896.2 918.228 1
 0 -3 -5 18718.4 852.782 1
 0 3 -5 18274 1026.96 1
 0 3 -6 301570 4403.9 1
 0 3 -7 28140.2 1440.19 1
 0 3 -8 14164.6 1083.4 1
 0 3 -9 62307.3 2365.06 1
 0 3 -10 312.487 236.348 1
 0 -3 -10 518.626 177.861 1
 0 -3 -11 12986.1 953.27 1
 0 3 -11 13653.3 1229.17 1
 0 -3 -12 2938.68 499.103 1
 0 3 -12 2986.51 628.412 1
 0 3 -13 41108.9 2291.61 1
 0 -3 -13 42087.5 1938.18 1
 0 -3 -14 32137.7 1788.05 1
 0 3 -14 30194.4 2069.52 1
 0 -3 -15 1703.68 449.532 1
 0 3 -15 1559.82 593.124 1
 0 -3 -16 8945.8 1053.12 1
 0 3 -16 10264.3 1321.55 1
 0 3 -17 24.0072 403.867 1
 0 -3 -17 42.5129 144.66 1
 0 3 -18 998.45 492.532 1
 0 -3 -18 523.587 302.878 1
 0 3 -19 5867.89 1121.03 1
 0 -3 -19 5628.95 952.373 1
 0 3 -20 1196.44 592.739 1
 0 -3 -20 1380.24 527.457 1
 0 4 0 35830.3 1544.28 2
 0 -4 0 32938.1 1041.12 1
 0 4 0 31423.8 1181.67 1
 0 4 1 256698 3218.14 1
 0 4 -1 258897 3534.38 1
 0 4 1 265705 4286.63 2
 0 -4 -1 260344 2857.13 1
 0 -4 1 256227 3089.05 1
 0 4 2 44980.1 1805.73 2
 0 4 -2 44437.8 1519.44 1
 0 -4 -2 43364.6 1137.21 1
 0 4 2 43459.6 1206.08 1
 0 4 3 333.938 186.226 2
 0 -4 -3 214.195 94.7594 1
 0 4 -3 126.378 214.141 1
 0 -4 -4 230954 2938.38 1
 0 4 -4 230810 3818.43 1
 0 -4 -5 203361 2953.66 1
 0 4 -5 205724 3762.29 1
 0 -4 -6 538.004 180.921 1
 0 4 -6 734.467 281.717 1
 0 4 -7 11384.9 996.309 1
 0 4 -8 52253.8 2170.88 1
 0 4 -9 241.599 276.793 1
 0 4 -10 26463.7 1696.8 1
 0 4 -11 5015 808.632 1
 0 -4 -11 3426.69 478.741 1
 0 4 -12 13554.8 1327.67 1
 0 -4 -12 14296.9 1037.97 1
 0 4 -13 7163.57 1050.76 1
 0 -4 -13 5305.26 666.618 1
 0 -4 -14 10344.2 985.392 1
 0 4 -14 9635.81 1222.42 1
 0 4 -15 10248.5 1302.08 1
 0 -4 -15 8406.37 933.65 1
 0 -4 -16 1898.23 495.742 1
 0 4 -16 2095.51 665.409 1
 0 -4 -17 1457.88 446.157 1
 0 4 -17 2137.44 670.382 1
 0 4 -18 4221.81 961.147 1
 0 4 -19 -90.1689 429.8 1
 0 4 -20 797.454 498.545 1
 0 5 0 195.076 184.924 2
 0 5 0 137.992 149.346 1
 0 5 1 29778.3 1219.93 1
 0 -5 -1 29639.1 1045.34 1
 0 5 1 28955.1 1609.11 2
 0 5 -1 28304.8 1315.6 1
 0 5 -1 30374.9 1616.79 2
 0 5 2 10785.1 992.775 2
 0 5 2 10111 658.969 1
 0 5 -2 9277.31 788.579 1
 0 -5 -2 9764.74 582.77 1
 0 5 3 11663.1 1052.05 2
 0 5 3 13022.6 678.554 1
 0 -5 -3 11624.8 637.945 1
 0 5 -3 13705.1 996.209 1
 0 5 -4 74481.9 2398.67 1
 0 -5 -4 74245.9 1696.22 1
 0 -5 -5 6736.67 543.734 1
 0 5 -5 6320.57 738.867 1
 0 -5 -6 19686.6 995.787 1
 0 5 -6 20911.5 1386.36 1
 0 5 -7 79619.7 2772.42 1
 0 5 -8 110.936 309.774 1
 0 5 -9 23080.2 1632.11 1
 0 5 -10 31385.8 1968.76 1
 0 5 -11 477.933 373.459 1
 0 -5 -11 526.898 212.476 1
 0 5 -12 2738.48 627.155 1
 0 -5 -12 3189.34 479.607 1
 0 5 -13 1164.63 504.849 1
 0 -5 -13 1719.01 382.166 1
 0 5 -14 19856.4 1826.6 1
 0 5 -15 -85.851 407.811 1
 0 5 -16 380.881 339.047 1
 0 5 -17 2658.72 761.819 1
 0 5 -18 -279.597 283.247 1
 0 5 -19 -82.014 257.893 1
 0 6 0 50031 1848.62 1
 0 6 0 49510.6 2321.05 2
 0 6 1 94464 2359.39 1
 0 6 -1 92879 3127.33 2
 0 6 1 91322.7 3177.87 2
 0 6 -1 91526.7 2619.13 1
 0 6 -2 13071.7 1031.18 1
 0 6 2 13083.5 1205.84 2
 0 6 2 12756.1 810.868 1
 0 6 -2 13281.1 1233.07 2
 0 -6 -2 13094.7 695.24 1
 0 -6 -3 1816.04 263.982 1
 0 6 -3 3510.81 571.053 1
 0 6 3 3506.79 398.575 1
 0 6 3 3769.48 710.719 2
 0 -6 -4 13907.7 714.762 1
 0 6 -4 16067.2 1215.86 1
 0 -6 -5 1055.02 212.765 1
 0 6 -5 1152.38 363.931 1
 0 6 -6 5485.86 814.235 1
 0 6 -7 35668.9 2000.99 1
 0 6 -8 -15.234 206.952 1
 0 6 -9 1274.43 495.04 1
 0 6 -10 35915.9 2241.82 1
 0 6 -11 755.495 396.464 1
 0 6 -12 491.838 375.658 1
 0 6 -13 10553.7 1360.57 1
 0 6 -14 4341.25 892.633 1
 0 6 -15 324.88 307.684 1
 0 6 -16 1155.68 596.172 1
 0 6 -17 12597.3 1682.18 1
 0 6 -18 885.353 529.98 1
 0 7 0 2541.63 689.017 2
 0 7 0 2257.96 459.145 1
 0 7 1 3496.48 497.719 1
 0 7 -1 3477.64 676.58 2
 0 7 -1 3696.34 571.105 1
 0 7 1 3583.29 721.344 2
 0 7 -2 216.337 298.346 2
 0 7 2 569.656 301.74 2
 0 7 2 640.862 201.049 1
 0 7 -2 1083.52 341.931 1
 0 7 -3 3820.12 767.029 2
 0 7 3 3194.02 389.435 1
 0 7 -3 3024.36 573.615 1
 0 7 3 3479.39 679.809 2
 0 7 -4 11246.4 1101.52 1
 0 7 -5 25098.1 1707.61 1
 0 7 -6 49.0036 229.613 1
 0 7 -7 9668.78 1145.39 1
 0 7 -8 14684.3 1422.98 1
 0 7 -9 15252 1497.96 1
 0 7 -10 2932 691.825 1
 0 7 -11 767.65 469.435 1
 0 7 -12 732.947 400.765 1
 0 7 -13 1384.86 538.821 1
 0 7 -14 -724.303 440.775 1
 0 7 -15 533.949 463.313 1
 0 7 -16 4292.8 988.529 1
 0 7 -17 -557.447 405.415 1
 0 8 0 1374.68 575.088 2
 0 8 -1 -495.768 442.61 2
 0 8 -1 -125.462 229.092 1
 0 8 1 -32.0971 260.971 2
 0 8 -2 2314.26 527.669 1
 0 8 2 1806.68 583.635 2
 0 8 -3 75760.5 3006.88 1
 0 8 3 76433.9 3525.5 2
 0 8 -3 77418.9 3450.3 2
 0 8 -4 4834.72 817.686 1
 0 8 -4 5004.72 927.924 2
 0 8 -5 67.2824 218.043 1
 0 8 -5 553.897 390.877 2
 0 8 -6 58.3166 216.226 1
 0 8 -7 571.122 374.582 1
 0 8 -8 15724.7 1583.34 1
 0 8 -9 663.896 429.949 1
 0 8 -10 29.3925 248.541 1
 0 8 -11 3935.4 883.027 1
 0 8 -12 998.348 496.042 1
 0 8 -13 1139.4 474.812 1
 0 8 -14 -64.8052 296.719 1
 0 8 -15 -207.436 381.695 1
 0 8 -16 1339.38 662.056 1
 0 9 0 -199.172 382.146 2
 0 9 -1 -118.849 297.192 2
 0 9 1 392.809 381.565 2
 0 9 2 20372.4 1951.23 2
 0 9 -2 18543.7 1831.54 2
 0 9 -3 2119.72 647.078 2
 0 9 3 3288.41 845.483 2
 0 9 -4 -59.175 316.998 2
 0 9 -5 6602.09 1125.46 2
 0 9 -6 2053.12 684.067 2
 0 9 -6 953.214 406.904 1
 0 9 -7 1954.08 714.432 2
 0 9 -7 767.691 383.559 1
 0 9 -8 587.052 342.906 1
 0 9 -9 772.52 450.194 1
 0 9 -10 15.5719 252.788 1
 0 9 -11 2572.29 736.925 1
 0 9 -12 1762.99 650.52 1
 0 9 -13 197.578 273.383 1
 0 9 -14 13.0773 288.043 1
 0 9 -15 7920.66 1430.42 1
 0 10 0 14564.8 1761.49 2
 0 10 1 1690.54 632.532 2
 0 10 -1 1195.07 629.549 2
 0 10 -2 1107.27 557.117 2
 0 10 2 315.261 371.328 2
 0 10 -3 826.131 504.362 2
 0 10 -4 3077.64 845.609 2
 0 10 -5 1754.32 675.789 2
 0 10 -6 -191.421 336.221 2
 0 10 -7 485.422 376.137 2
 0 10 -8 962.938 541.311 2
 0 10 -9 2787.94 853.351 2
 0 10 -10 449.601 414.949 2
 0 10 -13 593.173 429.337 1
 0 11 0 958.532 565.392 2
 0 11 1 -687.644 506.255 2
 0 11 -1 61.719 365.207 2
 0 11 -2 -80.3123 381.233 2
 0 11 -3 605.143 422.516 2
 0 11 -4 3231.99 917.548 2
 0 11 -5 272.418 391.728 2
 0 11 -6 299.777 357.369 2
 0 11 -7 1945.09 763.511 2
 -1 0 -2 999999 5088.19 1
 -1 0 -3 341565 3224.82 1
 -1 0 -4 334810 3450.27 1
 -1 0 -5 699749 5356.42 1
 -1 0 -6 377.208 169.569 1
 -1 0 -7 7305.38 642.555 1
 -1 0 -8 6024.4 633.907 1
 -1 0 -9 96797.9 2646.79 1
 -1 0 -10 461.893 277.511 1
 -1 0 -11 12961.2 1098.28 1
 1 0 -11 14223.7 1093.79 1
 -1 0 -12 12091.9 1096.93 1
 1 0 -12 13892.2 1153 1
 1 0 -13 60.1973 257.76 1
 -1 0 -13 -236.572 304.529 1
 -1 0 -14 164.804 252.028 1
 1 0 -14 270.819 268.524 1
 1 0 -15 185.661 355.454 1
 -1 0 -15 -76.1781 303.998 1
 1 0 -16 5091.22 867.277 1
 -1 0 -16 4730.81 843.82 1
 1 0 -17 617.458 350.285 1
 -1 0 -17 360.156 284.605 1
 -1 0 -18 708.927 443.697 1
 1 0 -18 -108.211 267.131 1
 1 0 -19 7648.7 1169.88 1
 -1 0 -19 12036.1 1499.32 1
 1 0 -20 -224.303 334.514 1
 -1 0 -20 -57.8204 214.456 1
 1 0 -21 522.472 382.133 1
 -1 0 -21 55.6333 201.819 1
 1 0 -22 -313.265 344.302 1
 -1 0 -22 98.9347 249.856 1
 -1 -1 -22 -2.84836 242.826 1
 -1 -1 -21 141.506 306.677 1
 1 1 -21 -115.64 293.236 1
 1 1 -20 4725.52 994.623 1
 -1 -1 -20 3251.02 817.502 1
 1 1 -19 3679.3 849.703 1
 -1 -1 -19 2280.82 690.57 1
 -1 -1 -18 4745.59 889.652 1
 1 1 -18 6700.69 1075.87 1
 -1 -1 -17 2671.28 666.559 1
 1 1 -17 2044.5 624.554 1
 -1 -1 -16 12098.3 1300.88 1
 1 1 -16 13379.4 1405.48 1
 1 1 -15 31251.9 2037.19 1
 -1 -1 -15 30399.4 1950.13 1
 1 1 -14 28073.8 1856.25 1
 -1 -1 -14 24774.6 1693.43 1
 1 1 -13 15816.2 1311.64 1
 -1 -1 -13 12068 1127.11 1
 1 1 -12 7250.05 870.743 1
 -1 -1 -12 7661.25 845.677 1
 1 1 -11 12113.7 1037.5 1
 -1 -1 -11 12716.3 1036.19 1
 -1 -1 -10 13821.2 1008.71 1
 1 1 -10 13619.2 1063.79 1
 -1 -1 -9 17103.5 1062.33 1
 1 1 -9 16088.7 1075.03 1
 -1 -1 -8 13668.2 885.944 1
 -1 -1 -7 54187 1609.29 1
 -1 -1 -6 2932.98 346.003 1
 -1 -1 -5 49007.7 1289.86 1
 -1 -1 -4 25533.2 839.892 1
 -1 -1 -3 8979.87 438.851 1
 -1 -1 -2 127123 1432.54 1
 -1 1 1 253562 2783.57 1
 1 1 -1 256233 2420.77 2
 -1 1 -1 254915 2917.13 1
 1 1 2 127836 1361.53 1
 -1 1 -2 123303 2111.69 1
 -1 1 -3 10231.6 647.847 1
 1 1 3 9232.02 411.103 1
 -1 1 -4 24239.3 1051.83 1
 1 1 4 24525.7 756.21 1
 -1 1 -5 46501.5 1544.83 1
 1 1 5 45597.5 1140.03 1
 -1 1 -6 2286.88 379.464 1
 -1 1 -7 57280.7 1916.35 1
 -1 1 -8 14707.4 1026.03 1
 -1 1 -9 14822.2 1098.97 1
 -1 1 -10 12539.3 1058.44 1
 -1 1 -11 11443.1 1066.11 1
 -1 1 -12 8243.51 948.84 1
 1 -1 -13 17204.1 1297.2 1
 -1 1 -13 15316 1362.81 1
 -1 1 -14 24009.1 1761.15 1
 1 -1 -14 23083.9 1604.78 1
 -1 1 -15 30750.2 2097.84 1
 1 -1 -15 29854.5 1888.97 1
 -1 1 -16 15800.7 1562.98 1
 1 -1 -16 12141.9 1276.2 1
 -1 1 -17 2349.9 638.852 1
 1 -1 -17 2821.22 662.991 1
 1 -1 -18 4818.31 894.916 1
 -1 1 -18 3872.61 855.7 1
 -1 1 -19 3109.12 824.064 1
 1 -1 -19 2840.95 702.996 1
 -1 1 -20 5054.89 1053.2 1
 1 -1 -20 3968.95 868.719 1
 1 -1 -21 -120.345 213.204 1
 -1 1 -21 379.754 405.89 1
 1 -1 -22 -665.241 452.45 1
 -1 -2 -22 329.239 311.662 1
 1 2 -21 54.821 348.153 1
 -1 -2 -21 789.084 380.869 1
 1 2 -20 188.445 339.828 1
 -1 -2 -20 132.625 266.977 1
 -1 -2 -19 1088.67 473.334 1
 1 2 -19 1384.7 600.568 1
 1 2 -18 2481.3 689.786 1
 -1 -2 -18 2529.1 648.763 1
 -1 -2 -17 1108.8 436.218 1
 1 2 -17 3444.77 812.895 1
 -1 -2 -16 7162.47 979.873 1
 1 2 -16 8859.23 1178.06 1
 1 2 -15 2522.12 610.396 1
 -1 -2 -15 2556.85 591.812 1
 -1 -2 -14 5491.85 781.656 1
 1 2 -14 6418.63 928.616 1
 1 2 -13 31959.5 1931.31 1
 -1 -2 -13 31166.5 1747.02 1
 1 2 -12 1460.07 475.631 1
 -1 -2 -12 1885.52 443.688 1
 1 2 -11 31597.7 1744.13 1
 -1 -2 -11 32094 1581.66 1
 -1 -2 -10 7709.22 732.391 1
 1 2 -10 6797.19 784.479 1
 1 2 -9 39861.3 1753.31 1
 -1 -2 -9 38685.1 1505.88 1
 1 2 -8 22191.9 1234.42 1
 -1 -2 -8 22224.6 1063.59 1
 -1 -2 -7 40968.2 1307.08 1
 1 2 -7 38979.6 1505.79 1
 1 2 -6 22875.9 1091.38 1
 -1 -2 -6 22429.6 877.805 1
 1 2 -5 54280.2 1546 1
 -1 -2 -5 52345.5 1200.3 1
 -1 -2 -4 159390 1751.87 1
 -1 -2 -3 275025 1882.76 1
 -1 2 3 271258 2802.33 2
 -1 2 2 146540 1991.71 2
 -1 2 2 146002 2368.27 1
 1 2 -1 358141 3724.06 2
 -1 2 1 353228 3777.96 1
 -1 2 0 130660 2352.43 1
 1 2 0 135916 2371.92 2
 -1 2 -1 361712 3978.92 1
 -1 2 -2 146977 2635.67 1
 1 -2 -2 145506 2465.95 1
 1 -2 -3 278300 2651.07 2
 -1 2 -3 274379 3711.17 1
 1 -2 -3 274625 3471.63 1
 1 -2 -4 158537 2135.6 2
 1 -2 -4 156694 2761.46 1
 -1 2 -4 159457 2997.74 1
 -1 2 -5 52321 1811.35 1
 -1 2 -6 26307 1344.51 1
 -1 2 -7 40013.5 1725.62 1
 -1 2 -8 23790.4 1407.1 1
 -1 2 -9 40197.2 1925.74 1
 -1 2 -10 6473.18 843.289 1
 -1 2 -11 32344.5 1873.44 1
 -1 2 -12 2333.03 577.782 1
 -1 2 -13 30618.5 2011.45 1
 1 -2 -14 6643.13 851.704 1
 -1 2 -14 5768.24 906.778 1
 1 -2 -15 3031.02 602.489 1
 -1 2 -15 2364.16 625.921 1
 -1 2 -16 7740.25 1142.12 1
 1 -2 -16 8525.94 1053.78 1
 1 -2 -17 1517.21 482.521 1
 -1 2 -17 2860.86 758.892 1
 1 -2 -18 2708.31 661.578 1
 -1 2 -18 1590.23 656.078 1
 -1 2 -19 388.64 350.237 1
 1 -2 -19 757.126 385.032 1
 -1 2 -20 532.894 397.331 1
 1 -2 -20 194.928 275.847 1
 1 -2 -21 450.684 376.167 1
 -1 2 -21 1125.73 530.866 1
 1 -2 -22 423.531 383.938 1
 1 3 -20 4470.06 997.774 1
 -1 -3 -19 1819.14 562.614 1
 1 3 -19 1717.01 607.389 1
 -1 -3 -18 412.792 218.004 1
 1 3 -18 199.47 335.12 1
 -1 -3 -17 2894.32 642.135 1
 1 3 -17 4134.79 883.056 1
 -1 -3 -16 3880.06 702.893 1
 1 3 -16 6398.88 1031.46 1
 -1 -3 -15 9787.86 1052.21 1
 1 3 -15 10360 1244.34 1
 -1 -3 -14 13069.8 1147.23 1
 1 3 -14 14679.1 1412.73 1
 1 3 -13 6512.07 900.391 1
 -1 -3 -13 6193.95 760.331 1
 1 3 -12 10458.1 1087.73 1
 -1 -3 -12 10726.5 938.549 1
 1 3 -11 7302.61 882.876 1
 -1 -3 -11 7271.11 730.78 1
 -1 -3 -10 17710.8 1041.17 1
 1 3 -10 21252.4 1396.97 1
 1 3 -9 4311.67 651.158 1
 -1 -3 -9 3256.06 425.61 1
 -1 -3 -8 24892.2 1045.44 1
 1 3 -8 25544.4 1365.73 1
 -1 -3 -7 42706.7 1252.43 1
 1 3 -7 40296 1640.15 1
 -1 -3 -6 123701 1840.2 1
 1 3 -6 120927 2639.83 1
 -1 -3 -5 132812 1634.14 1
 1 3 -5 138337 2637.92 1
 1 3 -4 67111.3 1700.57 1
 -1 -3 -4 68119.9 903.796 1
 1 3 -3 42001.9 1227.68 1
 -1 3 3 40124.4 1377.42 2
 -1 3 3 39311.2 1359.3 1
 -1 3 2 27371.3 1153.89 1
 1 3 -2 28119.5 1263.43 2
 -1 3 2 29403.4 1145.17 2
 1 3 -2 27085.1 912.497 1
 1 3 -1 215830 2217.91 1
 1 3 -1 210506 3516.42 2
 -1 3 1 207410 3201.31 1
 1 3 0 45567.4 1663.56 2
 1 -3 0 44331 1465.14 1
 1 3 0 46740.7 871.61 1
 -1 3 0 45396.5 1555.64 1
 1 3 1 209022 3636.76 2
 -1 3 -1 209598 3423.93 1
 -1 3 -2 26487.9 1245.66 1
 1 -3 -2 27998.9 1195.22 1
 -1 3 -3 40522.2 1597.63 1
 1 -3 -3 42370.6 1494.81 1
 -1 3 -4 65220 2089.74 1
 -1 3 -5 136952 3166.72 1
 -1 3 -6 123029 3139.17 1
 -1 3 -7 42750.8 1915.73 1
 -1 3 -8 21730.1 1435.83 1
 -1 3 -9 3662.29 645.564 1
 -1 3 -10 19966.4 1496.61 1
 -1 3 -11 8265.28 988.757 1
 -1 3 -12 9404.84 1130.31 1
 -1 3 -13 5198.04 877.173 1
 -1 3 -14 12222.6 1369.22 1
 1 -3 -14 12964.7 1149.81 1
 -1 3 -15 10806.8 1348.85 1
 1 -3 -15 10747.4 1109.44 1
 -1 3 -16 5969.67 1042.51 1
 1 -3 -16 3310.65 657.837 1
 1 -3 -17 3004.24 657.446 1
 -1 3 -17 3468.93 876.219 1
 -1 3 -18 -108.695 372.144 1
 1 -3 -18 682.385 346.113 1
 -1 3 -19 2071.47 769.421 1
 1 -3 -19 2006.81 581.966 1
 -1 3 -20 5034.82 1117.22 1
 1 -3 -20 3790.45 824.975 1
 1 -3 -21 906.619 455.834 1
 1 4 -20 3092.68 907.642 1
 1 4 -19 1007.45 504.907 1
 1 4 -18 2499.8 753.375 1
 1 4 -17 797.606 520.078 1
 -1 -4 -16 7879.97 945.412 1
 1 4 -16 8564.37 1226.68 1
 -1 -4 -15 1744.39 464.444 1
 1 4 -15 1460.58 505.507 1
 1 4 -14 30557.1 2099.16 1
 -1 -4 -14 27611.2 1609.1 1
 -1 -4 -13 437.939 205.614 1
 1 4 -13 -178.702 332.291 1
 -1 -4 -12 4506.82 585.906 1
 1 4 -12 3724.39 721.075 1
 1 4 -11 9318.09 1048.12 1
 -1 -4 -11 8963.63 757.623 1
 -1 -4 -10 12755.4 835.576 1
 1 4 -10 13121.9 1189.74 1
 1 4 -9 7856.9 862.535 1
 -1 -4 -9 7086.78 570.551 1
 1 4 -8 9994.94 921.912 1
 -1 -4 -8 10100.4 614.644 1
 1 4 -7 4960.69 635.937 1
 -1 -4 -7 5052.48 384.322 1
 -1 -4 -6 36928.9 1049.41 1
 -1 -4 -6 36531.2 878.7 1
 1 4 -6 38820.9 1620.88 1
 -1 -4 -5 33004.6 654.779 1
 -1 -4 -5 31524.5 791.319 1
 1 4 -5 31867.7 1377.18 1
 -1 4 4 5040.15 578.955 2
 1 4 -4 6469.32 591.75 1
 -1 4 3 55382.3 1887.68 2
 -1 4 3 55167.4 1719.1 1
 1 4 -3 50484.6 1533.42 1
 -1 4 2 17876.6 1022.81 1
 1 4 -2 17534.7 1142.6 2
 -1 4 2 17323.2 1041.3 2
 1 4 -2 17468.4 821.071 1
 1 4 -1 79664.3 2436.38 2
 1 4 -1 76659.1 1613.74 1
 -1 4 1 78706.6 2177.04 1
 -1 4 1 78231.1 2191.19 2
 1 4 0 129034 1869.37 1
 -1 4 0 131001 2877.68 1
 1 4 0 131053 3161.99 2
 1 4 1 79766.1 2513.59 2
 1 4 1 79332.1 1233.8 1
 -1 4 -1 77868.4 2316.39 1
 -1 4 -2 17108.3 1112.57 1
 -1 4 -3 54375.4 2035.55 1
 -1 4 -4 5964.62 699.295 1
 -1 4 -5 34098.4 1720.13 1
 -1 4 -6 37335.2 1854.4 1
 -1 4 -7 4787.9 706.647 1
 -1 4 -8 9123.11 1007.93 1
 -1 4 -9 6308.06 871.755 1
 -1 4 -10 13061.6 1281.06 1
 -1 4 -11 8766.85 1100.99 1
 -1 4 -12 3950.67 786.662 1
 -1 4 -13 454.954 261.849 1
 -1 4 -14 29239.9 2232.54 1
 1 -4 -15 1919.23 468.232 1
 -1 4 -15 2759.36 735.681 1
 1 -4 -16 6920.05 900.516 1
 -1 4 -16 7533.43 1216.31 1
 1 -4 -17 776.846 341.11 1
 -1 4 -17 771.45 470.223 1
 1 -4 -18 2882.93 652.001 1
 -1 4 -18 3440.8 958.899 1
 1 -4 -19 369.797 240.12 1
 -1 4 -19 1117.64 602.524 1
 -1 4 -20 1700.88 733.53 1
 1 5 -19 1591.08 625.534 1
 1 5 -18 1121.18 607.131 1
 1 5 -17 5455.24 1043.77 1
 1 5 -16 1056.63 476.523 1
 1 5 -15 2594.46 657.709 1
 1 5 -14 7560.22 1080.73 1
 1 5 -13 -129.518 263.609 1
 1 5 -12 9014.55 1077.79 1
 1 5 -11 3940.49 687.083 1
 -1 -5 -11 4665.59 520.143 1
 1 5 -10 12342.3 1173.58 1
 -1 -5 -10 12610.1 771.762 1
 1 5 -9 26886.4 1645.56 1
 -1 -5 -9 24546 980.921 1
 -1 -5 -8 9809.87 549.906 1
 1 5 -8 9550.58 959.227 1
 -1 -5 -7 8866.62 548.302 1
 -1 -5 -7 10280.4 473.057 1
 1 5 -7 10051.8 937.017 1
 -1 -5 -6 25098.5 708.404 1
 -1 -5 -6 25581 572.796 1
 1 5 -6 28335.9 1476.29 1
 1 5 -5 7305.99 733.63 1
 -1 5 4 76493.7 2136.1 1
 -1 5 4 71119.2 2484.54 2
 1 5 -4 74916.4 2167.68 1
 1 5 -3 16428.5 976.577 1
 1 5 -3 15975.2 1244.33 2
 -1 5 3 16177.8 1178.91 2
 -1 5 3 15896.3 1006.95 1
 -1 5 2 36370.2 1723.34 2
 -1 5 2 33548.5 1525.52 1
 1 5 -2 35873.9 1379 1
 1 5 -2 36857.1 1853.04 2
 1 5 -1 28845.9 1145.21 1
 1 5 -1 31248.7 1725.28 2
 -1 5 1 26652.4 1380.33 1
 -1 5 1 28241 1494.02 2
 -1 5 0 733.645 273.463 1
 1 5 0 536.961 158.48 1
 1 5 0 1295.58 452.995 2
 1 5 1 27248.2 886.76 1
 -1 5 -1 28008.5 1499.42 1
 1 5 1 26943.9 1653.38 2
 -1 5 -2 35112.7 1725.65 1
 1 5 2 35580.7 1898.37 2
 -1 5 -3 15895.7 1197.96 1
 -1 5 -4 72282.8 2611.45 1
 -1 5 -5 7123.79 855.114 1
 -1 5 -6 27104.1 1708.41 1
 -1 5 -7 6643.81 873.629 1
 -1 5 -8 7494.97 966.126 1
 -1 5 -9 24493 1786.92 1
 -1 5 -10 13442.4 1377.74 1
 -1 5 -11 5656.41 955.062 1
 -1 5 -12 7457.76 1077.98 1
 -1 5 -13 148.7 206.433 1
 -1 5 -14 7485.04 1184.16 1
 -1 5 -15 3000.44 802.483 1
 1 -5 -15 2838.6 543.806 1
 -1 5 -16 1011.39 489.455 1
 -1 5 -17 4156.61 989.155 1
 -1 5 -18 285.905 379.013 1
 -1 5 -19 79.0843 335.537 1
 1 6 -18 3124.17 863.348 1
 1 6 -17 52.3905 307.07 1
 1 6 -16 1715.4 670.28 1
 1 6 -15 2136.36 649.592 1
 1 6 -14 1561.95 535.375 1
 1 6 -13 4652.48 876.688 1
 1 6 -12 6483.13 988.332 1
 1 6 -11 11165.2 1250.86 1
 1 6 -10 5180.04 831.919 1
 1 6 -9 14328.3 1309.43 1
 1 6 -8 31152.7 1835.98 1
 1 6 -7 893.205 340.396 1
 1 6 -6 1029.74 360.502 1
 1 6 -5 19821.9 1308.1 1
 1 6 -4 15844.3 1349.64 2
 -1 6 4 14645.5 987.136 1
 -1 6 4 15834.4 1312.88 2
 1 6 -4 13650.8 1045.04 1
 1 6 -3 13197.6 1242.61 2
 -1 6 3 10584.3 1058.67 2
 -1 6 3 13234.7 969.062 1
 1 6 -3 11023.5 898.165 1
 -1 6 2 37185.1 1964.39 2
 1 6 -2 33798.6 1468.1 1
 1 6 -2 35580.5 2055.24 2
 -1 6 2 34452.7 1631.81 1
 -1 6 1 46240.2 2170.22 2
 1 6 -1 43634.2 1598.3 1
 1 6 -1 45959.9 2311.77 2
 -1 6 1 41779.4 1873.25 1
 1 6 0 9712.37 688.165 1
 1 6 0 8620.99 1020.59 2
 -1 6 0 8789.9 900.678 1
 -1 6 0 8356.5 919.81 2
 -1 6 -1 45780.2 2086.95 1
 1 6 1 45614.6 1321.62 1
 1 6 1 47298.6 2402.75 2
 1 6 2 35771.8 2121.63 2
 1 6 2 35126.8 849.426 1
 -1 6 -2 32843.5 1808.56 1
 -1 6 -3 12846.1 1161.09 1
 -1 6 -4 15992 1328.41 1
 -1 6 -5 18460.1 1473.12 1
 -1 6 -6 1088.24 430.462 1
 -1 6 -7 1090.64 412.234 1
 -1 6 -8 35533.1 2212.23 1
 -1 6 -9 15404 1487.57 1
 -1 6 -10 4587.18 877.841 1
 -1 6 -11 10752.4 1325.69 1
 -1 6 -12 5746.22 986.702 1
 -1 6 -13 5626.64 1038.41 1
 -1 6 -14 1189.72 523.526 1
 -1 6 -15 2494.32 747.271 1
 -1 6 -16 1112.84 550.183 1
 -1 6 -17 -631.194 464.513 1
 -1 6 -18 2566.49 851.874 1
 1 7 -17 4113.82 983.616 1
 1 7 -16 749.626 436.579 1
 1 7 -15 3269.4 853.618 1
 1 7 -14 5107.96 989.693 1
 1 7 -13 3017.95 744.088 1
 1 7 -12 1372.22 513.927 1
 1 7 -11 2350.99 619.306 1
 1 7 -10 4423.19 837.994 1
 1 7 -9 836.521 357.838 1
 1 7 -8 4695.52 793.539 1
 1 7 -7 10952.8 1138.9 1
 1 7 -6 4824.89 747.935 1
 1 7 -6 5075.89 888.308 2
 1 7 -5 1718.4 433.994 1
 1 7 -5 1441.84 564.204 2
 -1 7 4 9780 1129.52 2
 -1 7 4 9459.1 820.453 1
 1 7 -4 10233.4 1192.71 2
 1 7 -4 10397.5 993.269 1
 1 7 -3 32348.1 2109.76 2
 -1 7 3 28685.6 1926.25 2
 -1 7 3 33802.8 1616.23 1
 1 7 -3 33572.6 1691.99 1
 -1 7 2 12012 1240.59 2
 -1 7 2 14162.8 1116.78 1
 1 7 -2 14415.8 1057.72 1
 1 7 -2 13129 1379.96 2
 -1 7 1 21073.1 1411.98 1
 -1 7 1 21717.3 1654.94 2
 1 7 -1 22329.4 1253.76 1
 1 7 -1 21408.3 1757.77 2
 1 7 0 239.177 278.214 2
 -1 7 0 133.389 239.009 1
 -1 7 0 -96.9092 301.849 2
 1 7 0 152.649 153.372 1
 1 7 1 19769.6 938.472 1
 -1 7 -1 22246.3 1549.8 1
 -1 7 -1 20908.8 1613.39 2
 1 7 1 20019.1 1729.56 2
 -1 7 -2 11149.5 1134.61 1
 1 7 2 12963.7 1417.41 2
 -1 7 -3 31292.9 1947.9 1
 -1 7 -4 12848.7 1281.63 1
 -1 7 -5 744.575 345.557 1
 -1 7 -6 5683.24 899.599 1
 -1 7 -7 12369.9 1369.01 1
 -1 7 -8 4268.73 835.091 1
 -1 7 -9 1914.46 563.511 1
 -1 7 -10 3369.28 773.667 1
 -1 7 -11 1834 582.08 1
 -1 7 -12 1951.32 651.788 1
 -1 7 -13 1326.43 527.468 1
 -1 7 -14 6508.2 1180.85 1
 -1 7 -15 3224.62 900.763 1
 -1 7 -16 -825.506 522.254 1
 -1 7 -17 2323.43 830.76 1
 1 8 -16 2016.83 730.313 1
 1 8 -15 3623.32 912.467 1
 1 8 -14 3448.42 858.896 1
 1 8 -13 -188.656 329.892 1
 1 8 -12 985.32 498.582 1
 1 8 -11 6992.49 1112.76 1
 1 8 -10 1082.19 465.838 1
 1 8 -9 1596.2 508.202 1
 1 8 -8 2421.86 586.519 1
 1 8 -8 2598.19 737.643 2
 1 8 -7 1296.2 485.206 2
 1 8 -7 1073 394.587 1
 1 8 -6 4279.48 855.11 2
 1 8 -6 5151.72 809.907 1
 1 8 -5 9706.93 1076.6 1
 1 8 -5 9228.17 1236.48 2
 1 8 -4 3121.99 588.302 1
 -1 8 4 1926.36 542.293 2
 1 8 -4 2686.58 674.459 2
 1 8 -3 5118.6 722.731 1
 -1 8 3 5264.4 917.804 2
 1 8 -3 4918.99 944 2
 1 8 -2 17179.1 1674.79 2
 -1 8 2 18943.6 1692.88 2
 1 8 -1 27241.7 2156.06 2
 -1 8 1 27400.5 1699.26 1
 -1 8 1 29251.8 2100.75 2
 -1 8 0 46850.4 2629.26 2
 -1 8 0 45307.3 2238.65 1
 1 8 0 45721.5 2742.91 2
 1 8 1 31590.9 2296.13 2
 -1 8 -1 29052 1896.97 1
 -1 8 -1 29783 2098.9 2
 1 8 2 17651.1 1734.06 2
 -1 8 -2 16463.9 1471.11 1
 -1 8 -2 17039.1 1596.89 2
 -1 8 -3 4299.28 786.557 1
 -1 8 -3 4766.27 892.014 2
 -1 8 -4 2030.7 577.583 1
 -1 8 -5 9941.61 1236.72 1
 -1 8 -6 3339.89 734.739 1
 -1 8 -7 1265.64 520.676 1
 -1 8 -8 3197.57 796.715 1
 -1 8 -9 750.466 411.706 1
 -1 8 -10 586.977 386.129 1
 -1 8 -11 6780.67 1176.76 1
 -1 8 -12 792.227 447.207 1
 -1 8 -13 608.896 412.73 1
 -1 8 -14 4855.55 1078.43 1
 -1 8 -15 2048.04 736.991 1
 -1 8 -16 2561.66 834.687 1
 1 9 -15 44.6332 232.379 1
 1 9 -14 84.0884 283.032 1
 1 9 -13 5785.28 1141.35 1
 1 9 -12 3769.37 907.363 1
 1 9 -11 1091.77 474.24 1
 1 9 -11 957.412 530.015 2
 1 9 -10 938.833 446.751 1
 1 9 -10 2645.2 836.884 2
 1 9 -9 1561.17 543.866 1
 1 9 -9 708.534 394.045 2
 1 9 -8 1308.69 499.452 1
 1 9 -8 769.853 510.278 2
 1 9 -7 -35.2938 334.453 2
 1 9 -6 488.559 344.315 2
 1 9 -5 732.231 445.939 2
 -1 9 4 2991.63 760.937 2
 1 9 -4 5315.35 1032.95 2
 1 9 -3 7096.5 1158.11 2
 -1 9 3 6723.7 1118.47 2
 1 9 -2 6050.4 1091.39 2
 -1 9 2 4156.92 885.78 2
 -1 9 1 1463.16 531.001 2
 1 9 -1 3350.77 864.055 2
 -1 9 0 1074.4 464.508 2
 1 9 0 554.327 405.148 2
 -1 9 -1 1862.73 635.226 2
 1 9 1 2463.98 753.647 2
 -1 9 -2 5130.83 984.938 2
 -1 9 -3 6564.1 1092.31 2
 -1 9 -3 7186.7 1063.17 1
 -1 9 -4 3037.61 805.709 2
 -1 9 -4 4052.59 817.787 1
 -1 9 -5 1785.15 598.465 2
 -1 9 -5 1622.58 547.309 1
 -1 9 -6 292.446 286.676 1
 -1 9 -7 374.117 388.666 1
 -1 9 -8 1345.81 569.877 1
 -1 9 -9 1144.08 531.302 1
 -1 9 -10 1962.14 703.337 1
 -1 9 -11 1054.37 576.069 1
 -1 9 -12 4219.85 1007.72 1
 -1 9 -13 6947.15 1314.86 1
 -1 9 -14 -34.5718 226.784 1
 -1 9 -15 413.479 474.689 1
 1 10 -11 1162.41 593.879 2
 1 10 -10 29.2798 396.306 2
 1 10 -9 2071.77 753.021 2
 1 10 -8 1889.83 683.999 2
 1 10 -7 338.22 353.824 2
 1 10 -6 3234.46 880.928 2
 1 10 -5 4625.58 1042.02 2
 1 10 -4 -88.9896 318.011 2
 1 10 -3 1644.53 639.333 2
 -1 10 3 2152.09 713.451 2
 1 10 -2 7237.49 1275.09 2
 -1 10 2 7123.79 1241.83 2
 -1 10 1 -379.146 433.511 2
 1 10 -1 17.3085 283.938 2
 1 10 0 2247.64 749.685 2
 -1 10 0 2754.17 788.229 2
 -1 10 -1 515.436 485.919 2
 1 10 1 396.087 721.557 2
 -1 10 -2 3725.05 887.485 2
 -1 10 -3 2749.82 800.458 2
 -1 10 -4 320.367 340.926 2
 -1 10 -5 6711.13 1193.8 2
 -1 10 -6 2305.74 812.344 2
 -1 10 -7 2186.29 789.664 2
 -1 10 -10 853.321 560.475 1
 -1 10 -11 1368.23 623.091 1
 -1 10 -12 1810.21 723.941 1
 -1 10 -13 2684.44 887.81 1
 1 11 -6 725.826 579.629 2
 1 11 -5 1845.73 712.647 2
 1 11 -4 487.974 413.503 2
 1 11 -3 779.551 423.344 2
 -1 11 2 723.446 454.267 2
 1 11 -2 -401.225 470.189 2
 -1 11 1 1196.8 626.778 2
 1 11 -1 1016.84 524.115 2
 1 11 0 1039.98 604.219 2
 -1 11 0 108.561 371.723 2
 -1 11 -1 1822.25 683.343 2
 -1 11 -2 592.481 462.168 2
 -1 11 -3 -175.664 310.108 2
 -1 11 -4 465.825 473.544 2
 -1 11 -5 608.939 485.107 2
 -1 11 -6 976.635 535.5 2
 -1 12 2 893.39 533.924 2
 -1 12 1 1307.73 686.576 2
 -2 0 0 50891.7 1504.19 1
 -2 0 -1 210894 3085.92 1
 -2 0 1 208562 3007.57 1
 -2 0 -2 4925.04 489.126 1
 -2 0 -3 47061.8 1544.24 1
 -2 0 -4 204.724 156.277 1
 2 0 -4 403.996 77.3385 2
 -2 0 -5 54575.2 1786.55 1
 -2 0 -6 175936 3348.9 1
 -2 0 -7 126820 3008.86 1
 -2 0 -8 14946.8 1089.61 1
 -2 0 -9 53842 2159.2 1
 -2 0 -10 4246.09 651.161 1
 -2 0 -11 11032.5 1076.5 1
 -2 0 -12 25630.4 1700.31 1
 -2 0 -13 31363.6 1960.95 1
 -2 0 -14 12105.7 1295.39 1
 -2 0 -15 86568 3587.19 1
 2 0 -15 86908.4 3325.28 1
 -2 0 -16 6861.28 1063.65 1
 2 0 -16 8763.65 1130.34 1
 2 0 -17 8569.25 1168.76 1
 -2 0 -17 6340.22 1080.21 1
 2 0 -18 3448.73 800.389 1
 -2 0 -18 3438.81 838.614 1
 2 0 -19 -87.7761 265.314 1
 -2 0 -19 -415.233 377.419 1
 2 0 -20 -226.204 363.113 1
 -2 0 -20 522.214 423.539 1
 2 0 -21 1194.32 532.078 1
 -2 0 -21 334.222 410.571 1
 -2 0 -22 -158.39 285.523 1
 -2 -1 -22 -316.267 350.58 1
 2 1 -21 3798.97 907.049 1
 -2 -1 -21 4470.95 1009.98 1
 2 1 -20 1536.33 626.844 1
 -2 -1 -20 1785.48 656.749 1
 2 1 -19 64.7321 341.232 1
 -2 -1 -19 -336.964 323.861 1
 -2 -1 -18 653.166 436.209 1
 2 1 -18 235.64 249.473 1
 -2 -1 -17 9486.37 1273.22 1
 2 1 -17 7736.16 1143.44 1
 -2 -1 -16 3443.1 742.119 1
 2 1 -16 5186.89 909.678 1
 -2 -1 -15 10897.6 1237.8 1
 2 1 -15 11889.3 1313.38 1
 -2 -1 -14 10936.1 1195.42 1
 2 1 -14 11352.3 1219.64 1
 -2 -1 -13 16030.5 1375.47 1
 2 1 -13 16860.1 1382.08 1
 -2 -1 -12 890.866 323.989 1
 -2 -1 -11 7128.82 832.865 1
 -2 -1 -10 3282.21 526.464 1
 -2 -1 -9 18413.3 1201.52 1
 -2 -1 -8 12003.9 918.887 1
 -2 -1 -7 13105.7 905.708 1
 -2 -1 -6 8585.49 690.676 1
 -2 -1 -5 78.6848 107.466 1
 2 1 -4 11369.6 570.025 2
 -2 -1 -4 12457.5 756.638 1
 2 1 -3 2603.87 278.772 2
 -2 -1 -3 3105.73 360.506 1
 -2 -1 -2 121443 2159.05 1
 -2 1 2 122786 2554.09 1
 -2 -1 -1 67296 1544.89 1
 -2 1 1 66298.1 1888.83 1
 -2 1 0 4135.03 483.603 1
 -2 -1 0 3435.27 346.819 1
 2 1 0 3719.66 385.191 1
 2 1 1 68992.9 1599.75 1
 -2 1 -1 68581.7 1954.69 1
 -2 -1 1 70416.3 1513.74 2
 2 1 2 129364 2166.91 1
 -2 1 -2 120573 2623.41 1
 -2 -1 2 127701 1888.05 2
 2 1 3 3078.15 338.87 1
 -2 1 -3 3162.56 455.151 1
 -2 1 -4 10998.4 859.263 1
 2 1 4 11733.6 661.782 1
 -2 1 -5 -19.436 165.965 1
 -2 1 -6 8314.87 797.031 1
 -2 1 -7 13259.1 1047.41 1
 -2 1 -8 11175.4 992.206 1
 -2 1 -9 15733.2 1243.18 1
 -2 1 -10 3340.96 617.152 1
 -2 1 -11 7493.51 956.031 1
 -2 1 -12 1870.53 543.013 1
 -2 1 -13 18255.3 1576.5 1
 -2 1 -14 11985.9 1337.1 1
 -2 1 -15 12176.1 1399.64 1
 2 -1 -16 3505.28 750.984 1
 -2 1 -16 4637.99 926.374 1
 -2 1 -17 10164.8 1380.6 1
 2 -1 -17 7970.96 1102.34 1
 2 -1 -18 909.611 410.845 1
 -2 1 -18 1054.28 582.883 1
 2 -1 -19 418.429 349.036 1
 -2 1 -19 401.494 438.828 1
 -2 1 -20 1363.63 590.448 1
 2 -1 -20 1100.77 512.883 1
 -2 1 -21 3665.39 980.534 1
 2 -1 -21 2139.73 696.103 1
 -2 -2 -21 1579.82 607.311 1
 2 2 -20 3328.79 861.021 1
 -2 -2 -20 3613.71 869.25 1
 2 2 -19 2199.36 696.478 1
 -2 -2 -19 2928.53 747.372 1
 -2 -2 -18 11762.2 1405.76 1
 2 2 -18 12341.1 1502.66 1
 -2 -2 -17 12133.4 1374.62 1
 2 2 -17 11887.8 1412.86 1
 -2 -2 -16 18403.4 1616.5 1
 2 2 -16 20621.9 1770.27 1
 2 2 -15 14248.5 1400.02 1
 -2 -2 -15 13683.9 1336.21 1
 -2 -2 -14 18794.9 1500.06 1
 2 2 -14 16318.7 1455.03 1
 2 2 -13 48867 2385.7 1
 -2 -2 -13 46232.6 2230.59 1
 -2 -2 -12 7090.86 837.755 1
 2 2 -12 8124.14 946.865 1
 -2 -2 -11 11626.4 1023.98 1
 2 2 -11 13462.5 1152.5 1
 -2 -2 -10 2976.15 494.045 1
 -2 -2 -9 147977 3202.35 1
 -2 -2 -8 63478.4 1979.63 1
 -2 -2 -7 17196.8 960.825 1
 -2 -2 -6 52959.7 1592.95 1
 -2 -2 -5 240608 3167.55 1
 -2 -2 -4 59028.5 1466.37 1
 2 2 -4 62996.3 1702.32 2
 -2 2 3 134147 1668.4 2
 2 2 -3 127411 2448.19 2
 -2 2 3 132380 2832.6 1
 -2 -2 -3 129490 1979.37 1
 2 2 -2 26314.5 1139.79 2
 -2 2 2 27481.8 1296.11 1
 -2 -2 -2 26640.6 854.613 1
 -2 2 1 137114 2946.7 1
 2 2 0 219284 2632.29 1
 -2 2 0 208142 3634.86 1
 2 2 1 136320 2021.43 1
 -2 2 -1 138023 3021.53 1
 2 2 2 26792.4 835.256 1
 -2 2 -2 27594.1 1367.51 1
 -2 2 -3 132865 3081.87 1
 2 2 3 134752 1801.59 1
 -2 2 -4 62578.9 2185.55 1
 2 2 4 63347.7 1267.22 1
 -2 2 -5 244405 4443.41 1
 2 2 5 241663 2633.07 1
 2 -2 -6 54883.9 1089.02 2
 -2 2 -6 56938 2205.76 1
 2 2 6 53839.5 1345.4 1
 2 -2 -7 17563.7 699.117 2
 -2 2 -7 18815.8 1314.94 1
 -2 2 -8 64032.4 2557.37 1
 -2 2 -9 156996 4103.29 1
 -2 2 -10 3383.03 692.607 1
 -2 2 -11 9981.73 1140.01 1
 -2 2 -12 8599.1 1117.2 1
 -2 2 -13 50793 2719.82 1
 -2 2 -14 16607.4 1620.86 1
 -2 2 -15 13650.4 1527.15 1
 -2 2 -16 18861.6 1858.47 1
 -2 2 -17 10477.6 1456.06 1
 2 -2 -17 11778.6 1305.18 1
 2 -2 -18 13950.7 1477.6 1
 -2 2 -18 12992.9 1682.82 1
 2 -2 -19 1356 525.819 1
 -2 2 -19 1042.95 525.055 1
 -2 2 -20 3949.97 1002.22 1
 2 -2 -20 3825.29 828.277 1
 2 -2 -21 2826.78 783.43 1
 -2 2 -21 1643.12 719.641 1
 2 -2 -22 0.87647 251.62 1
 2 3 -20 -65.7319 322.379 1
 2 3 -19 4392.05 984.692 1
 2 3 -18 5244.41 998.179 1
 -2 -3 -18 5300.8 917.619 1
 2 3 -17 2493.04 722.37 1
 -2 -3 -17 3070.18 665.677 1
 2 3 -16 6224.43 1026.24 1
 -2 -3 -16 6806.41 956.461 1
 2 3 -15 2937.26 710.328 1
 -2 -3 -15 1893.77 508.735 1
 2 3 -14 1388.12 472.243 1
 -2 -3 -14 1591.13 427.735 1
 2 3 -13 2874.62 659.57 1
 -2 -3 -13 3567.65 612.703 1
 2 3 -12 4768.89 789.934 1
 -2 -3 -12 5866.98 733.329 1
 -2 -3 -11 56666.2 2123.36 1
 2 3 -11 56120.7 2383.75 1
 -2 -3 -10 5968.54 650.706 1
 2 3 -10 6680.12 808.106 1
 -2 -3 -9 15043.1 971.192 1
 2 3 -9 16936.4 1195.08 1
 -2 -3 -8 93140.7 2238.87 1
 2 3 -8 100381 2707.45 1
 -2 -3 -7 3198.2 394.186 1
 -2 -3 -6 104755 1973.35 1
 -2 -3 -5 10137.2 553.821 1
 2 3 -4 139187 2943.48 2
 -2 3 4 131125 2295.94 2
 -2 -3 -4 132029 1704.7 1
 -2 3 3 21836.3 1230.66 1
 -2 3 3 20939.4 906.792 2
 2 3 -3 21054.7 1160.5 2
 -2 3 2 11230.4 901.24 1
 2 3 -2 13041.7 934.071 2
 2 3 -1 88897 2457.25 2
 -2 3 1 88917.8 2522.59 1
 -2 3 0 4.23611 141.276 1
 -2 3 -1 92946.6 2673.17 1
 2 3 1 89304.7 1427.75 1
 2 3 2 11763.3 419.803 1
 -2 3 -2 10929.9 942.226 1
 -2 3 -3 23254.9 1401.69 1
 -2 3 -4 140606 3474.94 1
 2 3 4 136592 1300.86 1
 -2 3 -5 11055.8 1023.21 1
 -2 3 -6 105629 3239.78 1
 -2 3 -7 2028.33 486.115 1
 2 -3 -7 2543.58 316.979 2
 2 -3 -8 91066.5 1928.95 2
 -2 3 -8 100634 3371.64 1
 -2 3 -9 14740.6 1341.69 1
 -2 3 -10 5161.48 829.746 1
 -2 3 -11 54396.1 2735 1
 -2 3 -12 4321.99 799.805 1
 -2 3 -13 2962.38 743.929 1
 -2 3 -14 1936.09 612.951 1
 -2 3 -15 2422.54 688.909 1
 -2 3 -16 6187.06 1117.25 1
 -2 3 -17 3229.71 836.016 1
 2 -3 -17 2415.45 619.655 1
 2 -3 -18 4341.74 826.933 1
 -2 3 -18 4564.62 1055.17 1
 2 -3 -19 3156.03 728.547 1
 -2 3 -19 3778.6 939.003 1
 2 -3 -20 880.025 473.092 1
 -2 3 -20 61.7183 320.713 1
 2 -3 -21 805.964 452.884 1
 2 4 -19 95.2589 406.212 1
 2 4 -18 322.412 299.02 1
 2 4 -17 2302.56 673.896 1
 2 4 -16 936.821 475.387 1
 2 4 -15 2706.24 720.197 1
 -2 -4 -14 13889.2 1178.35 1
 2 4 -14 14046.6 1415.69 1
 -2 -4 -13 18418.6 1285.12 1
 2 4 -13 17957.2 1541.72 1
 -2 -4 -12 8300.73 821.93 1
 2 4 -12 8417.59 1029.01 1
 -2 -4 -11 9390.08 814.34 1
 2 4 -11 8754.08 990.014 1
 -2 -4 -10 12618.7 884.305 1
 2 4 -10 13377.8 1147.29 1
 -2 -4 -9 11683.3 777.394 1
 2 4 -9 11564.5 1036.11 1
 -2 -4 -8 23515.8 1000.4 1
 2 4 -8 24624.5 1420.3 1
 -2 -4 -7 15171.3 713.49 1
 2 4 -7 14887.3 1047.97 1
 -2 -4 -6 17423.7 636.234 1
 2 4 -6 16986.1 1054.08 1
 2 4 -5 13860.8 1075.68 2
 2 4 -5 13215.5 870.531 1
 2 4 -4 72377.9 2436.19 2
 -2 4 4 73813.3 2381.03 1
 -2 4 4 71263.7 2036.32 2
 2 4 -4 69905.3 1841.71 1
 -2 4 3 22188.9 1125.14 2
 -2 4 3 22818.3 1351.33 1
 2 4 -3 23863.3 995.662 1
 2 4 -3 23220.4 1404.67 2
 2 4 -2 16228.2 758.749 1
 -2 4 2 14792.7 1100.88 1
 2 4 -2 15421.4 1156.96 2
 2 4 -1 1830.95 227.022 1
 2 4 -1 2486.83 469.637 2
 -2 4 1 1473.47 345.988 1
 2 4 0 11122.9 997.948 2
 -2 4 0 10897.6 973.714 1
 2 4 0 10425.5 467.464 1
 2 4 1 2084.98 200.284 1
 -2 4 -1 1127.62 378.259 1
 2 4 1 1977.06 162.418 1
 -2 4 -2 14881.4 1167.09 1
 -2 4 -3 22051.6 1457.46 1
 -2 4 -4 70442.4 2671.02 1
 -2 4 -5 12006.9 1143.53 1
 -2 4 -6 19210 1482.03 1
 -2 4 -7 15260.9 1370.82 1
 -2 4 -8 26610.2 1826.02 1
 -2 4 -9 10903.9 1200.58 1
 -2 4 -10 13621.8 1383.18 1
 -2 4 -11 11306.6 1317.22 1
 -2 4 -12 8340.64 1176.12 1
 -2 4 -13 16436.8 1689.96 1
 -2 4 -14 12247.9 1506.21 1
 -2 4 -15 2818.06 762.611 1
 -2 4 -16 1247.12 614.973 1
 -2 4 -17 2344 805.306 1
 2 -4 -17 3240.21 674.87 1
 2 -4 -18 1639.62 504.626 1
 -2 4 -18 720.106 489.251 1
 2 -4 -19 342.889 255.196 1
 -2 4 -19 353.782 364.288 1
 2 -4 -20 2824.69 723.525 1
 2 5 -19 4468.63 1014.23 1
 2 5 -18 2477.64 734.102 1
 2 5 -17 994.589 539.226 1
 2 5 -16 1739.29 592.768 1
 2 5 -15 7373.85 1109.18 1
 2 5 -14 1081.56 441.232 1
 2 5 -13 4732.11 830.803 1
 2 5 -12 4039.02 724.897 1
 2 5 -11 891.977 370.902 1
 2 5 -10 8383.93 940.632 1
 -2 -5 -9 8813.11 585.4 1
 2 5 -9 9104.64 968.925 1
 -2 -5 -8 7577.2 453.623 1
 2 5 -8 9028.84 913.106 1
 2 5 -7 13366.3 1054.45 1
 2 5 -6 10680 1096.16 2
 2 5 -6 10836.8 901.068 1
 2 5 -5 51626.3 2291.07 2
 2 5 -5 47317.9 1748.47 1
 -2 5 5 50493.7 2005.17 2
 -2 5 4 2059.97 423.049 2
 2 5 -4 1959.98 357.65 1
 2 5 -4 2060.51 494.147 2
 -2 5 4 1765.19 389.247 1
 -2 5 3 6178.54 733.088 1
 -2 5 3 6122.53 694.655 2
 2 5 -3 4888.23 723.974 2
 2 5 -3 5843.18 543.791 1
 2 5 -2 40929.9 2054.19 2
 -2 5 2 42029.7 1772.74 2
 -2 5 2 45107.5 2018.18 1
 2 5 -2 41920 1341.98 1
 2 5 -1 107331 3407.83 2
 -2 5 1 101657 3099.31 1
 2 5 -1 109934 1947.44 1
 2 5 0 11686.5 1151.52 2
 2 5 0 13052.7 609.859 1
 -2 5 0 14730.5 1209.19 1
 -2 5 -1 107553 3353.36 1
 2 5 1 106033 1365.23 1
 2 5 1 106022 1372.82 1
 -2 5 -2 41479.3 2093.55 1
 -2 5 -3 4585.48 740.603 1
 -2 5 -4 1945.46 482.387 1
 -2 5 -5 48742.7 2413 1
 -2 5 -6 12723.5 1286.82 1
 -2 5 -7 11461.9 1231.8 1
 -2 5 -8 8266.36 1107.18 1
 -2 5 -9 10193.2 1216.69 1
 -2 5 -10 8577.41 1154.21 1
 -2 5 -11 905.578 396.78 1
 -2 5 -12 3127.76 770.959 1
 -2 5 -13 4771.09 995.847 1
 -2 5 -14 1992.68 697.776 1
 -2 5 -15 9537.72 1409.25 1
 -2 5 -16 1346.17 641.924 1
 -2 5 -17 544.464 433.051 1
 2 -5 -17 454.944 300.014 1
 -2 5 -18 2161.03 790.417 1
 2 6 -18 605.074 423.669 1
 2 6 -17 2858.95 791.954 1
 2 6 -16 707.399 403.667 1
 2 6 -15 2120.6 668.542 1
 2 6 -14 7917.61 1143.48 1
 2 6 -13 742.765 379.016 1
 2 6 -12 7703.4 1057.72 1
 2 6 -11 7938.94 1008.43 1
 2 6 -10 2333.61 536.431 1
 2 6 -9 3172.28 591.54 1
 2 6 -8 12176.4 1117.37 1
 2 6 -7 918.823 325.265 1
 2 6 -7 781.81 316.109 2
 2 6 -6 52769 2570.19 2
 2 6 -6 50969.4 2069.53 1
 -2 6 5 10021.8 1011.66 2
 2 6 -5 10685.6 1163.18 2
 2 6 -5 11602.1 934.383 1
 -2 6 4 16888 1291.84 2
 2 6 -4 16788.7 1460.66 2
 -2 6 4 15736.3 1217.25 1
 2 6 -4 16651 1067.77 1
 2 6 -3 31212.3 1979.64 2
 -2 6 3 30895.5 1732.8 2
 -2 6 3 31614.4 1750.1 1
 2 6 -3 30793.4 1376.09 1
 2 6 -2 29378.1 1930.39 2
 -2 6 2 27239.1 1668.79 1
 -2 6 2 27185 1613.66 2
 2 6 -2 27414.9 1214.63 1
 2 6 -1 6596.31 951.674 2
 -2 6 1 5416 768.843 1
 2 6 -1 7175.09 572.59 1
 -2 6 1 5230.72 734.829 2
 2 6 0 93.2258 350.957 2
 2 6 0 300.841 120.322 1
 -2 6 0 -178.063 250.711 1
 2 6 1 5924.72 342.885 1
 -2 6 -1 6169.96 854.882 1
 -2 6 -2 27733.3 1829.12 1
 -2 6 -3 30726.7 1964.66 1
 -2 6 -4 16213.7 1470.18 1
 -2 6 -5 9461.11 1162.26 1
 -2 6 -6 53699.4 2747.96 1
 -2 6 -7 1190.83 505.816 1
 -2 6 -8 11079.9 1323.93 1
 -2 6 -9 5002.05 920.846 1
 -2 6 -10 2186.56 643.541 1
 -2 6 -11 6398.06 1079.89 1
 -2 6 -12 7719.07 1211.57 1
 -2 6 -13 1383.38 567.629 1
 -2 6 -14 7279.62 1245.63 1
 -2 6 -15 2202.49 730.407 1
 -2 6 -16 720.956 503.164 1
 -2 6 -17 2245.87 792.474 1
 -2 6 -18 619.459 484.121 1
 2 7 -17 1737.18 730.563 1
 2 7 -16 2280.11 716.606 1
 2 7 -15 2060.53 673.004 1
 2 7 -14 1729.48 614.922 1
 2 7 -13 560.375 408.069 1
 2 7 -12 591.622 256.721 1
 2 7 -11 1191.44 460.967 1
 2 7 -10 7734.25 1022.91 1
 2 7 -9 2412.16 559.531 1
 2 7 -9 1836.89 585.623 2
 2 7 -8 1199.7 468.083 2
 2 7 -8 822.326 331.882 1
 2 7 -7 18988.5 1689.23 2
 2 7 -7 20128.2 1473.69 1
 2 7 -6 9651.5 1222.49 2
 2 7 -6 9530.75 973.038 1
 -2 7 5 22.1882 191.734 2
 2 7 -5 296.841 390.37 2
 2 7 -5 660.233 297.376 1
 -2 7 4 10378.2 1145.49 2
 2 7 -4 8570.5 1144.91 2
 -2 7 4 9897.66 992.299 1
 2 7 -4 8400.74 838.279 1
 2 7 -3 12690.9 1387.42 2
 -2 7 3 13678.5 1198.87 1
 -2 7 3 13141.6 1276.78 2
 2 7 -3 14460.8 1042.84 1
 2 7 -2 4772.78 841.241 2
 2 7 -2 3963.8 521.718 1
 -2 7 2 5341.03 777.682 1
 -2 7 2 5414.59 824.984 2
 -2 7 1 3246.68 633.917 1
 2 7 -1 4100.69 801.805 2
 -2 7 1 3358.1 629.671 2
 2 7 -1 4798.45 515.69 1
 2 7 0 3721.64 789.944 2
 -2 7 0 2541.2 574.67 1
 -2 7 0 2225.32 543.794 2
 -2 7 -1 4641.51 797.229 1
 -2 7 -2 3126.6 664.317 1
 -2 7 -3 13176.7 1351.98 1
 -2 7 -4 9804.09 1210.37 1
 -2 7 -5 79.5028 195.952 1
 -2 7 -6 9890.6 1268.52 1
 -2 7 -7 19397 1814 1
 -2 7 -8 674.71 405.903 1
 -2 7 -9 2779.37 743.821 1
 -2 7 -10 7678.37 1222.67 1
 -2 7 -11 2105.71 686.451 1
 -2 7 -12 1532.87 642.135 1
 -2 7 -13 912.218 474.365 1
 -2 7 -14 512.213 453.314 1
 -2 7 -15 1317.14 598.456 1
 -2 7 -16 1768.94 723.799 1
 -2 7 -17 1988.05 786.966 1
 2 8 -16 1772.06 655.915 1
 2 8 -15 1896.67 668.222 1
 2 8 -14 3058.31 809.322 1
 2 8 -13 1883.09 628.225 1
 2 8 -13 2581.13 785.793 2
 2 8 -12 7351.37 1140.24 1
 2 8 -12 8796.35 1379.32 2
 2 8 -11 802.273 396.891 1
 2 8 -11 1764.61 621.166 2
 2 8 -10 633.931 430.186 2
 2 8 -10 473.14 298.819 1
 2 8 -9 6000.14 1075.8 2
 2 8 -9 5647.28 911.935 1
 2 8 -8 772.651 410.463 2
 2 8 -8 1911.56 507.005 1
 2 8 -7 3087.19 772.688 2
 2 8 -7 2778.6 611.745 1
 2 8 -6 5700.16 1027.98 2
 2 8 -6 4208.58 700.962 1
 -2 8 5 9197.76 1187.52 2
 2 8 -5 9677.92 1299.47 2
 2 8 -5 10776.6 1072.34 1
 -2 8 4 29961 2096.23 2
 2 8 -4 30702.8 2304.11 2
 -2 8 3 7823.97 1083.89 2
 -2 8 3 8386.4 984.774 1
 2 8 -3 9485.61 1353.93 2
 -2 8 2 6823.83 1014.47 2
 -2 8 2 6107.86 884.547 1
 2 8 -2 5584.14 1017.89 2
 -2 8 1 18125.5 1543.84 1
 -2 8 1 18533.6 1633.61 2
 2 8 -1 17811.5 1781.86 2
 2 8 0 27335.8 2215.29 2
 -2 8 0 28379.8 2012.35 2
 -2 8 0 26549.9 1904.25 1
 -2 8 -1 20263 1722.48 1
 -2 8 -1 19167.2 1678.74 2
 -2 8 -2 3223.12 700.309 1
 -2 8 -3 7500.69 1116.76 1
 -2 8 -4 31253.6 2275.42 1
 -2 8 -5 9415.03 1286.42 1
 -2 8 -6 3485.45 802.247 1
 -2 8 -7 1925.04 629.64 1
 -2 8 -8 1229.3 521.563 1
 -2 8 -9 6478.07 1149.15 1
 -2 8 -10 907.672 507.151 1
 -2 8 -11 238.176 425.945 1
 -2 8 -12 5828.43 1186 1
 -2 8 -13 1531.9 707.741 1
 -2 8 -14 3535.77 987.48 1
 -2 8 -15 2455.55 877.865 1
 2 9 -15 1771.1 716.522 1
 2 9 -14 2407.54 823.475 2
 2 9 -14 1597.62 646.809 1
 2 9 -13 1790.16 747.631 2
 2 9 -13 1846.51 663.251 1
 2 9 -12 2724.58 833.976 2
 2 9 -12 899.802 462.502 1
 2 9 -11 2413.43 806.638 2
 2 9 -11 2763.74 732.754 1
 2 9 -10 2371.03 784.457 2
 2 9 -9 1829.33 691.662 2
 2 9 -8 2894.33 807.486 2
 2 9 -7 1937.86 597.644 2
 2 9 -6 184.404 374.24 2
 2 9 -5 1835.95 649.924 2
 -2 9 4 2539.99 706.547 2
 2 9 -4 2754.77 776.759 2
 -2 9 3 3536.63 792.192 2
 2 9 -3 4524.48 988.088 2
 -2 9 2 625.889 444.304 2
 2 9 -2 493.982 404.723 2
 2 9 -1 8224.13 1312.7 2
 -2 9 1 8959.27 1236.17 2
 2 9 0 6129.78 1175.07 2
 -2 9 0 5631.25 991.817 2
 -2 9 -1 7755.7 1156.26 2
 -2 9 -1 9881.99 1234.76 1
 -2 9 -2 38.961 210.472 1
 -2 9 -2 264.281 262.418 2
 -2 9 -3 4955.1 954.334 2
 -2 9 -3 3493.58 780.947 1
 -2 9 -4 2487.34 662.897 1
 -2 9 -5 368.724 276.504 1
 -2 9 -6 267.448 303.719 1
 -2 9 -7 1842.66 618.965 1
 -2 9 -8 2543.63 777.663 1
 -2 9 -9 1134.42 541.691 1
 -2 9 -10 3084.12 861.637 1
 -2 9 -11 1254.49 628.754 1
 -2 9 -12 1905.31 757.029 1
 -2 9 -13 2792.7 889.809 1
 -2 9 -14 2329.28 934.017 1
 2 10 -11 3714.2 1033.23 2
 2 10 -10 193.497 354.919 2
 2 10 -9 150.679 467.709 2
 2 10 -8 3687.04 977.967 2
 2 10 -7 544.901 397.77 2
 2 10 -6 1071.05 558.222 2
 2 10 -5 3997.31 972.15 2
 2 10 -4 271.532 445.141 2
 -2 10 4 433.299 332.703 2
 2 10 -3 3801.11 959.435 2
 -2 10 3 5205.5 1025.63 2
 2 10 -2 -246.896 366.073 2
 -2 10 2 -372.589 414.149 2
 2 10 -1 1334.17 563.504 2
 -2 10 1 2568.24 714.562 2
 -2 10 0 369.391 436.398 2
 -2 10 -1 1778.47 662.013 2
 -2 10 -2 131.093 389.115 2
 -2 10 -3 5259.12 1047.6 2
 -2 10 -4 1373.19 634.622 2
 -2 10 -5 3127.07 917.954 2
 -2 10 -7 704.705 461.775 1
 -2 10 -8 1360.57 609.038 1
 -2 10 -9 -53.7099 257.39 1
 -2 10 -10 -88.8556 258.92 1
 -2 10 -11 1961.51 756.712 1
 -2 10 -12 1230.96 626.088 1
 -2 10 -13 2263.36 881.372 1
 2 11 -6 1383.56 651.216 2
 2 11 -5 2289.69 803.256 2
 2 11 -4 478.452 470.192 2
 -2 11 3 954.61 581.048 2
 2 11 -3 -421.83 452.599 2
 2 11 -2 -26.2496 245.329 2
 -2 11 2 168.124 306.813 2
 -2 11 1 -199.248 347.835 2
 -2 11 0 2077.86 688.108 2
 -2 11 -1 1120.14 568.325 2
 -2 11 -2 1623.86 658.044 2
 -2 11 -3 184.443 378.153 2
 -2 11 -4 1098.95 609.175 2
 -2 11 -5 1717.4 715.811 2
 -2 11 -6 130.89 273.726 2
 -2 12 2 940.041 572.65 2
 -2 12 1 3503.74 1045.61 2
 -3 0 0 214.69 170.382 1
 -3 0 1 2136.82 386.454 1
 -3 0 -1 1185.22 307.563 1
 -3 0 2 30344.7 1428.71 1
 -3 0 -2 30035.5 1465.49 1
 -3 0 3 116882 1603.63 2
 -3 0 -3 118896 2935.63 1
 -3 0 -4 237938 4240.41 1
 -3 0 -5 10298.2 931.697 1
 -3 0 -6 32082.3 1678.71 1
 3 0 -7 35867.8 826.216 2
 -3 0 -7 41446.9 1936.99 1
 -3 0 -8 37099.1 1898.57 1
 -3 0 -9 31131.8 1814.72 1
 -3 0 -10 433.454 274.631 1
 -3 0 -11 184.851 248.403 1
 -3 0 -12 2721.14 663.067 1
 -3 0 -13 11916.3 1309.08 1
 -3 0 -14 611.929 543.976 1
 -3 0 -15 3083.86 798.96 1
 -3 0 -16 19158.6 1855.69 1
 3 0 -17 1611.15 593.767 1
 -3 0 -17 -612.406 336.212 1
 -3 0 -18 4263.15 961.481 1
 3 0 -18 4752.26 923.936 1
 -3 0 -19 1002.55 514.277 1
 3 0 -19 263.457 295.876 1
 3 0 -20 7580.5 1235.65 1
 -3 0 -20 6811.59 1265.52 1
 -3 0 -21 1466.08 632.909 1
 -3 0 -22 12.2582 275.101 1
 -3 -1 -21 1189.06 583.625 1
 -3 -1 -20 55.7389 267.685 1
 3 1 -20 895.105 545.504 1
 3 1 -19 6423.78 1111.36 1
 -3 -1 -19 4630.05 982.751 1
 -3 -1 -18 2118.29 671.423 1
 3 1 -18 3285.91 731.186 1
 3 1 -17 5798.3 990.283 1
 -3 -1 -17 4334.28 920.074 1
 -3 -1 -16 9569.42 1270.93 1
 3 1 -16 10035.9 1244.45 1
 -3 -1 -15 21012.7 1809.7 1
 -3 -1 -14 3514.99 736.921 1
 -3 -1 -13 6337.26 923.646 1
 -3 -1 -12 2516.97 560.833 1
 -3 -1 -11 5303.83 778.045 1
 -3 -1 -10 706.755 299.907 1
 -3 -1 -9 6339.56 791.729 1
 -3 -1 -8 35495.3 1776.87 1
 3 1 -7 76376.5 1682.08 2
 -3 -1 -7 76636.4 2492.79 1
 3 1 -6 72847.4 1625.02 2
 -3 -1 -6 69231.8 2312.66 1
 3 1 -5 95189 1869.12 2
 -3 -1 -5 93883.3 2580.12 1
 -3 -1 -4 71870.9 2174.42 1
 -3 1 3 51811.4 1960.29 1
 -3 -1 -3 44972.4 1685.3 1
 -3 1 2 140208 3219.08 1
 -3 -1 -2 141372 2886.57 1
 -3 1 1 35879.9 1650.97 1
 -3 -1 -1 36093.7 1443.46 1
 -3 -1 0 48412.7 1638.27 1
 -3 1 0 47186.1 1901.46 1
 -3 1 -1 40001.3 1755.69 1
 -3 -1 1 39332.2 1502.17 1
 -3 -1 2 142843 2376.08 2
 -3 1 -2 137729 3352.52 1
 -3 -1 3 43711.8 1223.76 2
 -3 1 -3 41918.7 1872.38 1
 -3 1 -4 75873.1 2555.8 1
 -3 1 -5 95730.2 2980.35 1
 -3 1 -6 69903.2 2606.71 1
 -3 1 -7 78769.1 2840.28 1
 -3 1 -8 34516 1948.1 1
 -3 1 -9 9000.89 1038.06 1
 -3 1 -10 638.721 364.586 1
 -3 1 -11 5866.88 900.77 1
 -3 1 -12 1960.61 518.744 1
 -3 1 -13 5994.24 959.432 1
 -3 1 -14 4417.08 869.283 1
 -3 1 -15 21084.8 1928.71 1
 -3 1 -16 12175.7 1527.07 1
 -3 1 -17 5252.58 1040.33 1
 3 -1 -18 2803.43 717.361 1
 -3 1 -18 3058.65 828.48 1
 3 -1 -19 6359.06 1069.07 1
 -3 1 -19 4920.97 1081 1
 -3 1 -20 -374.968 414.789 1
 3 -1 -20 -53.5142 255.947 1
 3 -1 -21 2856.68 795.235 1
 -3 1 -21 894.088 503.853 1
 3 2 -20 978.108 477.951 1
 -3 -2 -19 5763.43 1058.98 1
 3 2 -19 7312.58 1208.65 1
 3 2 -18 7911.79 1216.23 1
 -3 -2 -18 5673.33 1006.09 1
 3 2 -17 1079.08 494.045 1
 -3 -2 -17 247.341 262.825 1
 3 2 -16 3761.73 793.621 1
 -3 -2 -16 2953.04 699.415 1
 3 2 -15 5186.99 881.708 1
 -3 -2 -15 4540.87 809.217 1
 -3 -2 -14 28445.6 1941.01 1
 3 2 -14 34285.9 2126.02 1
 -3 -2 -13 10096.8 1119.02 1
 -3 -2 -12 5454.05 791.358 1
 -3 -2 -11 2522.55 530.623 1
 -3 -2 -10 32877.8 1758.46 1
 -3 -2 -9 228.893 199.011 1
 -3 -2 -8 11851.7 965.203 1
 3 2 -7 46838.2 1637.97 2
 -3 -2 -7 50117.9 1902.63 1
 -3 -2 -6 27419.9 1349.86 1
 3 2 -6 26071.3 1202.7 2
 3 2 -5 45152.9 1589.43 2
 -3 -2 -5 45854.4 1674.94 1
 -3 2 4 13224 447.613 2
 -3 -2 -4 13167.7 864.543 1
 3 2 -4 13544.6 860.118 2
 -3 -2 -3 34598.9 1335.58 1
 -3 2 3 35486.4 1707.24 1
 -3 2 2 6115.16 740.12 1
 -3 -2 -2 5691.05 527.261 1
 -3 -2 -1 53668.1 1582.06 1
 -3 2 1 55919 2184.17 1
 3 2 0 291347 4096.2 1
 -3 2 0 302602 5080.45 1
 3 2 1 53081.3 1685.86 1
 -3 2 -1 52473.5 2169.54 1
 3 2 2 6013.82 549.164 1
 -3 2 -2 5960.12 753.775 1
 -3 2 -3 35686.4 1836.95 1
 3 2 3 34292.3 1285.79 1
 -3 2 -4 12492.2 1116.06 1
 3 2 4 12222.9 770.159 1
 -3 2 -5 45020.6 2172.83 1
 -3 2 -6 27600.8 1738.88 1
 -3 2 -7 49156.8 2402.54 1
 -3 2 -8 14203.1 1341.6 1
 -3 2 -9 -62.3495 302.737 1
 -3 2 -10 33712.3 2138.72 1
 -3 2 -11 1999.53 583.19 1
 -3 2 -12 5265.26 896.703 1
 -3 2 -13 11380.9 1392.87 1
 -3 2 -14 27746.7 2200.62 1
 -3 2 -15 4368.45 935.982 1
 -3 2 -16 3829.48 866.451 1
 -3 2 -17 -40.6147 456.394 1
 -3 2 -18 7452.52 1304.85 1
 3 -2 -19 7623.38 1159.65 1
 -3 2 -19 7082.67 1322.01 1
 3 -2 -20 2509.64 695.368 1
 -3 2 -20 1109.07 556.549 1
 3 -2 -21 1244.66 602.86 1
 3 3 -19 1374.39 596.364 1
 3 3 -18 6767.44 1164.93 1
 3 3 -17 2022.03 618.732 1
 3 3 -16 8552.93 1199.54 1
 -3 -3 -16 7552.37 1044.09 1
 -3 -3 -15 12541.8 1293.11 1
 3 3 -15 11081.6 1280.25 1
 3 3 -14 907.171 372.238 1
 -3 -3 -14 906.796 377.066 1
 -3 -3 -13 26103.4 1710.1 1
 3 3 -13 27811.7 1877 1
 -3 -3 -12 10075.7 1017.64 1
 3 3 -12 10888.4 1146.24 1
 -3 -3 -11 29377 1659.23 1
 -3 -3 -10 6284.03 735.989 1
 -3 -3 -9 60769.8 2137.03 1
 -3 -3 -8 9687.25 815.632 1
 3 3 -8 8984.34 829.582 2
 3 3 -7 18985.7 1184.36 2
 -3 -3 -7 18250.7 1066.76 1
 3 3 -6 59824.3 2094.06 2
 -3 -3 -6 62637.1 1822.82 1
 3 3 -5 30389.7 1487.1 2
 -3 -3 -5 30880.9 1230.15 1
 -3 3 4 1199.07 205.752 2
 3 3 -4 990.254 275.157 2
 -3 -3 -4 1204.6 235.278 1
 -3 3 4 1492.42 373.711 1
 3 3 -3 19920.1 1242.51 2
 -3 -3 -3 19443.7 842.418 1
 -3 3 3 18203.7 1304.66 1
 -3 3 2 14033.2 1163.45 1
 -3 3 1 115719 3293.98 1
 3 3 0 22241.2 1091.2 1
 -3 3 0 29100.8 1703.56 1
 3 3 1 112360 2323.68 1
 -3 3 -1 121694 3501.86 1
 -3 3 -2 14732.8 1250.94 1
 3 3 2 13487.4 740.422 1
 -3 3 -3 21030.5 1515.32 1
 3 3 3 19722.6 837.675 1
 -3 3 -4 1527 473.006 1
 3 3 4 1542.68 226.963 1
 -3 3 -5 28529.1 1836.41 1
 3 3 5 33171.8 1030.62 1
 -3 3 -6 58396.9 2694.9 1
 3 3 6 56938.6 1414.28 1
 -3 3 -7 18617.7 1580.27 1
 -3 3 -8 11018.9 1241.39 1
 -3 3 -9 61681 2957.69 1
 -3 3 -10 8262.82 1152.61 1
 -3 3 -11 29769.4 2165.99 1
 -3 3 -12 10766.4 1365.34 1
 -3 3 -13 29099.4 2258.41 1
 -3 3 -14 933.471 492.067 1
 -3 3 -15 13338.6 1638.7 1
 -3 3 -16 8970.63 1400.28 1
 -3 3 -17 2134.93 729.662 1
 -3 3 -18 5369.73 1145.56 1
 3 -3 -19 1356.04 544.678 1
 -3 3 -19 2106.32 763.397 1
 3 -3 -20 6474.82 1097.84 1
 -3 3 -20 5969.46 1294.23 1
 3 -3 -21 2991.54 780.074 1
 3 4 -19 1935.29 682.393 1
 3 4 -18 2272.82 747.855 1
 3 4 -17 2694.05 725.207 1
 3 4 -16 1783.6 589.99 1
 3 4 -15 6303.25 1031.24 1
 3 4 -14 5218.79 893.864 1
 3 4 -13 7670.55 1014.02 1
 -3 -4 -12 35918 1806.78 1
 3 4 -12 34744.3 2063.24 1
 -3 -4 -11 14361.9 1078.71 1
 3 4 -11 13915 1264.15 1
 -3 -4 -10 21783.7 1264.57 1
 3 4 -10 23855.3 1555.34 1
 3 4 -9 14886.1 1234.97 2
 -3 -4 -9 14750.7 965.921 1
 3 4 -9 14352.7 1154.16 1
 3 4 -8 8787.23 914.42 2
 -3 -4 -8 8094.67 670.861 1
 3 4 -7 7023.51 823.705 2
 -3 -4 -7 7945.49 597.983 1
 3 4 -6 5018.03 689.559 2
 -3 -4 -6 4221.16 384.433 1
 3 4 -5 13514.3 1110.86 2
 -3 4 5 12371.2 790.783 2
 -3 -4 -5 12812.1 563.812 1
 -3 4 4 3573 597.717 1
 -3 4 4 3704.61 433.701 2
 3 4 -4 4214.05 625.142 2
 3 4 -3 11809 1055.11 2
 -3 4 3 12131.3 1109.98 1
 3 4 -2 14193.7 1178.73 2
 -3 4 2 13100.2 1177.3 1
 -3 4 1 3019.57 587.835 1
 3 4 0 19025 923.395 1
 -3 4 0 17228.6 1371.33 1
 3 4 1 3087.08 349.307 1
 -3 4 -1 3275.66 629.303 1
 -3 4 -2 14041.7 1289.01 1
 3 4 2 13507.5 642.439 1
 -3 4 -3 11958.3 1180.66 1
 3 4 3 10322.2 451.074 1
 3 4 4 4098.24 245.03 1
 -3 4 -4 3678.54 676.42 1
 -3 4 -5 12245.9 1265.31 1
 3 4 5 11802.3 423.852 1
 -3 4 -6 3641.69 719.869 1
 -3 4 -7 8982 1155.7 1
 -3 4 -8 8606.15 1143.8 1
 -3 4 -9 15271.9 1551.98 1
 -3 4 -10 21633.4 1896.22 1
 -3 4 -11 15483.9 1643.64 1
 -3 4 -12 37347.5 2613.47 1
 -3 4 -13 8013.63 1274.78 1
 -3 4 -14 4303.76 937.476 1
 -3 4 -15 3966.17 955.276 1
 -3 4 -16 1812.4 677.126 1
 -3 4 -17 2785.68 910.509 1
 -3 4 -18 1712.47 755.628 1
 -3 4 -19 1315.24 613.819 1
 3 -4 -19 1408.56 502.399 1
 3 -4 -20 3737.41 812.141 1
 3 5 -18 2345.86 738.648 1
 3 5 -17 1938.72 685.218 1
 3 5 -16 925.551 495.509 1
 3 5 -15 3380.45 804.487 1
 3 5 -14 1942.09 618.597 1
 3 5 -13 918.645 399.176 1
 3 5 -12 5687.56 878.379 1
 3 5 -11 1249.46 430.114 1
 3 5 -10 27065.4 1845.63 2
 3 5 -10 28044.8 1739.38 1
 3 5 -9 5569.12 759.272 1
 3 5 -9 5141.09 811.975 2
 3 5 -8 19381.1 1502.61 2
 3 5 -8 21021.7 1365.08 1
 3 5 -7 7009.61 901.444 2
 3 5 -7 6917.92 753.818 1
 3 5 -6 64021.5 2688.02 2
 3 5 -6 60494.9 2099.93 1
 3 5 -5 50322.5 2373.15 2
 -3 5 5 45019.8 1790.3 2
 -3 5 5 51783.8 2353.15 1
 3 5 -5 45818.4 1716.6 1
 3 5 -4 13832.6 1250.97 2
 -3 5 4 11465.9 912.013 2
 -3 5 4 11572.5 1129.01 1
 3 5 -4 10978.1 793.197 1
 -3 5 3 4451.24 710.178 1
 3 5 -3 5141.84 519.804 1
 3 5 -3 4390.84 711.679 2
 -3 5 3 4713.64 579.695 2
 -3 5 2 8377.05 997.698 1
 3 5 -2 7728.31 575.734 1
 -3 5 1 5712.38 838.813 1
 3 5 -1 5558.86 445.635 1
 3 5 0 138.268 91.7717 1
 3 5 0 85.9521 60.4594 1
 -3 5 0 142.812 244.225 1
 3 5 1 4920.3 401.385 1
 -3 5 -1 5244.91 812.073 1
 3 5 1 6015.81 338.123 1
 -3 5 -2 8221.11 1034.93 1
 -3 5 -3 4245.43 753.635 1
 -3 5 -4 12916.2 1332.84 1
 -3 5 -5 45674.3 2570.9 1
 -3 5 -6 62029.4 3047.07 1
 -3 5 -7 7012.28 1089.15 1
 -3 5 -8 21378.4 1885.17 1
 -3 5 -9 5399.05 1033.99 1
 -3 5 -10 24934.5 2111.49 1
 -3 5 -11 -500.034 549.028 1
 -3 5 -12 5777.67 1122.52 1
 -3 5 -13 366.619 294.654 1
 -3 5 -14 1471.37 694.992 1
 -3 5 -15 2873.4 854.093 1
 -3 5 -16 161.587 548.762 1
 -3 5 -17 919.404 571.365 1
 -3 5 -18 1525.21 694.137 1
 3 6 -17 -71.3742 250.612 1
 3 6 -16 2352.33 719.387 1
 3 6 -15 235.346 362.584 1
 3 6 -14 1070.87 462.183 1
 3 6 -13 2911.89 733.735 2
 3 6 -13 1570.06 509.98 1
 3 6 -12 3041.27 667.092 1
 3 6 -12 2192.4 646.034 2
 3 6 -11 2238.22 582.95 1
 3 6 -11 1817.32 551.97 2
 3 6 -10 108.148 212.412 1
 3 6 -10 -90.4869 268.847 2
 3 6 -9 2638.82 576.279 1
 3 6 -9 3627.77 734.841 2
 3 6 -8 15508.6 1491.86 2
 3 6 -8 13008.7 1145.57 1
 3 6 -7 19248.2 1638.63 2
 3 6 -7 21979.7 1414.57 1
 3 6 -6 21995.8 1735.85 2
 3 6 -6 20654.4 1319.3 1
 -3 6 5 9096.35 1026.87 1
 -3 6 5 8148.08 875.211 2
 3 6 -5 6594.25 956.744 2
 3 6 -5 7292.39 743.234 1
 3 6 -4 24803.5 1829.81 2
 -3 6 4 23124.3 1656.59 1
 -3 6 4 25386.7 1548.43 2
 3 6 -4 25604.1 1304.37 1
 3 6 -3 29831.2 2050.82 2
 -3 6 3 27942.8 1599.88 2
 -3 6 3 31233.4 1963.3 1
 3 6 -3 28472.9 1279.67 1
 3 6 -2 44085.2 2478.6 2
 -3 6 2 44295.6 2019.71 2
 -3 6 2 44598.2 2383.46 1
 3 6 -2 45724.6 1500.87 1
 -3 6 1 3858.61 711.235 1
 3 6 -1 5628.14 476.668 1
 -3 6 0 29148.7 1971.88 1
 3 6 0 30194.4 964.883 1
 -3 6 -1 4021.12 788.26 1
 3 6 1 4460.3 287.117 1
 -3 6 -2 44255.8 2525.39 1
 -3 6 -3 29876.1 2100.26 1
 -3 6 -4 23950.4 1910.39 1
 -3 6 -5 7094.31 1077.16 1
 -3 6 -6 19320.4 1805.52 1
 -3 6 -7 19524.8 1832.48 1
 -3 6 -8 12374.2 1515.54 1
 -3 6 -9 2610.62 755.423 1
 -3 6 -10 562.776 426.899 1
 -3 6 -11 1180.87 512.843 1
 -3 6 -12 2812.66 866.656 1
 -3 6 -13 2102.75 718.127 1
 -3 6 -14 2348.78 832.998 1
 -3 6 -15 221.339 286.476 1
 -3 6 -16 1086.63 576.788 1
 -3 6 -17 356.477 385.423 1
 3 7 -17 3420.92 878.342 1
 3 7 -16 3821.41 904.415 1
 3 7 -16 5982.22 1172.34 2
 3 7 -15 105.869 322.191 1
 3 7 -15 731.126 426.479 2
 3 7 -14 3574.73 889.208 2
 3 7 -14 2765.67 724.201 1
 3 7 -13 2148.08 679.353 2
 3 7 -13 2384.32 661.515 1
 3 7 -12 9760.82 1355.04 2
 3 7 -12 10274.4 1262.54 1
 3 7 -11 5412.29 1011.77 2
 3 7 -11 6530.72 979.251 1
 3 7 -10 3999.59 843.477 2
 3 7 -10 4295.8 761.938 1
 3 7 -9 3338.6 774.736 2
 3 7 -9 2188.5 529.357 1
 3 7 -8 13710.6 1499.62 2
 3 7 -8 12443.6 1183.39 1
 3 7 -7 1710.6 592.686 2
 3 7 -7 2212.58 495.537 1
 3 7 -6 428.545 343.062 2
 3 7 -6 151.807 158.316 1
 -3 7 5 10709.4 1123.94 2
 -3 7 5 11173.4 1184.24 1
 3 7 -5 9636.64 907.919 1
 3 7 -5 10291.3 1283.38 2
 -3 7 4 10958 1137.9 2
 -3 7 4 12808.2 1276.18 1
 3 7 -4 12013.8 951.224 1
 3 7 -4 14437.6 1528.52 2
 3 7 -3 1187.19 297.24 1
 3 7 -3 486.141 293.757 2
 -3 7 3 623.879 328.415 2
 -3 7 3 299.192 263.689 1
 -3 7 2 5133.01 785.116 2
 3 7 -2 5966.63 1017.24 2
 -3 7 2 5338.71 874.971 1
 -3 7 1 13651.7 1266 2
 -3 7 1 14776.1 1443.65 1
 -3 7 0 1727.79 516.7 1
 -3 7 -1 11634.5 1348.61 1
 -3 7 -2 5748.6 988.702 1
 -3 7 -3 1051.75 470.972 1
 -3 7 -4 12061.6 1413.42 1
 -3 7 -5 10673.1 1366.55 1
 -3 7 -6 630.075 367.328 1
 -3 7 -7 2140.09 677.755 1
 -3 7 -8 13566.2 1656.48 1
 -3 7 -9 841.453 437.122 1
 -3 7 -10 4747.81 1025.41 1
 -3 7 -11 6716.97 1237.62 1
 -3 7 -12 7494.65 1347.79 1
 -3 7 -13 2966.26 896.533 1
 -3 7 -14 4028.02 1060.54 1
 -3 7 -15 552.271 463.026 1
 -3 7 -16 3997.33 1058.15 1
 3 8 -16 3573.38 909.063 1
 3 8 -16 2894.18 883.584 2
 3 8 -15 531.779 366.822 1
 3 8 -15 1208.25 591.409 2
 3 8 -14 3687.51 861.68 1
 3 8 -14 2523.25 797.261 2
 3 8 -13 1787.64 583.74 1
 3 8 -13 1627.03 638.978 2
 3 8 -12 2548.51 704.125 1
 3 8 -12 3454.67 877.923 2
 3 8 -11 1467.5 546.547 1
 3 8 -11 1620.78 626.764 2
 3 8 -10 2985.05 817.635 2
 3 8 -10 4467.69 810.869 1
 3 8 -9 1834 538.601 1
 3 8 -9 1048.85 568.54 2
 3 8 -8 12280.4 1576.32 2
 3 8 -8 10848.9 1166.56 1
 3 8 -7 3642.58 663.923 1
 3 8 -7 1698.17 688.876 2
 3 8 -6 2466.27 803.782 2
 -3 8 5 6907.18 992.716 2
 3 8 -5 6172.84 1095.79 2
 -3 8 5 8258.51 1043.63 1
 -3 8 4 7682.32 1028.48 1
 3 8 -4 7365.57 1212.07 2
 -3 8 4 7328.9 1025.78 2
 -3 8 3 1370.97 512.586 2
 3 8 -3 1483.65 503.55 2
 -3 8 3 1779.4 520.969 1
 3 8 -2 15389.8 1687.37 2
 -3 8 2 14177.1 1409.37 2
 -3 8 2 14263 1455.83 1
 -3 8 1 10177.2 1187.89 2
 -3 8 1 12188.6 1375.9 1
 -3 8 0 9259.15 1161.61 2
 -3 8 0 8406.95 1182.67 1
 -3 8 -1 10970 1363.03 1
 -3 8 -2 12710.1 1504.37 1
 -3 8 -3 1997.24 680.64 1
 -3 8 -4 6336.7 1113.2 1
 -3 8 -5 7882.89 1252.08 1
 -3 8 -6 2354.12 740.791 1
 -3 8 -7 2685.43 834.253 1
 -3 8 -8 9394.29 1444.09 1
 -3 8 -9 902.111 484.942 1
 -3 8 -10 2634.9 805.469 1
 -3 8 -11 1227 629.2 1
 -3 8 -12 990.719 514.917 1
 -3 8 -13 2673.21 872.13 1
 -3 8 -14 1868.86 793.741 1
 -3 8 -15 249.375 342.532 1
 3 9 -14 1206.61 663.145 2
 3 9 -13 3048.28 918.457 2
 3 9 -12 2299.17 798.27 2
 3 9 -11 1835.52 747.484 2
 3 9 -10 3351.14 900.209 2
 3 9 -9 1584.08 638.223 2
 3 9 -8 5164.94 1109.58 2
 3 9 -7 -70.3503 254.67 2
 3 9 -6 4115.12 967.922 2
 -3 9 5 1843.87 594.319 2
 3 9 -5 5395.49 1075.92 2
 3 9 -4 2649.18 739.649 2
 -3 9 4 1664.53 527.59 2
 3 9 -3 6540.83 1190.38 2
 -3 9 3 5981.33 1000.61 2
 3 9 -2 1368.48 674.382 2
 -3 9 2 1172.04 463.61 2
 -3 9 1 2069.87 589.324 2
 -3 9 0 778.964 405.094 1
 -3 9 0 1652.33 568.738 2
 -3 9 -1 2251.6 598.374 2
 -3 9 -1 2054.79 637.322 1
 -3 9 -2 1610.06 567.524 1
 -3 9 -3 8143.47 1281.08 1
 -3 9 -4 615.506 312.304 1
 -3 9 -5 2020.7 662.895 1
 -3 9 -6 7062.88 1247.38 1
 -3 9 -7 -224.22 377.538 1
 -3 9 -8 4372.89 1023.15 1
 -3 9 -9 1693.56 690.374 1
 -3 9 -10 1586.97 677.5 1
 -3 9 -11 3037.16 931.601 1
 -3 9 -12 -88.141 284.486 1
 -3 9 -13 2259.63 845.17 1
 3 10 -10 2075.49 786.762 2
 3 10 -9 48.9576 432.191 2
 3 10 -8 3937.11 1027.78 2
 3 10 -7 667.317 463.778 2
 3 10 -6 3029.94 912.472 2
 3 10 -5 1637.57 679.016 2
 -3 10 4 -306.324 386.185 2
 3 10 -4 499.996 406.668 2
 3 10 -3 4575.11 1105.91 2
 -3 10 3 4280.16 920.768 2
 -3 10 2 10651.8 1436.61 2
 -3 10 1 238.282 340.107 2
 -3 10 0 2563.13 742.389 2
 -3 10 -1 749.716 491.673 2
 -3 10 -2 13493.4 1664.72 2
 -3 10 -3 4741.33 1012.22 2
 -3 10 -5 2101.32 720.51 1
 -3 10 -6 2071.52 757.07 1
 -3 10 -7 196.703 331.293 1
 -3 10 -8 2616.46 855.911 1
 -3 10 -9 879.974 579.474 1
 -3 10 -10 931.384 535.466 1
 -3 10 -11 334.046 412.277 1
 -3 10 -12 984.124 599.135 1
 -3 11 4 1348.99 600.391 2
 3 11 -4 795.645 577.006 2
 -3 11 3 4009.46 962.114 2
 -3 11 2 -309.851 324.752 2
 -3 11 1 520.61 473.718 2
 -3 11 0 338.094 422.939 2
 -3 11 -1 868.624 515.993 2
 -3 11 -2 544.704 438.52 2
 -3 11 -3 3904.89 982.702 2
 -3 11 -4 618.479 507.277 2
 -3 11 -5 985.863 620.576 2
 -3 12 2 622.96 475.423 2
 -3 12 1 718.211 521.121 2
 -4 0 0 -63.7375 246.401 1
 -4 0 1 237754 4531.64 1
 -4 0 -1 230952 4555.88 1
 -4 0 2 36636.6 1779.47 1
 -4 0 -2 35601.5 1826.64 1
 -4 0 -3 337528 5700.28 1
 -4 0 4 301713 2827.71 2
 -4 0 -4 312203 5560.22 1
 -4 0 -5 11046.8 1076.2 1
 -4 0 -6 47828.3 2267.61 1
 -4 0 -7 39029.6 2122.85 1
 -4 0 -8 14953.7 1368.41 1
 -4 0 -9 8123.55 1038.36 1
 -4 0 -10 25673.5 1851.02 1
 -4 0 -11 -146.037 247.831 1
 -4 0 -12 6810.58 1037.77 1
 -4 0 -13 3575.08 824.799 1
 -4 0 -14 27492 2192.8 1
 -4 0 -15 2660.43 710.296 1
 -4 0 -16 9001.39 1349.91 1
 -4 0 -17 4486.65 981.95 1
 -4 0 -18 368.138 400.221 1
 4 0 -19 2672.38 743.324 1
 -4 0 -19 947.373 538.675 1
 -4 0 -20 2386.47 799.407 1
 4 0 -20 3515.29 852.946 1
 -4 0 -21 698.024 472.124 1
 -4 -1 -21 2687.17 835.887 1
 -4 -1 -20 2360.99 777.42 1
 4 1 -19 270.79 378.856 1
 -4 -1 -19 805.597 515.172 1
 -4 -1 -18 1895.93 667.31 1
 4 1 -18 863.607 476.142 1
 -4 -1 -17 30.0803 303.43 1
 -4 -1 -16 1307.36 525.584 1
 -4 -1 -15 4176.95 852.893 1
 -4 -1 -14 3542.18 797.005 1
 -4 -1 -13 1724.88 560.078 1
 -4 -1 -12 3942.85 737.473 1
 4 1 -11 12309.6 763.455 2
 -4 -1 -11 9433.11 1135.93 1
 4 1 -10 4451.05 451.69 2
 -4 -1 -10 4101.55 738.114 1
 4 1 -9 8931.4 616.43 2
 -4 -1 -9 8721.95 1019.02 1
 4 1 -8 6674.62 527.28 2
 -4 -1 -8 7580.62 916.629 1
 -4 -1 -7 5244.95 743.188 1
 -4 -1 -6 5585.94 744.442 1
 -4 -1 -5 23103.4 1469.63 1
 -4 -1 -4 19938.9 1328.91 1
 -4 -1 -3 2287.75 434.802 1
 -4 1 3 1391.74 423.104 1
 -4 1 2 62697.4 2463.38 1
 -4 -1 -2 67687 2348.82 1
 -4 1 1 2354.16 500.512 1
 -4 -1 -1 2353.44 464.794 1
 -4 -1 0 119753 3051.71 1
 -4 1 0 120614 3473.69 1
 -4 1 -1 2244.79 509.54 1
 -4 -1 1 2253.03 424.096 1
 -4 1 -2 66092.3 2618.08 1
 -4 1 -3 2010.8 503.601 1
 -4 -1 4 18414 856.5 2
 -4 1 -4 18752.8 1439.88 1
 -4 1 -5 23470.5 1665.49 1
 -4 1 -6 6312.02 884.157 1
 -4 1 -7 4955.87 806.037 1
 -4 1 -8 7310.67 991.564 1
 -4 1 -9 9651.36 1168.68 1
 -4 1 -10 4783.23 841.77 1
 -4 1 -11 11774.2 1387.14 1
 -4 1 -12 4683.31 912.37 1
 -4 1 -13 1933.27 643.892 1
 -4 1 -14 3706.17 850.656 1
 -4 1 -15 3962.66 890.35 1
 -4 1 -16 322.897 442.197 1
 -4 1 -17 20.24 255.77 1
 -4 1 -18 2010.23 717.098 1
 -4 1 -19 933.997 547.313 1
 -4 1 -20 1095.98 585.44 1
 4 -1 -20 1991.62 653.147 1
 4 2 -19 1122.63 530.56 1
 4 2 -18 1672.88 553.347 1
 -4 -2 -18 1866.7 625.587 1
 4 2 -17 2142.62 648.968 1
 -4 -2 -17 2205.3 649.496 1
 -4 -2 -16 1577.5 522.841 1
 -4 -2 -15 1737.94 538.776 1
 -4 -2 -14 1955.97 538.413 1
 -4 -2 -13 6665.39 986.262 1
 -4 -2 -12 769.772 339.333 1
 -4 -2 -11 1007.28 393.575 1
 4 2 -11 752.488 257.696 2
 4 2 -10 15983.3 1037.1 2
 -4 -2 -10 18135.5 1447.81 1
 4 2 -9 8892.89 760.363 2
 -4 -2 -9 10734.5 1080.8 1
 4 2 -8 5697.85 605.106 2
 -4 -2 -8 6557.78 804.732 1
 4 2 -7 6017.97 630.891 2
 -4 -2 -7 7267.07 822.9 1
 -4 -2 -6 464.043 238.12 1
 -4 -2 -5 44577.9 1902.76 1
 -4 2 4 8939.25 990.195 1
 -4 -2 -4 9354.5 846.124 1
 -4 2 3 38588.2 2020.65 1
 -4 -2 -3 40490 1723.15 1
 -4 2 2 68071.3 2697.37 1
 -4 -2 -2 64056.3 2109.82 1
 -4 -2 -1 79795.7 2343.75 1
 -4 2 1 79054.1 2927.35 1
 -4 2 0 896.417 384.711 1
 -4 2 -1 73438.9 2871.5 1
 -4 2 -2 65116.3 2740.65 1
 -4 2 -3 40128.6 2202.94 1
 -4 2 -4 9003 1073.81 1
 -4 2 -5 45845.1 2405.31 1
 -4 2 -6 283.509 312.835 1
 -4 2 -7 8327.29 1100.51 1
 -4 2 -8 7306.7 1040.94 1
 -4 2 -9 9974.22 1261.35 1
 -4 2 -10 16106 1592.66 1
 -4 2 -11 1511.84 578.94 1
 -4 2 -12 1392.15 598.204 1
 -4 2 -13 8452.07 1253.59 1
 -4 2 -14 1220.62 564.648 1
 -4 2 -15 1523.33 541.003 1
 -4 2 -16 2016.13 736.654 1
 -4 2 -17 2081.55 708.835 1
 -4 2 -18 1939.22 759.69 1
 -4 2 -19 130.136 468.394 1
 -4 2 -20 6364.05 1366.63 1
 4 -2 -20 5152.27 1007.41 1
 4 3 -19 3125.85 836.979 1
 4 3 -18 1037.43 515.407 1
 4 3 -17 5445.32 1024.72 1
 4 3 -16 1416.8 517.387 1
 4 3 -15 967.768 416.202 1
 -4 -3 -14 546.338 299.788 1
 -4 -3 -13 741.926 363.838 1
 4 3 -12 8793.84 905.823 2
 -4 -3 -12 8111.91 997.957 1
 4 3 -11 3880.68 596.234 2
 -4 -3 -11 3243.19 610.11 1
 4 3 -10 49001.1 2070.38 2
 -4 -3 -10 48913.6 2244.8 1
 4 3 -9 30397.7 1622.08 2
 -4 -3 -9 30444.8 1690.04 1
 4 3 -8 4152.84 599.269 2
 -4 -3 -8 3719.67 573.944 1
 4 3 -7 23631.1 1406.02 2
 -4 -3 -7 23435.9 1379.95 1
 4 3 -6 724.131 281.523 2
 -4 -3 -6 685.503 244.784 1
 -4 -3 -5 5351.11 605.318 1
 -4 3 5 5324.29 365.697 2
 -4 3 4 37420.9 2063.1 1
 -4 -3 -4 34086.5 1468.61 1
 -4 -3 -3 16363.6 979.261 1
 -4 3 3 15981.7 1361 1
 -4 -3 -2 16294.1 971.319 1
 -4 3 2 17455.7 1448.31 1
 -4 3 1 47585.4 2394.16 1
 -4 3 0 5300.2 855.334 1
 -4 3 -1 42743.8 2305.6 1
 -4 3 -2 16449.3 1469.24 1
 -4 3 -3 15486.5 1442.29 1
 -4 3 -4 35586 2224.22 1
 -4 3 -5 5332.76 893.761 1
 -4 3 -6 592.116 350.682 1
 -4 3 -7 23246 1921.76 1
 -4 3 -8 3467.98 793.907 1
 -4 3 -9 28231.7 2166.81 1
 -4 3 -10 47972.1 2878.16 1
 -4 3 -11 3573.21 843.903 1
 -4 3 -12 8720.18 1318.65 1
 -4 3 -13 175.988 340.421 1
 -4 3 -14 -254.828 377.655 1
 -4 3 -15 1394.36 687.842 1
 -4 3 -16 1413.75 670.793 1
 -4 3 -17 4215.42 1050.54 1
 -4 3 -18 1328.27 651.237 1
 -4 3 -19 4261.45 1110.96 1
 4 4 -18 3535.27 861.959 1
 4 4 -17 306.212 295.126 1
 4 4 -16 1373.6 536.422 1
 4 4 -15 578.209 380.289 1
 4 4 -14 3974.32 791.726 1
 4 4 -13 5986.38 930.716 1
 4 4 -13 4954.64 775.443 2
 4 4 -12 1059.12 379.934 2
 4 4 -12 758.67 443.002 1
 4 4 -11 35403.8 1994.8 2
 4 4 -10 13722.5 1243.92 2
 -4 -4 -10 10885.3 967.449 1
 4 4 -9 34842.3 1940.62 2
 -4 -4 -9 36710.1 1686.56 1
 4 4 -8 9122.42 991.914 2
 -4 -4 -8 10350.8 860.655 1
 4 4 -7 22620 1539.85 2
 -4 -4 -7 26122.6 1260.92 1
 4 4 -6 14568.9 1245.5 2
 -4 -4 -6 15614.1 928.392 1
 -4 -4 -5 1073.56 237.723 1
 4 4 -5 1247.26 380.973 2
 -4 4 5 922.862 209.523 2
 -4 4 5 1397.28 478.423 1
 -4 4 4 8066.46 1006.48 1
 -4 4 4 6840.43 575.307 2
 -4 -4 -4 6327.9 535.099 1
 -4 4 3 32775 2006.27 1
 -4 4 2 26436.5 1834.67 1
 -4 4 1 4085.11 764.482 1
 -4 4 0 22893 1772.23 1
 -4 4 -1 3936.91 723.675 1
 -4 4 -2 22227.8 1771.11 1
 4 4 2 23622.7 1141.52 1
 -4 4 -3 31573.8 2162.27 1
 4 4 3 30854.5 1211.27 1
 4 4 4 6025.83 496.252 1
 -4 4 -4 6079.7 1020.65 1
 -4 4 -5 805.456 380.031 1
 -4 4 -6 14955.4 1545.92 1
 -4 4 -7 26941 2116.4 1
 -4 4 -8 11269.2 1416.87 1
 -4 4 -9 36796.7 2559.5 1
 -4 4 -10 11111.4 1491.14 1
 -4 4 -11 32869.7 2550.35 1
 -4 4 -12 246.6 461.531 1
 -4 4 -13 4340.33 980.553 1
 -4 4 -14 2956.82 823.029 1
 -4 4 -15 578.107 542.651 1
 -4 4 -16 827.87 538.85 1
 -4 4 -17 -117.631 266.747 1
 -4 4 -18 2608.82 894.375 1
 4 5 -18 2657.82 783.824 1
 4 5 -17 2863.06 814.201 1
 4 5 -16 4074.54 887.046 1
 4 5 -15 3320.95 799.019 1
 4 5 -14 5269.67 937.888 1
 4 5 -13 19038.9 1664.97 2
 4 5 -13 18849.8 1650.31 1
 4 5 -12 8964.91 1131.97 2
 4 5 -12 10844.1 1196.54 1
 4 5 -11 7662.48 971.518 1
 4 5 -11 8023.68 1051.99 2
 4 5 -10 16973.2 1513.77 2
 4 5 -10 18123.2 1441.72 1
 4 5 -9 14184.1 1373.98 2
 4 5 -9 16144.4 1287.66 1
 4 5 -8 7095.64 969.929 2
 4 5 -7 26446.9 1833.33 2
 4 5 -6 -151.639 295.694 2
 -4 5 6 343.445 184.397 2
 4 5 -5 1525.51 482.076 2
 -4 5 5 2140.45 375.55 2
 -4 5 5 1266.25 430.7 1
 -4 5 4 7430.38 998.219 1
 4 5 -4 8162.22 1012.08 2
 -4 5 4 9194.18 779.488 2
 -4 5 3 7645.22 1020.29 1
 -4 5 2 995.252 419.129 1
 -4 5 1 13992.7 1410.56 1
 -4 5 0 21554.4 1779.76 1
 -4 5 -1 11576.4 1307.29 1
 -4 5 -2 448.267 299.408 1
 -4 5 -3 7607.38 1102.44 1
 -4 5 -4 7042.98 1096.59 1
 -4 5 -5 2685.9 682.99 1
 -4 5 -6 -526.354 513.321 1
 -4 5 -7 25366.4 2142.9 1
 -4 5 -8 4781.7 974.822 1
 -4 5 -9 13809.7 1662.28 1
 -4 5 -10 15296.1 1793.04 1
 -4 5 -11 8459.56 1366.85 1
 -4 5 -12 8588.33 1375.96 1
 -4 5 -13 17243.3 1992.01 1
 -4 5 -14 2022.8 720.488 1
 -4 5 -15 3314.09 964.446 1
 -4 5 -16 4970.75 1191.35 1
 -4 5 -17 2005.66 791.411 1
 4 6 -17 2489.17 734.34 1
 4 6 -16 293.518 279.704 1
 4 6 -15 1776.02 559.488 1
 4 6 -14 689.933 365.285 2
 4 6 -14 733.394 417.512 1
 4 6 -13 -29.2652 223.597 2
 4 6 -13 6.35303 225.069 1
 4 6 -12 2079.65 598.635 2
 4 6 -12 1945.68 535.881 1
 4 6 -11 1147.96 487.378 2
 4 6 -11 1088.59 425.293 1
 4 6 -10 894.936 419.26 2
 4 6 -10 1404.78 453.756 1
 4 6 -9 26816.2 2032.61 2
 4 6 -9 28733.5 1780.36 1
 4 6 -8 2943.98 713.418 2
 4 6 -8 3397.56 620.422 1
 4 6 -7 21374.6 1800.53 2
 4 6 -7 23804.4 1493.73 1
 4 6 -6 10165.1 1238.28 2
 -4 6 6 10777.5 951.406 2
 4 6 -6 9950.29 924.937 1
 4 6 -5 28046.2 2026.17 2
 -4 6 5 32729.5 1674.25 2
 -4 6 5 32432.7 2141.36 1
 4 6 -5 30805.8 1527.4 1
 4 6 -4 15164.7 1504.38 2
 -4 6 4 17545.4 1246.45 2
 -4 6 4 14019.1 1424.16 1
 4 6 -4 14354.2 989.892 1
 -4 6 3 3485.03 732.003 1
 -4 6 3 4300.11 625.378 2
 4 6 -3 2919.45 427.811 1
 -4 6 2 4504.49 878.27 1
 4 6 -2 4105.3 458.359 1
 -4 6 1 1028.85 447.223 1
 4 6 -1 1287.91 242.704 1
 -4 6 0 -314.124 313.782 1
 -4 6 -1 1170.39 443.629 1
 -4 6 -2 4895.28 940.428 1
 -4 6 -3 3214.72 768.812 1
 -4 6 -4 14084.9 1598.44 1
 -4 6 -5 28361.6 2276.44 1
 -4 6 -6 11225.2 1462.95 1
 -4 6 -7 21014.5 2055.18 1
 -4 6 -8 3791.56 958.293 1
 -4 6 -9 25423.6 2336.47 1
 -4 6 -10 482.386 535.791 1
 -4 6 -11 593.937 490.633 1
 -4 6 -12 643.314 502.928 1
 -4 6 -13 706.984 595.214 1
 -4 6 -14 -479.81 475.382 1
 -4 6 -15 1040.2 597.215 1
 -4 6 -16 -128.672 341.465 1
 4 7 -16 1161.61 536.593 1
 4 7 -15 4603.7 961.789 1
 4 7 -14 31.4827 303.206 2
 4 7 -14 -231.817 282.598 1
 4 7 -13 1221.35 517.93 2
 4 7 -13 1647.12 539.378 1
 4 7 -12 1297.31 510.108 2
 4 7 -12 692.018 357.593 1
 4 7 -11 2056.24 540.186 1
 4 7 -11 1452.49 616.322 2
 4 7 -10 167.249 311.469 2
 4 7 -10 786.35 401.062 1
 4 7 -9 -59.5688 145.679 1
 4 7 -9 456.553 257.255 2
 4 7 -8 4717.66 733.697 1
 4 7 -8 2675.26 712.991 2
 4 7 -7 6058.93 804.066 1
 4 7 -7 5112.05 943.705 2
 -4 7 6 5253.97 755.829 2
 4 7 -6 5210.29 997.102 2
 4 7 -6 6524.87 791.332 1
 4 7 -5 17763.4 1767.06 2
 -4 7 5 18492.8 1413.25 2
 -4 7 5 15948.5 1566.88 1
 4 7 -5 19328.7 1271.81 1
 -4 7 4 5883.36 959.274 1
 4 7 -4 5912.35 1033.64 2
 -4 7 4 4909.37 745.41 2
 -4 7 3 5486.61 954.896 1
 -4 7 3 6032.15 836.002 2
 -4 7 2 156.304 261.031 1
 -4 7 2 252.103 201.96 2
 -4 7 1 -213.792 429.892 1
 -4 7 0 -90.7717 249.873 1
 -4 7 -1 -57.3557 387.246 1
 -4 7 -2 354.661 271.263 1
 -4 7 -3 4545.08 948.373 1
 -4 7 -4 5267.72 1024.68 1
 -4 7 -5 18027.1 1914.77 1
 -4 7 -6 3570.41 936.665 1
 -4 7 -7 4668.18 1061.05 1
 -4 7 -8 3918.68 954.082 1
 -4 7 -9 -196.619 385.058 1
 -4 7 -10 908.045 535.253 1
 -4 7 -11 1361.51 661.135 1
 -4 7 -12 996.47 526.127 1
 -4 7 -13 904.512 495.366 1
 -4 7 -14 229.409 371.849 1
 -4 7 -15 3183.03 956.562 1
 4 8 -15 -532.567 394.296 1
 4 8 -14 285.362 344.797 2
 4 8 -14 423.034 347.461 1
 4 8 -13 809.136 495.877 2
 4 8 -13 192.73 261.193 1
 4 8 -12 2208.7 737.877 2
 4 8 -12 976.526 433.241 1
 4 8 -11 1086.11 489.669 2
 4 8 -11 1320.82 484.452 1
 4 8 -10 879.851 548.497 2
 4 8 -10 -100.878 252.649 1
 4 8 -9 410.868 376.644 2
 4 8 -8 6386.23 1148.27 2
 4 8 -7 3491.02 901.852 2
 4 8 -6 8938.53 1348.38 2
 4 8 -5 -4.09711 359.284 2
 -4 8 5 581.895 344.466 2
 -4 8 5 115.648 211.017 1
 -4 8 4 1927.98 592.489 1
 4 8 -4 2116.9 734.983 2
 -4 8 4 1740.78 510.827 2
 -4 8 3 6274.38 1032.64 1
 -4 8 3 6213.5 917.377 2
 -4 8 2 2444.91 657.3 1
 -4 8 2 3604.41 719.706 2
 -4 8 1 10610.8 1231.58 2
 -4 8 1 7630.66 1187.46 1
 -4 8 0 967.026 492.169 1
 -4 8 -1 9542.11 1367.43 1
 -4 8 -2 2508.63 735.762 1
 -4 8 -3 4942.61 1069.64 1
 -4 8 -4 1601.64 677.687 1
 -4 8 -5 712.349 499.342 1
 -4 8 -6 8984.8 1431.96 1
 -4 8 -7 4311.36 1040.24 1
 -4 8 -8 4306.2 1028.82 1
 -4 8 -9 -126.939 591.505 1
 -4 8 -10 145.211 268.878 1
 -4 8 -11 1607.8 630.512 1
 -4 8 -12 1594.38 768.254 1
 -4 8 -13 -1167.26 673.953 1
 -4 8 -14 106.223 290.551 1
 4 9 -13 1987.49 755.677 2
 4 9 -12 5630.62 1211.16 2
 4 9 -11 1410.22 636.384 2
 4 9 -10 -176.179 242.804 2
 4 9 -9 3567.36 949.48 2
 4 9 -8 10786.8 1578.41 2
 4 9 -7 4738.66 1053.07 2
 4 9 -6 523.035 343.983 2
 4 9 -5 1848.15 681.797 2
 -4 9 4 230.887 268.205 2
 -4 9 3 1128.79 487.713 2
 -4 9 2 333.684 299.746 1
 -4 9 2 884.123 444.476 2
 -4 9 1 1111.56 499.984 1
 -4 9 1 1447.96 509.661 2
 -4 9 0 3975.75 908.887 1
 -4 9 0 3948.73 832.647 2
 -4 9 -1 1731.22 612.056 1
 -4 9 -2 -377.23 350.295 1
 -4 9 -3 1457.67 603.294 1
 -4 9 -4 248.896 301.426 1
 -4 9 -5 835.541 497.145 1
 -4 9 -6 520.238 414.998 1
 -4 9 -7 5123.52 1159.32 1
 -4 9 -8 9191.29 1562.53 1
 -4 9 -9 1650.2 764.517 1
 -4 9 -10 -382.68 416.95 1
 -4 9 -11 1205.71 688.391 1
 -4 9 -12 3720.51 1092.15 1
 4 10 -10 4292.03 1176.86 2
 4 10 -9 -110.691 356.438 2
 4 10 -8 1302.34 652.53 2
 4 10 -7 360.196 391.333 2
 4 10 -6 5154.41 1180.51 2
 -4 10 3 461.359 411.312 2
 -4 10 2 5105.02 998.766 2
 -4 10 1 1367.08 553.238 2
 -4 10 0 4820.4 972.649 2
 -4 10 -1 2260.68 701.451 2
 -4 10 -2 8123.57 1292.94 2
 -4 10 -3 -641.686 438.406 1
 -4 10 -4 7458.1 1348.39 1
 -4 10 -5 2347.78 795.702 1
 -4 10 -6 5323.74 1203.49 1
 -4 10 -7 218.54 397.33 1
 -4 10 -8 3165.25 965.174 1
 -4 10 -9 1012.59 664.823 1
 -4 10 -10 2136.4 832.671 1
 -4 11 2 894.196 518.764 2
 -4 11 1 1643.34 713.849 2
 -4 11 0 -47.3254 265.534 2
 -4 11 -1 273.381 388.73 2
 -4 11 -2 -542.979 390.841 2
 -4 11 -3 1081.21 597.935 2
 -4 11 -4 509.644 407.027 2
 -5 0 0 27.0117 211.449 1
 -5 0 1 3.52604 174.403 1
 -5 0 -1 135.34 194.85 1
 -5 0 -2 2203.59 608.757 1
 -5 0 2 2548.11 540.253 1
 -5 0 -3 8241.64 1000.2 1
 -5 0 4 3860.87 380.316 2
 -5 0 -4 5222.54 817.694 1
 -5 0 5 68126.3 1383.33 2
 -5 0 -5 73222 3082.81 1
 -5 0 -6 6025.03 902.387 1
 -5 0 -7 2857.02 692.863 1
 -5 0 -8 7806.59 1066.44 1
 -5 0 -9 25677.4 1988.22 1
 -5 0 -10 118.608 233.098 1
 -5 0 -11 2787.25 696.395 1
 -5 0 -12 2778.91 738.901 1
 -5 0 -13 2837.07 776.946 1
 -5 0 -14 8395.1 1296.78 1
 -5 0 -15 7578.42 1262.93 1
 -5 0 -16 1965.24 698.042 1
 -5 0 -17 222.823 392.053 1
 -5 0 -18 5628.19 1190.15 1
 -5 0 -19 2243.27 800.672 1
 -5 0 -20 2429.42 859.044 1
 -5 -1 -19 142 350.834 1
 -5 -1 -18 556.762 406.356 1
 -5 -1 -17 991.562 482.535 1
 -5 -1 -16 2258.72 727.432 1
 -5 -1 -15 360.291 370.037 1
 -5 -1 -14 1709.16 551.299 1
 -5 -1 -13 3098.2 720.251 1
 -5 -1 -12 2140.09 616.436 1
 -5 -1 -11 22414.3 1884.58 1
 -5 -1 -10 21552.5 1804.61 1
 -5 -1 -9 27394.4 1969.09 1
 -5 -1 -8 31282.3 2038.47 1
 -5 -1 -7 2637.56 584.468 1
 -5 -1 -6 5780.7 856.663 1
 -5 1 5 22155 571.175 2
 -5 -1 -5 27861.8 1804.09 1
 -5 -1 -4 3703.26 666.416 1
 -5 1 3 24874 1750.06 1
 -5 -1 -3 26038 1677.06 1
 -5 1 2 17766.7 1458.36 1
 -5 -1 -2 17317.2 1363.93 1
 -5 1 1 8253.57 1004.69 1
 -5 -1 -1 9308.94 984.167 1
 -5 -1 0 24612.3 1564.06 1
 -5 1 0 20156.5 1581.05 1
 -5 -1 1 8712.43 952.535 1
 -5 1 -1 10178.7 1120.82 1
 -5 1 -2 16540.6 1466.42 1
 -5 1 -3 27337.3 1876.09 1
 -5 1 -4 4492.8 783.728 1
 -5 1 -5 26956.1 1962.13 1
 -5 1 -6 4886.18 870.758 1
 -5 1 -7 924.052 448.186 1
 -5 1 -8 29407.9 2142.12 1
 -5 1 -9 25180.1 2051.44 1
 -5 1 -10 27330.9 2172.26 1
 -5 1 -11 21639.5 1994.96 1
 -5 1 -12 799.741 454.075 1
 -5 1 -13 4211.98 928.416 1
 -5 1 -14 4013.46 986.614 1
 -5 1 -15 696.683 459.458 1
 -5 1 -16 2025.96 712.707 1
 -5 1 -17 1300.79 608.439 1
 -5 1 -18 139.786 476.534 1
 -5 1 -19 143.641 417.968 1
 -5 1 -20 5330.57 1277.9 1
 5 2 -18 2441.25 700.356 1
 -5 -2 -16 1964.44 629.009 1
 -5 -2 -15 2172.49 640.089 1
 -5 -2 -14 4354.99 882.175 1
 -5 -2 -13 2299.37 630.6 1
 -5 -2 -12 3189.26 708.587 1
 -5 -2 -11 104.599 270.093 1
 -5 -2 -10 302.569 283.259 1
 -5 -2 -9 9103.55 1095.5 1
 -5 -2 -8 16029.3 1417.57 1
 -5 -2 -7 10930.9 1140.96 1
 -5 -2 -6 28603.6 1762.38 1
 -5 -2 -5 30380.5 1778.51 1
 -5 2 4 29755.7 1966 1
 -5 -2 -4 32365 1795.56 1
 -5 2 3 21335.8 1646.25 1
 -5 -2 -3 21037.4 1433.63 1
 -5 2 2 18366.4 1545.15 1
 -5 -2 -2 16512.3 1229.04 1
 -5 -2 -1 60344.1 2325.32 1
 -5 2 1 58814.4 2777.6 1
 -5 2 0 -28.734 251.106 1
 -5 -2 0 306.071 166.319 1
 -5 2 -1 58205.8 2825.16 1
 -5 2 -2 20507.4 1688.91 1
 -5 2 -3 19526 1691.34 1
 -5 2 -4 34467.7 2262.11 1
 -5 2 -5 33856.4 2299.7 1
 -5 2 -6 27464.9 2080.49 1
 -5 2 -7 10892.8 1356.69 1
 -5 2 -8 16312.6 1665.3 1
 -5 2 -9 10549.9 1394.11 1
 -5 2 -10 184.702 372.508 1
 -5 2 -11 975.625 509.746 1
 -5 2 -12 1299.58 452.086 1
 -5 2 -13 1410.45 583.661 1
 -5 2 -14 3596.51 936.768 1
 -5 2 -15 2316.6 814.232 1
 -5 2 -16 2099.22 731.46 1
 -5 2 -17 6918.28 1346.45 1
 -5 2 -18 1793.75 735.75 1
 -5 2 -19 1205.97 635.174 1
 5 3 -18 1970.95 673.519 1
 5 3 -17 1358.15 516.23 1
 -5 -3 -12 8067.66 1055.8 1
 -5 -3 -11 10023.2 1140.72 1
 5 3 -10 40022.8 1924.48 2
 -5 -3 -10 38119.4 2146.9 1
 5 3 -9 10343.6 982.298 2
 -5 -3 -9 11246.7 1144.38 1
 -5 -3 -8 12252.9 1155.18 1
 -5 -3 -7 8688.38 935.94 1
 -5 -3 -6 32413.6 1761.39 1
 -5 3 5 10422.7 496.237 2
 -5 -3 -5 9884.77 949.783 1
 -5 3 4 13702.2 1387.35 1
 -5 -3 -4 13065.8 1054.33 1
 -5 -3 -3 9165.72 873.754 1
 -5 3 3 9690.83 1182.08 1
 -5 3 2 5589.44 909.885 1
 -5 -3 -2 5686.03 681.292 1
 -5 3 1 3042.47 653.974 1
 -5 3 0 41238 2445.22 1
 -5 3 -1 2924.71 712.811 1
 -5 3 -2 4428.16 845.194 1
 -5 3 -3 8560.52 1187.72 1
 -5 3 -4 12314.7 1441.61 1
 -5 3 -5 11526.6 1447.91 1
 -5 3 -6 30442.3 2305.26 1
 -5 3 -7 9542.18 1308.6 1
 -5 3 -8 11010.4 1433.4 1
 -5 3 -9 10416.6 1445.75 1
 -5 3 -10 35194.7 2649.05 1
 -5 3 -11 7652.35 1297 1
 -5 3 -12 6307.83 1188.62 1
 -5 3 -13 5824.15 1170.83 1
 -5 3 -14 4124.51 1041.84 1
 -5 3 -15 8376.25 1452.51 1
 -5 3 -16 1766.53 719.776 1
 -5 3 -17 1518.55 739.887 1
 -5 3 -18 1359.16 698.76 1
 5 4 -17 3571.97 866.223 1
 5 4 -16 1593.48 579.832 1
 5 4 -15 251.017 301.47 1
 5 4 -11 2896.42 597.518 2
 5 4 -10 4552.52 735.43 2
 5 4 -9 22741.6 1630.15 2
 5 4 -8 9728.06 1085.12 2
 -5 -4 -8 9909.02 942.548 1
 -5 -4 -7 8663.79 841.548 1
 -5 -4 -6 11127.8 927.715 1
 -5 -4 -5 4237.93 546.908 1
 -5 4 5 4264.01 415.44 2
 -5 4 5 4147.43 805.819 1
 -5 4 4 6473.54 982.057 1
 -5 -4 -4 8023.21 741.883 1
 -5 4 3 41167.3 2437.3 1
 -5 4 2 1522.42 503.495 1
 -5 4 1 5086.35 887.147 1
 -5 4 0 9340.99 1227.01 1
 -5 4 -1 5837.93 1027.8 1
 -5 4 -2 1550.7 551.54 1
 -5 4 -3 46695.9 2834.64 1
 -5 4 -4 9467.69 1301.38 1
 -5 4 -5 4371.98 932.855 1
 -5 4 -6 14339.5 1641.81 1
 -5 4 -7 5376.18 974.229 1
 -5 4 -8 9594.15 1405.44 1
 -5 4 -9 23936.8 2248.62 1
 -5 4 -10 4942.39 1081.65 1
 -5 4 -11 1671.68 667.394 1
 -5 4 -12 1141.32 663.749 1
 -5 4 -13 3137.73 916.108 1
 -5 4 -14 2445.33 834.675 1
 -5 4 -15 847.235 526.888 1
 -5 4 -16 2303.25 805.625 1
 -5 4 -17 3375.54 1050.97 1
 5 5 -17 1424.77 575.386 1
 5 5 -16 2356 698.472 1
 5 5 -15 747.084 395.087 1
 5 5 -14 1541.33 524.681 1
 5 5 -13 1126.15 457.166 1
 5 5 -12 8779.18 1125.16 1
 5 5 -11 4058.25 778.502 2
 5 5 -10 9448.69 1166.14 2
 5 5 -9 35213.3 2234.62 2
 5 5 -8 12405.4 1339.83 2
 -5 5 5 14416.7 926.205 2
 -5 5 5 13817.9 1480.07 1
 -5 5 4 2106.51 640.289 1
 -5 5 4 2162.37 380.814 2
 -5 5 3 144.8 224.736 1
 -5 5 2 4177.85 843.228 1
 -5 5 1 8102.26 1176.1 1
 -5 5 0 1761.38 603.937 1
 -5 5 -1 9328.11 1276.31 1
 -5 5 -2 4010.77 883.181 1
 -5 5 -3 843.28 586.931 1
 -5 5 -4 2505.65 743.736 1
 -5 5 -5 12700.2 1625.11 1
 -5 5 -6 3148.86 901.779 1
 -5 5 -7 16347 1842.67 1
 -5 5 -8 11377.1 1547.66 1
 -5 5 -9 37548.9 2859.57 1
 -5 5 -10 12089 1672.41 1
 -5 5 -11 2923.88 902.312 1
 -5 5 -12 5356.51 1179.82 1
 -5 5 -13 846.452 545.503 1
 -5 5 -14 1169.9 670.196 1
 -5 5 -15 419.878 504.841 1
 -5 5 -16 289.72 447.635 1
 5 6 -16 1337.48 556.052 1
 5 6 -15 3441.86 818.49 1
 5 6 -14 2971.48 759.162 1
 5 6 -13 1518.83 514.527 1
 5 6 -12 305.808 289.339 2
 5 6 -12 -152.818 284.544 1
 5 6 -11 201.144 230.763 2
 5 6 -11 -129.025 291.228 1
 5 6 -10 -19.519 233.848 1
 5 6 -10 1524.62 506.476 2
 5 6 -9 3919.23 840.197 2
 5 6 -9 4517.27 725.746 1
 5 6 -8 2278.82 656.836 2
 5 6 -8 1006.36 362.032 1
 5 6 -7 19080.7 1789.88 2
 5 6 -7 19559 1400.08 1
 -5 6 5 25578 2060.65 1
 -5 6 4 26960.8 1505.09 2
 -5 6 4 23117.7 1986.31 1
 -5 6 3 3185.15 765.395 1
 -5 6 2 3775.6 851.834 1
 -5 6 1 4609.95 966.631 1
 -5 6 0 19047.8 1870.35 1
 -5 6 -1 5339.03 1011.14 1
 -5 6 -2 3543.01 850.093 1
 -5 6 -3 1584.3 606.15 1
 -5 6 -4 23671.7 2225.06 1
 -5 6 -5 26878.2 2359.48 1
 -5 6 -6 3713.85 979.18 1
 -5 6 -7 17235.5 1962.95 1
 -5 6 -8 0.9356 492.224 1
 -5 6 -9 3861.54 1011.13 1
 -5 6 -10 654.101 449.198 1
 -5 6 -11 864.199 553.731 1
 -5 6 -12 1558.32 695.049 1
 -5 6 -13 435.864 359.69 1
 -5 6 -14 5340.51 1279.22 1
 -5 6 -15 1793.87 751.433 1
 5 7 -15 484.155 443.074 1
 5 7 -14 1585.51 601.474 1
 5 7 -13 2168.04 632.397 1
 5 7 -12 3790.39 889.257 2
 5 7 -12 3582.88 781.291 1
 5 7 -11 395.534 365.26 2
 5 7 -11 607.816 386.69 1
 5 7 -10 2926.55 797.009 2
 5 7 -10 2649.8 614.568 1
 5 7 -9 4343.58 931.343 2
 5 7 -9 3272.28 659.059 1
 5 7 -8 261.861 361.625 2
 5 7 -8 242.956 202.785 1
 5 7 -7 7405.3 1201.02 2
 5 7 -7 6545.88 851.112 1
 -5 7 5 741.493 325.889 1
 -5 7 4 3187.41 770.322 1
 -5 7 3 517.344 361.649 1
 -5 7 3 2328.4 517.058 2
 -5 7 2 825.979 415 1
 -5 7 1 5149.31 1025.98 1
 -5 7 0 17140.9 1860.43 1
 -5 7 -1 5884.22 1121.87 1
 -5 7 -2 2621.65 788.711 1
 -5 7 -3 867.41 515.53 1
 -5 7 -4 5226.31 1100.06 1
 -5 7 -5 696.909 464.746 1
 -5 7 -6 258.042 251.086 1
 -5 7 -7 7483.54 1369.44 1
 -5 7 -8 535.601 405.202 1
 -5 7 -9 1904.03 708.984 1
 -5 7 -10 2836.64 928.483 1
 -5 7 -11 728.759 476.482 1
 -5 7 -12 4788.87 1215.83 1
 -5 7 -13 1204.11 654.364 1
 -5 7 -14 1741.19 743.924 1
 5 8 -14 1080.89 536.586 1
 5 8 -12 579.756 359.95 2
 5 8 -11 375.333 357.295 2
 5 8 -10 508.971 403.195 2
 5 8 -9 2423.39 752.208 2
 5 8 -8 1228.59 550.446 2
 -5 8 5 4659.81 935.957 1
 -5 8 4 2005.75 673.382 1
 -5 8 3 6711.43 1148.22 1
 -5 8 2 769.336 410.483 1
 -5 8 2 178.845 233.296 2
 -5 8 1 1530.91 606.081 1
 -5 8 0 139.195 271.456 1
 -5 8 -1 2725.98 784.539 1
 -5 8 -2 132.803 386.745 1
 -5 8 -3 7401.2 1307.9 1
 -5 8 -4 1539.16 612.382 1
 -5 8 -5 3530.74 965.265 1
 -5 8 -6 536.151 436.331 1
 -5 8 -7 3940.19 1069.39 1
 -5 8 -8 79.2609 302.009 1
 -5 8 -9 1463.54 660.329 1
 -5 8 -10 70.7524 336.529 1
 -5 8 -11 968.726 550.513 1
 -5 8 -12 1132.97 742.383 1
 5 9 -12 -89.9768 243.787 2
 5 9 -11 3704.13 1035.25 2
 5 9 -10 3130.97 928.176 2
 5 9 -9 2446.56 811.906 2
 5 9 -8 -73.6273 237.593 2
 -5 9 4 2579.21 738.002 1
 -5 9 3 1286.56 556.148 1
 -5 9 2 1792.62 622.018 1
 -5 9 2 1413.08 494.095 2
 -5 9 1 1839.15 707.558 1
 -5 9 1 1836.13 577.397 2
 -5 9 0 3043.72 826.625 1
 -5 9 0 4272.28 856.102 2
 -5 9 -1 999.361 518.309 1
 -5 9 -2 735.944 496.023 1
 -5 9 -3 -223.566 337.678 1
 -5 9 -4 2630.18 859.535 1
 -5 9 -5 3988.04 1009.55 1
 -5 9 -6 1056.35 572.274 1
 -5 9 -7 536.033 491.44 1
 -5 9 -8 1182.16 601.851 1
 -5 9 -9 2050.71 780.66 1
 -5 9 -10 2393.28 940.556 1
 -5 10 0 172.571 319.524 2
 -5 10 -1 2712.06 763.25 2
 -5 10 -2 1514.75 694.019 1
 -5 10 -3 634.984 491.308 1
 -5 10 -4 571.665 576.015 1
 -5 10 -5 2470.68 904.262 1
 -5 10 -6 248.87 347.606 1
 -5 10 -7 8180.8 1576.56 1
 -5 10 -8 418.106 418.772 1
 -5 10 -9 7068.18 1558.27 1
 -5 11 -1 96.7941 294.681 2
 -5 11 -2 785.817 488.486 2
 -5 11 -3 889.848 512.837 2
 -6 0 0 608.571 292.864 1
 -6 0 1 570.598 306.139 1
 -6 0 -1 720.049 328.84 1
 -6 0 2 27035.3 1885.53 1
 -6 0 -2 26331.7 1932.23 1
 -6 0 -3 15083.3 1486.48 1
 -6 0 -4 4147.86 805.783 1
 -6 0 -5 35184.3 2315.8 1
 -6 0 -6 476.977 378.413 1
 -6 0 -7 1292.11 496.598 1
 -6 0 -8 8533.99 1252.2 1
 -6 0 -9 33241.9 2428.79 1
 -6 0 -10 1498.32 579.601 1
 -6 0 -11 19405.4 1960.35 1
 -6 0 -12 113.646 271.152 1
 -6 0 -13 -293.375 414.537 1
 -6 0 -14 2492.6 774.764 1
 -6 0 -15 -94.8207 376.425 1
 -6 0 -16 428.228 416.718 1
 -6 0 -17 4440.76 1087.93 1
 -6 0 -18 -343.436 386.967 1
 -6 0 -19 -1.19945 453.736 1
 -6 -1 -17 471.598 398.076 1
 -6 -1 -16 58.2479 282.636 1
 -6 -1 -15 -299.84 353.065 1
 -6 -1 -14 4197.73 945.589 1
 -6 -1 -13 1025.12 485.796 1
 -6 -1 -12 13112 1574.57 1
 -6 -1 -11 2449.83 677.471 1
 -6 -1 -10 16311.7 1681.74 1
 -6 -1 -9 81.3409 232.505 1
 -6 -1 -8 4579.03 896.687 1
 -6 -1 -7 1738.81 534.217 1
 -6 -1 -6 12642.4 1356.49 1
 -6 -1 -5 4712.26 830.57 1
 -6 -1 -4 8974.98 1123.31 1
 -6 -1 -3 4464.24 795.973 1
 -6 1 3 5027.67 845.032 1
 -6 1 2 4858.41 848.59 1
 -6 -1 -2 2981.15 629.44 1
 -6 1 1 5960.5 944.118 1
 -6 -1 -1 4592.07 766.36 1
 -6 -1 0 476.633 367.904 1
 -6 1 0 272.809 284.736 1
 -6 1 -1 5211.29 897.293 1
 -6 -1 1 5701.53 835.613 1
 -6 1 -2 3326.52 748.341 1
 -6 1 -3 5114.75 907.662 1
 -6 1 -4 9217.96 1246.09 1
 -6 1 -5 4097.97 845.336 1
 -6 1 -6 11612.8 1440.94 1
 -6 1 -7 1579.95 568.984 1
 -6 1 -8 3955.75 875.967 1
 -6 1 -9 25.6688 371.353 1
 -6 1 -10 16565.2 1831.2 1
 -6 1 -11 1925.2 686.721 1
 -6 1 -12 10847.6 1542.16 1
 -6 1 -13 550.984 422.795 1
 -6 1 -14 2540.19 776.2 1
 -6 1 -15 10.3176 328.491 1
 -6 1 -16 381.399 377.169 1
 -6 1 -17 1074.31 664.434 1
 -6 1 -18 -300.484 453.752 1
 -6 1 -19 673.972 513.649 1
 -6 -2 -14 105.99 179.064 1
 -6 -2 -13 2520.92 680.868 1
 -6 -2 -12 4500.47 900.407 1
 -6 -2 -11 6594.8 1063.81 1
 -6 -2 -10 56223.6 3004.94 1
 -6 -2 -9 16632 1609.92 1
 -6 -2 -8 719.129 304.527 1
 -6 -2 -7 -69.5019 217.745 1
 -6 -2 -6 79629.6 3251.44 1
 -6 -2 -5 54762.3 2638.25 1
 -6 2 4 38433.7 2407.7 1
 -6 -2 -4 33645.4 2050.73 1
 -6 2 3 16590.5 1608.85 1
 -6 -2 -3 14224.3 1309.49 1
 -6 -2 -2 17168.1 1419.14 1
 -6 2 2 17332.9 1631.76 1
 -6 -2 -1 10908.3 1119.45 1
 -6 2 1 11845 1370.97 1
 -6 2 0 3675.07 800.208 1
 -6 2 -1 9439.9 1231.2 1
 -6 2 -2 18299.9 1744.84 1
 -6 2 -3 16218.7 1668.15 1
 -6 2 -4 33738.1 2410.66 1
 -6 2 -5 50684.1 3039.75 1
 -6 2 -6 78949 3850.63 1
 -6 2 -7 445.163 411.259 1
 -6 2 -8 822.744 530.2 1
 -6 2 -9 15578.4 1790.9 1
 -6 2 -10 54391.8 3413.59 1
 -6 2 -11 6449.49 1217.18 1
 -6 2 -12 3810.94 976.303 1
 -6 2 -13 1548.84 670.455 1
 -6 2 -14 1165.04 520.946 1
 -6 2 -15 4429.16 1120.79 1
 -6 2 -16 -251.228 361.802 1
 -6 2 -17 2539.13 888.96 1
 -6 2 -18 306.61 507.752 1
 -6 -3 -10 4162.28 798.06 1
 -6 -3 -9 6214.35 921.878 1
 -6 -3 -8 826.873 373.813 1
 -6 -3 -7 3406.52 681.396 1
 -6 -3 -6 2583.33 587.036 1
 -6 -3 -5 52651.7 2438.82 1
 -6 3 4 34881.1 2362.5 1
 -6 -3 -4 30887.5 1828.75 1
 -6 -3 -3 2781.1 560.104 1
 -6 3 3 2512.33 695.406 1
 -6 3 2 -322.952 384.361 1
 -6 -3 -2 -22.74 156.829 1
 -6 3 1 3380.2 738.744 1
 -6 3 0 16689.5 1725.25 1
 -6 3 -1 4160.42 854.262 1
 -6 3 -2 297.466 349.059 1
 -6 3 -3 2751.28 770.68 1
 -6 3 -4 26940.9 2253.32 1
 -6 3 -5 55905.5 3282.61 1
 -6 3 -6 2289.59 785.391 1
 -6 3 -7 2534.97 751.74 1
 -6 3 -8 1165.13 573.089 1
 -6 3 -9 7170.66 1273.15 1
 -6 3 -10 3616.52 917.87 1
 -6 3 -11 1453.08 673.79 1
 -6 3 -12 2254.14 783.259 1
 -6 3 -13 1601.62 663.047 1
 -6 3 -14 2285.23 813.783 1
 -6 3 -15 1496.89 819.887 1
 -6 3 -16 353.399 431.266 1
 -6 3 -17 1245.35 700.117 1
 6 4 -16 919.092 453.661 1
 -6 -4 -6 13289.6 1142.16 1
 -6 4 5 2383.76 691.757 1
 -6 -4 -5 3411.4 575.467 1
 -6 -4 -4 66106.3 2471.72 1
 -6 4 4 63338.6 3257.41 1
 -6 4 3 3135.67 723.818 1
 -6 4 2 1614.28 593.177 1
 -6 4 1 14983.7 1640.3 1
 -6 4 0 -384.31 605.297 1
 -6 4 -1 15296.2 1691.94 1
 -6 4 -2 2772.57 746.112 1
 -6 4 -3 2344.19 748.604 1
 -6 4 -4 60516.7 3487.61 1
 -6 4 -5 1815.68 609.065 1
 -6 4 -6 11827.5 1606.78 1
 -6 4 -7 11833.9 1625.77 1
 -6 4 -8 1718.39 703.067 1
 -6 4 -9 52.4788 375.488 1
 -6 4 -10 3009.18 891.482 1
 -6 4 -11 3192.08 956.377 1
 -6 4 -12 250.763 382.994 1
 -6 4 -13 925.167 514.759 1
 -6 4 -14 2589.15 844.749 1
 -6 4 -15 2037.85 804.754 1
 -6 4 -16 266.737 535.624 1
 6 5 -16 341.718 338.93 1
 6 5 -15 1313.39 564.425 1
 6 5 -14 3606.63 796.59 1
 -6 5 5 3335.2 779.687 1
 -6 5 4 10679.7 1396.18 1
 -6 5 3 15589.7 1690.85 1
 -6 5 2 9056.85 1317.66 1
 -6 5 1 9835.14 1374.43 1
 -6 5 0 4888.14 981.177 1
 -6 5 -1 11286 1518.62 1
 -6 5 -2 8510.56 1325.61 1
 -6 5 -3 14382 1763.57 1
 -6 5 -4 13440.4 1704.15 1
 -6 5 -5 3702.1 935.167 1
 -6 5 -6 11901.7 1678.78 1
 -6 5 -7 258.349 284.422 1
 -6 5 -8 852.475 570.809 1
 -6 5 -9 2167.23 716.098 1
 -6 5 -10 -2.11288 310.329 1
 -6 5 -11 1504.29 635.764 1
 -6 5 -12 1198.23 669.265 1
 -6 5 -13 168.397 303.479 1
 -6 5 -14 2713.47 989.954 1
 -6 5 -15 974.754 653.177 1
 6 6 -15 1277.25 537.495 1
 6 6 -14 1377.25 518.864 1
 6 6 -13 2215.44 636.704 1
 6 6 -12 1142.97 456.423 1
 6 6 -11 21.0604 175.142 1
 -6 6 5 3694.37 857.152 1
 -6 6 4 1853.47 674.209 1
 -6 6 3 1839.45 654.293 1
 -6 6 2 35317.7 2666.08 1
 -6 6 1 -39.4438 334 1
 -6 6 0 1972.89 751.802 1
 -6 6 -1 58.4792 366.894 1
 -6 6 -2 31906.9 2626.17 1
 -6 6 -3 1505.55 688.564 1
 -6 6 -4 1265.54 558.209 1
 -6 6 -5 2425.82 723.282 1
 -6 6 -6 559.799 476.471 1
 -6 6 -7 11135.9 1684.38 1
 -6 6 -8 2935.6 956.54 1
 -6 6 -9 2903.02 893.358 1
 -6 6 -10 394.396 406.347 1
 -6 6 -11 762.826 587.535 1
 -6 6 -12 -17.041 354.878 1
 -6 6 -13 2985.56 978.63 1
 6 7 -15 1754.06 663.923 1
 6 7 -14 443.978 420.114 1
 6 7 -13 3118.63 805.063 1
 6 7 -12 266.09 305.798 1
 6 7 -11 1089.79 418.614 1
 6 7 -10 1202.56 486.776 1
 -6 7 5 728.012 428.533 1
 -6 7 4 5428.29 1063.36 1
 -6 7 3 -198.439 345.616 1
 -6 7 2 1261.38 531.515 1
 -6 7 1 348.357 380.794 1
 -6 7 0 5261.38 1115.69 1
 -6 7 -1 15.0187 332.868 1
 -6 7 -2 2906.03 844.744 1
 -6 7 -3 221.907 314.036 1
 -6 7 -4 4102.62 1048.61 1
 -6 7 -5 1269.82 622.878 1
 -6 7 -6 858.866 571.041 1
 -6 7 -7 448.415 354.93 1
 -6 7 -8 9312.59 1622.51 1
 -6 7 -9 533.402 463.697 1
 -6 7 -10 1376.52 618.101 1
 -6 7 -11 1299.83 671.221 1
 -6 7 -12 907.882 635.958 1
 -6 8 5 6874.03 1205.68 1
 -6 8 4 713.774 465.064 1
 -6 8 3 252.454 284.152 1
 -6 8 2 789.925 526.358 1
 -6 8 1 -215.958 377.289 1
 -6 8 0 5672.38 1161.56 1
 -6 8 -1 49.2615 229.897 1
 -6 8 -2 2371.61 794.538 1
 -6 8 -3 -40.1758 383.054 1
 -6 8 -4 71.2498 226.625 1
 -6 8 -5 6375.41 1324.72 1
 -6 8 -6 -35.7728 368.858 1
 -6 8 -7 556.2 402.924 1
 -6 8 -8 2639.21 961.257 1
 -6 8 -9 504.198 374.355 1
 -6 8 -10 752.85 509.715 1
 -6 9 5 96.84 241.985 1
 -6 9 4 135.897 284.803 1
 -6 9 3 615.409 398.198 1
 -6 9 2 83.3079 261.944 1
 -6 9 1 700.243 522.657 1
 -6 9 0 3914.5 1034.64 1
 -6 9 -1 1584.76 695.103 1
 -6 9 -2 -513.449 420.777 1
 -6 9 -3 938.628 602.208 1
 -6 9 -4 889.909 537.251 1
 -6 9 -5 1144.51 651.79 1
 -6 9 -6 596.131 454.925 1
 -6 9 -7 1685.89 764.677 1
 -6 9 -8 1076.28 632.851 1
 -6 10 0 1765.13 717.047 1
 -6 10 -1 492.35 446.569 1
 -6 10 -2 111.941 509.771 1
 -6 10 -3 3413.33 1044.02 1
 -6 10 -4 207.494 330.588 1
 -6 10 -5 1.28055 517.477 1
 -6 10 -6 1563.93 791.805 1
 -7 0 0 44.0839 305.937 1
 -7 0 1 50369.8 2776.45 1
 -7 0 -1 54427.8 2948.02 1
 -7 0 -2 -360.592 445.265 1
 -7 0 2 141.27 284.971 1
 -7 0 -3 259.687 239.82 1
 -7 0 -4 4451.06 913.921 1
 -7 0 -5 13393.4 1561.8 1
 -7 0 -6 8014.51 1230.62 1
 -7 0 -7 -315.744 307.48 1
 -7 0 -8 482.685 354.354 1
 -7 0 -9 488.418 470.932 1
 -7 0 -10 11947 1615.96 1
 -7 0 -11 3462.47 910.123 1
 -7 0 -12 -55.875 274.56 1
 -7 0 -13 1154.42 557.098 1
 -7 0 -14 -296.295 371.317 1
 -7 0 -15 2609.66 848.989 1
 -7 0 -16 521.877 497.6 1
 -7 0 -17 2168.25 816.438 1
 -7 0 -18 1178.29 718.253 1
 -7 -1 -15 1875.86 707.046 1
 -7 -1 -14 1993.48 697.275 1
 -7 -1 -13 -182.059 388.866 1
 -7 -1 -12 -42.0237 374.35 1
 -7 -1 -11 3405.21 864.261 1
 -7 -1 -10 10244.3 1447.73 1
 -7 -1 -9 3090.72 827.127 1
 -7 -1 -8 -49.7275 329.172 1
 -7 -1 -7 970.017 449.71 1
 -7 -1 -6 986.324 496.173 1
 -7 -1 -5 16832.1 1683.92 1
 -7 -1 -4 10895.5 1346.43 1
 -7 1 3 28154.3 2164.07 1
 -7 -1 -3 26770.3 2056.21 1
 -7 1 2 15338.9 1593.66 1
 -7 -1 -2 12088.1 1344.27 1
 -7 -1 -1 10972.2 1287.13 1
 -7 1 1 11960.7 1428.16 1
 -7 1 0 1768.14 586.364 1
 -7 -1 0 2625.91 651.938 1
 -7 1 -1 9760.68 1307.52 1
 -7 -1 1 11183.5 1292.42 1
 -7 1 -2 15355.3 1676.54 1
 -7 1 -3 28234.4 2271.07 1
 -7 1 -4 11495.2 1483.12 1
 -7 1 -5 16262.1 1772.89 1
 -7 1 -6 103.804 368.646 1
 -7 1 -7 2122.02 700.603 1
 -7 1 -8 261.526 300.6 1
 -7 1 -9 2893.75 858.212 1
 -7 1 -10 8532.47 1413.03 1
 -7 1 -11 2119.46 720.728 1
 -7 1 -12 -159.719 324.554 1
 -7 1 -13 374.977 373.621 1
 -7 1 -14 798.637 507.263 1
 -7 1 -15 708.759 539.777 1
 -7 1 -16 1509.88 746.566 1
 -7 1 -17 801.784 547.09 1
 -7 -2 -12 1349.66 556.728 1
 -7 -2 -11 2244 681.883 1
 -7 -2 -10 8065.09 1223.68 1
 -7 -2 -9 7271.21 1140.02 1
 -7 -2 -8 2607.08 678.718 1
 -7 -2 -7 5596.23 963.308 1
 -7 -2 -6 2089.61 613.907 1
 -7 -2 -5 6344.61 979.954 1
 -7 -2 -4 37271.1 2338.7 1
 -7 2 3 26067.5 2148.74 1
 -7 -2 -3 25089.6 1880.36 1
 -7 -2 -2 2580.15 642.891 1
 -7 2 2 2148.17 624.47 1
 -7 -2 -1 15929.9 1489.76 1
 -7 2 1 15955.9 1713.89 1
 -7 2 0 11176.2 1444.66 1
 -7 2 -1 17355.1 1808.79 1
 -7 2 -2 1022.97 513.938 1
 -7 2 -3 24968.5 2225.37 1
 -7 2 -4 41326.8 2870.06 1
 -7 2 -5 8840.4 1372.31 1
 -7 2 -6 2769.58 807.134 1
 -7 2 -7 5553.95 1144.35 1
 -7 2 -8 2733.64 769.752 1
 -7 2 -9 6643.13 1266.63 1
 -7 2 -10 8631.05 1479.95 1
 -7 2 -11 1399.7 668.983 1
 -7 2 -12 2136.84 758.776 1
 -7 2 -13 -71.9809 417.663 1
 -7 2 -14 1861.68 744.493 1
 -7 2 -15 2446.57 855.765 1
 -7 2 -16 -1404.88 726.657 1
 -7 -3 -8 9587.63 1203 1
 -7 -3 -7 5247.89 891.056 1
 -7 -3 -6 4146.27 766.93 1
 -7 -3 -5 8286.58 1060.27 1
 -7 3 4 43409.7 2804.35 1
 -7 -3 -4 43464 2386.52 1
 -7 -3 -3 16528 1463.41 1
 -7 3 3 13412.6 1590.19 1
 -7 3 2 3401.79 850.571 1
 -7 3 1 9307.53 1356.81 1
 -7 3 0 11466.7 1520.22 1
 -7 3 -1 8926.19 1360.01 1
 -7 3 -2 1311.14 536.659 1
 -7 3 -3 13762.8 1721.45 1
 -7 3 -4 38353.8 2866.61 1
 -7 3 -5 8164.86 1376.74 1
 -7 3 -6 5423.57 1130.57 1
 -7 3 -7 3681.66 1019.98 1
 -7 3 -8 8636.1 1425.31 1
 -7 3 -9 2748.67 879.776 1
 -7 3 -10 2896.2 970.156 1
 -7 3 -11 892.154 636.573 1
 -7 3 -12 693.065 517.497 1
 -7 3 -13 2187.23 837.384 1
 -7 3 -14 1408.83 654.376 1
 -7 3 -15 3129.39 994.114 1
 -7 4 4 6540.52 1183.78 1
 -7 4 3 32.1049 270.906 1
 -7 4 2 1510.51 661.934 1
 -7 4 1 6846.53 1207.01 1
 -7 4 0 41.7559 352.459 1
 -7 4 -1 6609.91 1208.19 1
 -7 4 -2 2497.91 766.295 1
 -7 4 -3 -460.903 440.5 1
 -7 4 -4 4722.61 1076.1 1
 -7 4 -5 3826.92 975.134 1
 -7 4 -6 5370.4 1184.49 1
 -7 4 -7 510.601 557.806 1
 -7 4 -8 2847.91 911.918 1
 -7 4 -9 10445.7 1699.05 1
 -7 4 -10 2930.29 939.163 1
 -7 4 -11 1008.14 592.262 1
 -7 4 -12 10123.4 1746.83 1
 -7 4 -13 7638.3 1538.32 1
 -7 4 -14 599.164 485.944 1
 -7 5 5 2062.15 655.743 1
 -7 5 4 6212.72 1139.64 1
 -7 5 3 1099.15 518.963 1
 -7 5 2 6778.78 1215.8 1
 -7 5 1 1005.31 529.505 1
 -7 5 0 3537 998.327 1
 -7 5 -1 507.46 357.599 1
 -7 5 -2 5975.36 1220.65 1
 -7 5 -3 835.707 544.295 1
 -7 5 -4 10405.6 1605.42 1
 -7 5 -5 1651.58 644.9 1
 -7 5 -6 8247.6 1480.07 1
 -7 5 -7 1664.37 643.828 1
 -7 5 -8 2962.03 939.751 1
 -7 5 -9 8453.83 1552.2 1
 -7 5 -10 1701.74 730.6 1
 -7 5 -11 425.351 483.158 1
 -7 5 -12 837.977 667.121 1
 -7 5 -13 654.06 519.558 1
 7 6 -14 -434.349 347.327 1
 7 6 -13 1653.78 581.64 1
 7 6 -12 1675.32 564.762 1
 -7 6 5 3293.52 854.742 1
 -7 6 4 519.151 517.7 1
 -7 6 3 223.356 415.739 1
 -7 6 2 395.474 391.626 1
 -7 6 1 16834.9 1965.34 1
 -7 6 0 10617.6 1605.1 1
 -7 6 -1 16188.3 1992.27 1
 -7 6 -2 287.03 412.344 1
 -7 6 -3 1303.71 623.72 1
 -7 6 -4 1350.93 605.174 1
 -7 6 -5 2029.87 749.825 1
 -7 6 -6 1296.03 617.817 1
 -7 6 -7 609.369 418.81 1
 -7 6 -8 1072.27 687.12 1
 -7 6 -9 5225.89 1279.8 1
 -7 6 -10 891.987 578.386 1
 -7 6 -11 2953.3 1019.3 1
 -7 7 5 617.603 455.408 1
 -7 7 4 2159.11 767.255 1
 -7 7 3 814.016 511.338 1
 -7 7 2 2964.03 885.378 1
 -7 7 1 -249.805 332.378 1
 -7 7 0 4254.49 1065.99 1
 -7 7 -1 69.8733 350.645 1
 -7 7 -2 2882.4 871.295 1
 -7 7 -3 1923.28 796.083 1
 -7 7 -4 2546.38 901.683 1
 -7 7 -5 -671.495 482.803 1
 -7 7 -6 2471.1 911.883 1
 -7 7 -7 -174.342 342.878 1
 -7 7 -8 9176.4 1688.82 1
 -7 7 -9 430.381 509.372 1
 -7 7 -10 -125.004 403.083 1
 -7 8 5 2973.25 880.517 1
 -7 8 4 2089.09 745.445 1
 -7 8 3 -161.925 270.973 1
 -7 8 2 6360.64 1289.35 1
 -7 8 1 955.981 569.425 1
 -7 8 0 155.556 402.581 1
 -7 8 -1 4838.67 1168.2 1
 -7 8 -2 4939.37 1185.13 1
 -7 8 -3 611.052 511.566 1
 -7 8 -4 2359.76 865.642 1
 -7 8 -5 5313.28 1271.19 1
 -7 8 -6 233.107 430.777 1
 -7 8 -7 393.542 445.838 1
 -7 8 -8 -211.594 376.925 1
 -7 9 4 1388.02 644.375 1
 -7 9 3 653.981 472.181 1
 -7 9 2 94.2409 376.829 1
 -7 9 1 144.076 321.336 1
 -7 9 0 1005.07 678.365 1
 -7 9 -1 588.731 474.152 1
 -7 9 -2 1186.54 660.325 1
 -7 9 -3 -1183.41 668.87 1
 -7 9 -4 1643.27 767.308 1
 -7 9 -5 344.769 421.595 1
 -8 0 0 2401.84 682.516 1
 -8 0 1 52026.4 3072.21 1
 -8 0 -1 55068.7 3201.67 1
 -8 0 -2 223.104 326.603 1
 -8 0 -3 24364.2 2179.54 1
 -8 0 -4 1696.01 616.293 1
 -8 0 -5 10108.9 1444.57 1
 -8 0 -6 3898.38 970.398 1
 -8 0 -7 2712.19 798.738 1
 -8 0 -8 -89.1052 236.483 1
 -8 0 -9 2084.1 737.179 1
 -8 0 -10 1367.55 598.638 1
 -8 0 -11 4619.19 1084.25 1
 -8 0 -12 997.786 588.038 1
 -8 0 -13 3089.39 941.827 1
 -8 0 -14 -153.406 367.549 1
 -8 0 -15 472.499 467.22 1
 -8 0 -16 -34.8873 256.18 1
 -8 -1 -13 155.219 273.116 1
 -8 -1 -12 1637.41 653.904 1
 -8 -1 -11 1672.9 652.595 1
 -8 -1 -10 758.827 441.802 1
 -8 -1 -9 1024.05 481.707 1
 -8 -1 -8 1627.39 601.096 1
 -8 -1 -7 5790.82 1125.51 1
 -8 -1 -6 849.584 521.276 1
 -8 -1 -5 2535.54 702.944 1
 -8 -1 -4 10409.6 1408.67 1
 -8 -1 -3 2248.81 661.591 1
 -8 -1 -2 4734.01 939.217 1
 -8 1 2 6667.52 1134.58 1
 -8 1 1 6969.37 1163.59 1
 -8 -1 -1 4799.89 932.816 1
 -8 1 0 5442.89 1025.43 1
 -8 -1 0 4327.31 858.593 1
 -8 1 -1 6350.39 1139.67 1
 -8 1 -2 5972.29 1137.71 1
 -8 1 -3 1579.56 608.141 1
 -8 1 -4 6761.58 1226.08 1
 -8 1 -5 2607.3 786.392 1
 -8 1 -6 375.976 378.968 1
 -8 1 -7 5771.24 1152.36 1
 -8 1 -8 2085.02 764.596 1
 -8 1 -9 263.589 377.607 1
 -8 1 -10 1.05026 383.997 1
 -8 1 -11 632.056 566.873 1
 -8 1 -12 2334.94 833.867 1
 -8 1 -13 66.2978 347.245 1
 -8 1 -14 -365.523 482.094 1
 -8 1 -15 1712.19 775.823 1
 -8 1 -16 -286.241 389.778 1
 -8 -2 -10 2191.8 676.668 1
 -8 -2 -9 1198.1 570.015 1
 -8 -2 -8 2107.13 690.105 1
 -8 -2 -7 509.58 385.961 1
 -8 -2 -6 1661.16 590.999 1
 -8 -2 -5 3516.22 804.586 1
 -8 -2 -4 4120.46 837.582 1
 -8 -2 -3 2160.3 634.294 1
 -8 2 3 1815.58 725.571 1
 -8 -2 -2 72.9646 229.644 1
 -8 2 2 114.429 306.412 1
 -8 2 1 3023.22 832.39 1
 -8 -2 -1 3729.35 778.5 1
 -8 2 0 1440.82 594.073 1
 -8 2 -1 3829.5 898.12 1
 -8 2 -2 129.878 371.091 1
 -8 2 -3 2161.49 733.842 1
 -8 2 -4 5657.49 1151.51 1
 -8 2 -5 4309.29 1014.57 1
 -8 2 -6 3573.31 930.58 1
 -8 2 -7 58.2956 377.883 1
 -8 2 -8 868.537 522.835 1
 -8 2 -9 330.891 329.786 1
 -8 2 -10 3253.17 961.051 1
 -8 2 -11 -571.84 498.716 1
 -8 2 -12 2560.35 949.495 1
 -8 2 -13 617.621 477.918 1
 -8 2 -14 379.679 495.817 1
 -8 2 -15 587.676 509.115 1
 -8 -3 -6 545.025 399.994 1
 -8 -3 -5 4136.44 825.654 1
 -8 3 4 2581.69 754.459 1
 -8 -3 -4 3818.83 800.093 1
 -8 -3 -3 1493.53 501.362 1
 -8 3 3 983.654 606.635 1
 -8 3 2 718.864 578.86 1
 -8 3 1 1575.11 614.9 1
 -8 3 0 318.167 321.171 1
 -8 3 -1 3090.54 846.846 1
 -8 3 -2 1415.4 686.162 1
 -8 3 -3 1829.83 799.446 1
 -8 3 -4 4547.49 1100.7 1
 -8 3 -5 2864.44 858.806 1
 -8 3 -6 400.652 261.051 1
 -8 3 -7 -366.641 486.97 1
 -8 3 -8 1191.93 590.252 1
 -8 3 -9 2231.45 825.886 1
 -8 3 -10 496.851 520.956 1
 -8 3 -11 2802.23 922.305 1
 -8 3 -12 4836.96 1232.25 1
 -8 3 -13 4790.85 1260.92 1
 -8 4 4 1295.8 577.671 1
 -8 4 3 4041.5 980.002 1
 -8 4 2 11111.6 1569.56 1
 -8 4 1 1714.94 693.394 1
 -8 4 0 75.7054 275.19 1
 -8 4 -1 4661.45 1107.06 1
 -8 4 -2 12042.6 1734.86 1
 -8 4 -3 3450.14 953.023 1
 -8 4 -4 2368.96 860.219 1
 -8 4 -5 4275.34 1062.25 1
 -8 4 -6 1259.5 695.925 1
 -8 4 -7 5826.38 1263.19 1
 -8 4 -8 1371.99 665.275 1
 -8 4 -9 1262.48 677.968 1
 -8 4 -10 1990.58 768.069 1
 -8 4 -11 8058.06 1623.71 1
 -8 4 -12 916.137 563.97 1
 -8 5 4 2783.8 823.548 1
 -8 5 3 9286.47 1483.9 1
 -8 5 2 1062.67 558.835 1
 -8 5 1 2557.97 761.176 1
 -8 5 0 1444.33 658.394 1
 -8 5 -1 2824.67 900.672 1
 -8 5 -2 656.767 516.414 1
 -8 5 -3 9842.97 1620.08 1
 -8 5 -4 3767.89 1042.73 1
 -8 5 -5 1574.42 772.089 1
 -8 5 -6 620.778 339.54 1
 -8 5 -7 -1069.72 629.418 1
 -8 5 -8 216.576 355.603 1
 -8 5 -9 -171.766 472.538 1
 -8 5 -10 1985.02 925.9 1
 -8 5 -11 2255.57 971.33 1
 -8 6 4 781.903 492.525 1
 -8 6 3 98.9389 312.71 1
 -8 6 2 1067.48 586.483 1
 -8 6 1 277.192 344.244 1
 -8 6 0 1842.77 722.685 1
 -8 6 -1 266.23 467.214 1
 -8 6 -2 208.199 384.358 1
 -8 6 -3 174.731 408.399 1
 -8 6 -4 446.941 480.376 1
 -8 6 -5 2736 928.685 1
 -8 6 -6 2709.26 914.845 1
 -8 6 -7 2519.47 967.226 1
 -8 6 -8 2201.3 886.164 1
 -8 6 -9 1498.64 755.814 1
 -8 7 4 1378.59 633.185 1
 -8 7 3 2124.09 784.64 1
 -8 7 2 2373.01 867.459 1
 -8 7 1 1115.53 580.381 1
 -8 7 0 -309.562 406.554 1
 -8 7 -1 800.462 561.059 1
 -8 7 -2 3254.26 1005.12 1
 -8 7 -3 3351.21 1034.87 1
 -8 7 -4 2295.93 869.565 1
 -8 7 -5 333.627 449.471 1
 -8 7 -6 2924.41 1032.91 1
 -8 8 4 992.97 570.017 1
 -8 8 3 1138.28 678.204 1
 -8 8 2 2697.07 906.736 1
 -8 8 1 1109.4 609.789 1
 -8 8 0 10679.4 1774.01 1
 -8 8 -1 -15.0241 429.203 1
 -8 8 -2 2711.74 969.767 1
 -8 8 -3 619.249 514.977 1
 -9 0 0 391.178 411.193 1
 -9 0 -1 2303.23 700.13 1
 -9 0 1 3643.19 908.094 1
 -9 0 -2 78.0991 286.095 1
 -9 0 -3 4510.62 1010.77 1
 -9 0 -4 3489.68 909.069 1
 -9 0 -5 2879.89 843.858 1
 -9 0 -6 4274.69 1065.5 1
 -9 0 -7 2680 858.56 1
 -9 0 -8 2785.7 864.152 1
 -9 0 -9 1552.34 707.745 1
 -9 0 -10 740.044 483.604 1
 -9 0 -11 987.198 546.052 1
 -9 0 -12 3465.74 1008.19 1
 -9 0 -13 422.006 523.543 1
 -9 0 -14 4097.78 1133.39 1
 -9 -1 -11 -360.365 369.41 1
 -9 -1 -10 8722.62 1484.19 1
 -9 -1 -9 2317.25 788.957 1
 -9 -1 -8 -77.9603 242.442 1
 -9 -1 -7 -175.29 296.778 1
 -9 -1 -6 310.836 289.523 1
 -9 -1 -5 5052.2 1055.43 1
 -9 -1 -4 751.051 395.044 1
 -9 -1 -3 103.517 360.243 1
 -9 1 2 139.719 247.275 1
 -9 -1 -2 220.839 307.281 1
 -9 -1 -1 585.405 398.352 1
 -9 1 1 1697.77 687.504 1
 -9 1 0 816.28 498.938 1
 -9 1 -1 2069.03 665.208 1
 -9 1 -2 696.277 466.133 1
 -9 1 -3 41.3261 363.669 1
 -9 1 -4 683.529 455.38 1
 -9 1 -5 4586 1082.44 1
 -9 1 -6 280.25 342.475 1
 -9 1 -7 476.423 420.006 1
 -9 1 -8 -394.793 464.324 1
 -9 1 -9 1277.9 626.76 1
 -9 1 -10 6599.87 1365.08 1
 -9 1 -11 222.708 436.408 1
 -9 1 -12 6422.85 1418.71 1
 -9 1 -13 1260.19 726.011 1
 -9 -2 -8 4057.53 932.407 1
 -9 -2 -7 783.242 472.085 1
 -9 -2 -6 429.363 403.267 1
 -9 -2 -5 135.469 288.976 1
 -9 -2 -4 -187.495 382.904 1
 -9 -2 -3 702.868 353.651 1
 -9 -2 -2 376.566 233.874 1
 -9 2 2 786.198 433.309 1
 -9 2 1 258.759 299.732 1
 -9 2 0 5795.88 1173.51 1
 -9 2 -1 339.833 258.881 1
 -9 2 -2 1059.75 509.925 1
 -9 2 -3 888.128 559.564 1
 -9 2 -4 -620.397 493.08 1
 -9 2 -5 -728.047 492.146 1
 -9 2 -6 1271.31 598.047 1
 -9 2 -7 996.062 552.763 1
 -9 2 -8 2315.35 834.604 1
 -9 2 -9 1257.92 648.963 1
 -9 2 -10 8789.28 1646.1 1
 -9 2 -11 523.042 436.47 1
 -9 2 -12 707.543 701.952 1
 -9 3 3 443.873 392.192 1
 -9 3 2 2832.56 867.218 1
 -9 3 1 3434.7 934.194 1
 -9 3 0 520.364 400.317 1
 -9 3 -1 3091 896.296 1
 -9 3 -2 6218.56 1276.81 1
 -9 3 -3 1574.62 768.047 1
 -9 3 -4 3934.19 1046.11 1
 -9 3 -5 904.552 530.146 1
 -9 3 -6 2318.35 859.99 1
 -9 3 -7 2138.19 848.248 1
 -9 3 -8 1589.31 681.104 1
 -9 3 -9 1767.71 709.181 1
 -9 3 -10 1828.05 784.604 1
 -9 3 -11 5989.09 1397.66 1
 -9 4 3 3106.56 912.552 1
 -9 4 2 829.18 515.997 1
 -9 4 1 -173.86 269.559 1
 -9 4 0 6997.52 1392.98 1
 -9 4 -1 576.369 543.232 1
 -9 4 -2 2370.82 887.084 1
 -9 4 -3 4351.76 1120.22 1
 -9 4 -4 2435.6 870.815 1
 -9 4 -5 -1017.78 641.635 1
 -9 4 -6 247.116 362.794 1
 -9 4 -7 897.3 681.469 1
 -9 4 -8 747.601 527.072 1
 -9 4 -9 544.205 455.882 1
 -9 5 4 7331.98 1419.67 1
 -9 5 3 2529.04 857.275 1
 -9 5 2 695.728 572.411 1
 -9 5 1 2940.65 928.484 1
 -9 5 0 2815.91 911.64 1
 -9 5 -1 3627.52 1065.02 1
 -9 5 -2 -33.535 305.946 1
 -9 5 -3 3163.63 1088.64 1
 -9 5 -4 4451.6 1167.49 1
 -9 5 -5 9820.38 1744.2 1
 -9 5 -6 1750.49 787.228 1
 -9 5 -7 -52.4239 406.972 1
 -9 6 4 4785.17 1172.87 1
 -9 6 3 653.826 374.288 1
 -9 6 2 4005.76 1109.72 1
 -9 6 1 1085.16 666.126 1
 -9 6 0 3073 959.886 1
 -9 6 -1 -17.1447 272.118 1
 -9 6 -2 3839.07 1073.78 1
 -9 6 -3 2148.09 899.487 1
 -9 6 -4 4304.46 1187.22 1
 -10 0 0 3838.77 935.122 1
 -10 0 -1 -270.16 271.613 1
 -10 0 -2 -416.35 366.477 1
 -10 0 -3 224.293 330.15 1
 -10 0 -4 1340.54 607.941 1
 -10 0 -5 91.1319 219.876 1
 -10 0 -6 551.303 485.911 1
 -10 0 -7 946.303 561.524 1
 -10 0 -8 -1071.49 622.882 1
 -10 0 -9 969.638 614.621 1
 -10 0 -10 -383.919 400.948 1
 -10 0 -11 61.6366 276.989 1
 -10 -1 -9 318.201 311.862 1
 -10 -1 -8 355.147 454.752 1
 -10 -1 -7 2486.23 810.136 1
 -10 -1 -6 1674.22 709.003 1
 -10 -1 -5 -54.4373 233.765 1
 -10 -1 -4 745.818 446.478 1
 -10 -1 -3 2560.82 784.721 1
 -10 -1 -2 -110.474 304.334 1
 -10 1 1 -291.211 398.236 1
 -10 1 0 1444.27 622.112 1
 -10 1 -1 179.222 282.216 1
 -10 1 -2 1132.43 574.417 1
 -10 1 -3 1105.2 617.012 1
 -10 1 -4 1257.74 642.495 1
 -10 1 -5 648.357 443.128 1
 -10 1 -6 776.58 557.477 1
 -10 1 -7 1922.88 773.186 1
 -10 1 -8 -607.974 490.014 1
 -10 1 -9 140.072 494.165 1
 -10 1 -10 1012.29 670.25 1
 -10 -2 -5 1234.76 537.753 1
 -10 -2 -4 1028.95 477.758 1
 -10 -2 -3 351.67 367.303 1
 -10 2 2 3359.1 936.773 1
 -10 2 1 839.586 490.182 1
 -10 2 0 1284.02 624.826 1
 -10 2 -1 -95.4068 368.934 1
 -10 2 -2 2183.72 869.785 1
 -10 2 -3 2284.97 826.955 1
 -10 2 -4 1599.86 808.277 1
 -10 2 -5 380.913 427.8 1
 -10 2 -6 2209.63 865.819 1
 -10 2 -7 63.5848 264.347 1
 -10 2 -8 1481.75 736.65 1
 -10 3 2 1191.69 626.332 1
 -10 3 1 3440.48 977.825 1
 -10 3 0 372.694 416.508 1
 -10 3 -1 3629.12 1062.95 1
 -10 3 -2 371.804 503.913 1
 -10 3 -3 3124.57 988.912 1
 -10 3 -4 1206.29 691.427 1
 -10 3 -5 1648.33 768.025 1
 -10 3 -6 635.248 514.194 1
 -10 4 2 -50.1189 286.477 1
 -10 4 1 2441.9 867.357 1
 -10 4 0 3733.89 1066.67 1
 -10 4 -1 1505.89 720.853 1
 -10 4 -2 1051.46 627.604 1
 -10 4 -3 971.026 578.179 1
 -11 0 -1 2210.62 808.697 1
 -11 0 -2 6241.45 1335.33 1
 -11 0 -3 2860.29 919.116 1
 -11 0 -4 1304.32 739.218 1
 -11 0 -5 430.598 391.828 1
 -11 0 -6 -234.606 390.119 1
 -11 -1 -5 759.299 497.99 1
 -11 -1 -4 1414.42 682.061 1
 -11 -1 -3 2342.35 813.553 1
 -11 1 -1 1409.47 662.546 1
 -11 1 -2 3314.48 979.203 1
